# Supplementary material for: SIGMAP: an explainable artificial intelligence tool for SIGMA-1 receptor affinity prediction
Source: RSC Med Chem. 2024 Nov 8;16(2):835–48. doi: 10.1039/d4md00722k (PMC11605305; doi:10.1039/d4md00722k)
Supplement: MD-016-D4MD00722K-s001 [file MD-016-D4MD00722K-s001.xlsx]

## Sheet: Foglio1
MOL_NAME	SMILES	Ki [nM]
6a	O=C(N1CC2(CN(C3=CC=CC=C3)CC2)CC1)OC(C)(C)C	40.7 ± 0.95
7b	N1(CC2=CC=CC=C2)CC3(CN(C4=CC=CC=C4)CC3)CC1	10 ± 1.4
8a	N1(CCC2=CC=CC=C2)CC3(CN(C4=CC=CC=C4)CC3)CC1	6.5 ± 0.9
8b	N1(C2=CC=CC=C2)CC3(CN(CCCC4=CC=CC=C4)CC3)CC1	8.6 ± 1.4
9a	O=[N+](C1=CC=C(N2CC3(CN(CCC4=CC=CC=C4)CC3)CC2)C=C1)[O-]	0.76 ± 0.17
9b	COC1=CC=C(N2CC3(CN(CCC4=CC=CC=C4)CC3)CC2)C=C1	6.2 ± 1.8
9c	CC(C(C=C1)=CC=C1N2CC3(CN(CCC4=CC=CC=C4)CC3)CC2)=O	3.0 ± 0.46
9d	N#CC1=CC=C(N2CC3(CN(CCC4=CC=CC=C4)CC3)CC2)C=C1	3.5 ± 0.7
11b	N1(CC2=CC=CC=C2)CC3(CN(CC4=CC=CC=C4)CC3)CC1	1.8 ± 0.4
13a	N1(CC2=CC=CC=C2)CC3(CN(CCC4=CC=CC=C4)CC3)CC1	2.5 ± 0.4
13b	N1(CC2=CC=CC=C2)CC3(CN(CCCC4=CC=CC=C4)CC3)CC1	11 ± 2.0
14a	N1(CCC2=CC=CC=C2)CC3(CN(CCC4=CC=CC=C4)CC3)CC1	2.1 ± 0.4
14b	N1(CCC2=CC=CC=C2)CC3(CN(CCCC4=CC=CC=C4)CC3)CC1	11 ± 1.4
15a	O=C(N1CC2(CN(CCC3=CC=CC=C3)CC2)CC1)CC4=CC=C(Cl)C(Cl)=C4	7.5 ± 1.0
15b	O=C(N1CC2(CN(CCC3=CC=CC=C3)CC2)CC1)CC4=CC=C(OC)C(OC)=C4	435 ± 35
15d	O=C(N1CC2(CN(CCC3=CC=CC=C3)CC2)CC1)C4=CC=CC=C4	209 ± 18
15e	O=C(N1CC2(CN(CCC3=CC=CC=C3)CC2)CC1)CC4=CC=CC=C4	79 ± 3.8
16a	ClC1=CC=C(C=C1Cl)CCN2CC3(CN(CCC4=CC=CC=C4)CC3)CC2	4.2 ± 0.8
16b	COC1=CC=C(C=C1OC)CCN2CC3(CN(CCC4=CC=CC=C4)CC3)CC2	25 ± 5.3
16c	N1(CCCC2=CC=CC=C2)CC3(CN(CCCC4=CC=CC=C4)CC3)CC1	36 ± 5.7
1	OC(=O)C(O)=O.CC1CCCN(CCCOc2ccc(cc2)-c2ccccc2)C1	1.5 [0.5, 4.1]
2	OC(=O)C(O)=O.CC1CCN(CCCOc2ccc(cc2)-c2ccccc2)CC1	2.4 [0.7, 8.2]
3	OC(=O)C(O)=O.C(COc1ccc(cc1)-c1ccccc1)CN1CCCCCC1	1.9 [0.6, 5.8]
4	OC(=O)C(O)=O.C(COc1ccc(cc1)-c1ccccc1)CN1CCCC1	24 [8.4, 66]
5	OC(=O)C(O)=O.C(COc1ccc(Oc2ccccc2)cc1)CN1CCCCC1	28 [5.7, 136]
6	OC(=O)C(O)=O.C(COc1ccc(Oc2ccccc2)cc1)CN1CCCCC1	18 [8.2, 39]
7	OC(=O)C(O)=O.C(COc1ccc(Nc2ccccc2)cc1)CN1CCCCC1	4.8 [2.8, 8.4]
8	OC(=O)C(O)=O.C(COc1ccc(Cc2ccccc2)cc1)CN1CCCCC1	5.5 [1.1, 27]
9	OC(=O)C(O)=O.C(CCN1CCCCC1)COc1ccc(cc1)-c1ccccc1	95 [36, 252]
10	OC(=O)C(O)=O.C(CCOc1ccc(cc1)-c1ccccc1)CCN1CCCCC1	140 [78, 251]
11	OC(=O)C(O)=O.C(CCCN1CCCCC1)CCOc1ccc(cc1)-c1ccccc1	118 [31, 449]
12	OC(=O)C(O)=O.N#Cc1ccc(cc1)-c1ccc(OCCCN2CCC(CC2)c2ccncc2)cc1	4.5 [1.3, 15]
13	OC(=O)C(O)=O.C(COc1ccc(Oc2ccccc2)cc1)CN1CCC(CC1)c1ccncc1	5.6 [2.8, 11]
14	OC(=O)C(O)=O.C(COc1ccc(Nc2ccccc2)cc1)CN1CCC(CC1)c1ccncc1	3.3 [1.6, 7.1]
15	OC(=O)C(O)=O.C(COc1ccc(Cc2ccccc2)cc1)CN1CCC(CC1)c1ccncc1	2.8 [1.3, 6]
16	OC(=O)C(O)=O.CC(C)(C)c1ccc(OCCCCN2CCN(CC2)c2cnccn2)cc1	7.6 [4, 14]
KSK67	OC(=O)C(O)=O.O=C(C1CC1)c1ccc(OCCCN2CCN(CC2)c2ccncc2)cc1	1531 [652, 3593]
KSK68	OC(=O)C(O)=O.O=C(C1CC1)c1ccc(OCCCN2CCC(CC2)c2ccncc2)cc1	3.64 [1.81, 7.30]
KSK94	OC(=O)C(O)=O.N#Cc1ccc(cc1)-c1ccc(OCCCN2CCN(CC2)c2ccncc2)cc1	2958 [629, 13904]
