# Supplementary material for: SIGMAP: an explainable artificial intelligence tool for SIGMA-1 receptor affinity prediction
Source: RSC Med Chem. 2024 Nov 8;16(2):835–48. doi: 10.1039/d4md00722k (PMC11605305; doi:10.1039/d4md00722k)
Supplement: MD-016-D4MD00722K-s002 [file MD-016-D4MD00722K-s002.xlsx]

## Sheet: default_1
Molecule ChEMBL ID	SMILES	pki(mean)
CHEMBL5274668	CN(c1ccc2c(c1)C(=O)N(C2=O)CCCCCCn1cc(c2c1cccc2)CCCCN1CCC2(CC1)OCc1c2cccc1)C	7.42
CHEMBL3040082	Oc1ccc2c(c1)C1(C)CCN(C(C2)C1C)Cc1ccccc1	9.17
CHEMBL5282332	Fc1ccc(cc1)CN1CCC2(C(C1Cc1c2cc(cc1)O)C)C	8.84
CHEMBL289948	Oc1ccc2c(c1)C1(C)CCN(C(C2)C1C)CCN(c1ccccc1)C	8.25
CHEMBL5276090	CC(c1ccc(cc1)c1ccccc1)CCN1CCC(CC1)NC(=O)C	7.96
CHEMBL41313	Oc1ccc2c(c1)C1(C)CCN(C(C2)C1C)CCN1CCCCC1	8.02
CHEMBL5279648	CC1C2Cc3c(C1(C)CCN2Cc1ccccc1)c(Cl)c(cc3)O	8.76
CHEMBL5278355	CCCCCCNCCC1CCCC(O1)c1ccccc1	8.82
CHEMBL287794	Oc1ccc2c(c1)C1(C)CCN(C(C2)C1C)CCNc1ccccc1	8.23
CHEMBL5290521	CC1C2Cc3c(C1(C)CCN2Cc1ccccc1)cc(cc3)N(C)C	8.76
CHEMBL5265887	CC(c1ccc(cc1)c1ccccc1)CCN1CCC(CC1)NC(=O)CCCCCC(=O)NC1CCN(CC1)CCC(c1ccc(cc1)c1ccccc1)C	5.89
CHEMBL5271621	CC(c1ccc(cc1)c1ccccc1)CCN1CCC(CC1)NC(=O)CCOCCOCCOCCOCCOCCOCCOCCOCCOCCC(=O)NC1CCN(CC1)CCC(c1ccc(cc1)c1ccccc1)C	6.1
CHEMBL5286681	O=C(NC1CCN(CC1)CCC(c1ccc(cc1)c1ccccc1)C)COCCOCCOCCOCCNC(=O)c1ccccc1	5.8
CHEMBL5284531	CN(c1ccc2c(c1)C(=O)N(C2=O)c1ccc2c(c1)n(CCCCN1CCC3(CC1)OCc1c3cccc1)cc2)C	6.53
CHEMBL288285	Oc1ccc2c(c1)C1(C)CCN(C(C2)C1C)CCN1CCOCC1	7.87
CHEMBL5278788	CCC1C2Cc3c(C1CCN2Cc1ccccc1)cccc3	8.47
CHEMBL5275160	Nc1ccc2c(c1)C1(C)CCN(C(C2)C1C)Cc1ccccc1	8.83
CHEMBL5275443	COc1ccc(cc1NC(=O)OC1CC2CCCC(C1)N2CCCCCCCCCCS(=O)(=O)c1cccc2c1cccc2N(C)C)C	8.98
CHEMBL5280109	CN(c1ccc2c(c1)C(=O)N(C2=O)CCCn1cc(c2c1cccc2)CCCCN1CCC2(CC1)OCc1c2cccc1)C	7.41
CHEMBL5282093	CN1CCC(CC1c1ccccc1)CCN1CCN(CC1)c1ccccc1	7.57
CHEMBL5284154	CC1C2Cc3c(C1(C)CCN2Cc1ccccc1)cccc3	7.74
CHEMBL5283909	COc1ccc(cc1NC(=O)OC1CC2CCCC(C1)N2CCCCCCCCCCNc1ccc(c2c1non2)[N+](=O)[O-])C	6.35
CHEMBL5280576	CC(=CCN1CCC2(C(C1Cc1c2c(Cl)c(cc1)O)C)C)C	8.58
CHEMBL5289055	CC(=CCN1CCC2(C(C1Cc1c2c(Br)c(cc1)O)C)C)C	8.6
CHEMBL5285753	CC1C2Cc3c(C1(C)CCN2Cc1ccccc1)c(Br)c(cc3)O	8.76
CHEMBL5268414	Oc1ccc2c(c1)C1(C)CCN(C(C2)C1C)Cc1ccccc1F	9.01
CHEMBL290675	Oc1ccc2c(c1)C1(C)CCN(C(C2)C1C)CCN1CCCCCC1	7.7
CHEMBL5267888	CCCCCCCNCCC1CCN(C(C1)c1ccccc1)C	7.8
CHEMBL5277371	CN(Cc1ccccc1)CCC1CCN(C(C1)c1ccccc1)C	7.72
CHEMBL5279451	OCCC1CN(CC)CCN1Cc1cccc2c1cccc2	8.885
CHEMBL5291479	CN1CCC(CC1c1ccccc1)CCNCc1ccccc1	8.1
CHEMBL5278314	COc1cccc(c1C1CCC(CC1)N1CCN(CC1)C1CCCCC1)OC	9.59
CHEMBL5271242	CC(c1ccc(cc1)c1ccccc1)CCN1CCC(CC1)NC(=O)COCCOCC(=O)NC1CCN(CC1)CCC(c1ccc(cc1)c1ccccc1)C	8.59
CHEMBL5285446	CC(c1ccc(cc1)c1ccccc1)CCN1CCC(CC1)NC(=O)c1ccccc1C(=O)NC1CCN(CC1)CCC(c1ccc(cc1)c1ccccc1)C	6.87
CHEMBL1822601	Fc1cccc(c1C1CCC(CC1)N1CCN(CC1)C1CCCCC1)F	9.2
CHEMBL5275525	CC(=CCN1CCC2(C(C1Cc1c2cc(cc1)F)C)C)C	8.83
CHEMBL5291017	c1ccc(cc1)CNCCC1CCNC(C1)c1ccccc1	6.78
CHEMBL5284210	COc1cc2CCN(Cc2cc1OC)CCCN1CCc2c(C1=O)cccc2OCCCCCCN1C(=O)c2c(C1=O)cc(cc2)N(C)C	5.3
CHEMBL5271751	C(CN1CCC2(CC1)OCc1c2cccc1)CCn1ccc2c1cccc2	7.56
CHEMBL5282359	CC1C2Cc3c(C1CCN2Cc1ccccc1)cccc3	9.02
CHEMBL5269358	CC1C2Cc3c(C1(C)CCN2Cc1ccccc1)cc(c(c3)I)O	6.64
CHEMBL5280959	CC(c1ccc(cc1)c1ccccc1)CCN1CCC(CC1)NC(=O)CC(=O)NC1CCN(CC1)CCC(c1ccc(cc1)c1ccccc1)C	6.7
CHEMBL5272056	CC(c1ccc(cc1)c1ccccc1)CCN1CCC(CC1)NC(=O)CCCC(=O)NC1CCN(CC1)CCC(c1ccc(cc1)c1ccccc1)C	6.21
CHEMBL43398	Oc1ccc2c(c1)C1(C)CCN(C(C2)C1C)CCN1CCCC1	8.13
CHEMBL5283424	C1CCC2(CC1)SCC(S2)CN1CCN(CC1)Cc1ccccc1	8.21
CHEMBL5291126	CC(C1C2Cc3c(C1CCN2Cc1ccccc1)cccc3)C	7.5
