# Supplementary material for: SIGMAP: an explainable artificial intelligence tool for SIGMA-1 receptor affinity prediction
Source: RSC Med Chem. 2024 Nov 8;16(2):835–48. doi: 10.1039/d4md00722k (PMC11605305; doi:10.1039/d4md00722k)
Supplement: MD-016-D4MD00722K-s004 [file MD-016-D4MD00722K-s004.xlsx]

## Sheet: default_1
Molecule ChEMBL ID	SMILES	pKi(mean)
CHEMBL4632765	Brc1cc2c(s1)CCC(CC2)NCCCc1ccccc1	7.39
CHEMBL1170879	Brc1ccc(cc1)C1(O)CCN(CC1)Cc1c[nH]c2c1cccn2	7.82
CHEMBL1172210	Brc1ccc(cc1)C1(O)CCN(CC1)Cc1cc2c(o1)cccc2	8.61
CHEMBL1172213	Brc1ccc(cc1)C1(O)CCN(CC1)Cc1coc2c1cccc2	9.23
CHEMBL2391070	Brc1cccc(c1)CS(=O)(=O)N1CCC(CC1)Cc1ccccc1	8.8
CHEMBL2391060	Brc1cccc(c1)CS(=O)(=O)N1CCN(CC1)Cc1ccccc1	7.52
CHEMBL270474	Brc1ccccc1CN1CCN(CC1)CCCc1ccccc1	9.22
CHEMBL2436339	C(CC1CCCc2c1ccs2)NCc1ccccc1	7.31
CHEMBL4757626	C(CCCc1ccccc1)NCCC1CCCC(C1)c1ccccc1	8.52
CHEMBL4875521	C(CCCc1ccccc1)NCCC1CCCC(O1)c1ccccc1	7.68
CHEMBL4072342	C(CCN1CCCC(C1)c1ccccc1)CCc1ccccc1	9.85
CHEMBL4646690	C(CCc1ccccc1)CNC1CCc2c(CC1)ccs2	7.21
CHEMBL4800530	C(CCc1ccccc1)CNC1Cc2c(C1)cccc2	7.51
CHEMBL4743313	C(NC1CCC1)COc1noc(c1)COc1ccccc1	9.7
CHEMBL1917710	C/C(=C\CN1CCC(CC1)Cc1ccccc1)/c1ccc(cc1)c1ccccc1	8.15
CHEMBL1917705	C/C(=C\CN1CCCCC1)/c1ccc(cc1)c1ccccc1	9.07
CHEMBL1917714	C/C(=C\CN1CCOCC1)/c1ccc2c(c1)cccc2	8.02
CHEMBL1824784	C1C2CC3N(C1CC(C2)C3)Cc1ccccc1	7.54
CHEMBL4741910	C1CC(CCN2CCCC2)CC(C1)c1ccccc1	8.57
CHEMBL4857336	C1CC(CCN2CCCC2)OC(C1)c1ccccc1	7.365
CHEMBL3770532	C1CCC(CC1)C1(OCC(O1)CN1CCN(CC1)Cc1ccccc1)C1CCCCC1	8.47
CHEMBL574821	C1CCC(CC1)CCCN1CCN(CC1)C1CCCCC1	9.6
CHEMBL4760592	C1CCC(CC1)CN1CCC(c2c(C1)cccc2)Cc1ccccc1	8.62
CHEMBL3220587	C1CCC(CC1)CN1CCC2(CC1)CCCc1c2ccs1	8.37
CHEMBL2064199	C1CCC(CC1)CN1CCC2(CC1)OC=Cc1c2ccs1	8.77
CHEMBL1170964	C1CCC(CC1)CN1CCC2(CC1)OCCc1c2ccs1	8.86667
CHEMBL1171555	C1CCC(CC1)CN1CCC2(CC1)OCCc1c2cnn1c1ccccc1	8.80667
CHEMBL4562511	C1CCC(CC1)CNC1CCC2(CC1)OC=Cc1c2cccc1	8.08
CHEMBL4761627	C1CCC(CC1)CNC1CCCC2(C1)OCCc1c2cccc1	8.27
CHEMBL2436337	C1CCC(CC1)CNCCC1CCCc2c1ccs2	8.3
CHEMBL573703	C1CCC(CC1)N1CCN(CC1)C1CCCCC1	8.69
CHEMBL76758	C1CCC(CC1)N1CCN(CC1)CCCCC1CCCc2c1cccc2	10.44
CHEMBL26479	C1CCC(NC1)C1COC(O1)(c1ccccc1)c1ccccc1	7.46
CHEMBL3769904	C1CCC2(CC1)OCC(O2)CN1CCC(CC1)Cc1ccccc1	8.7
CHEMBL4633796	C1CCC2(CC1)SCC(O2)CN1CCN(CC1)Cc1ccccc1	8.89
CHEMBL4645500	C1CCC2(CC1)SCC(S2)CN1CCC(CC1)Cc1ccccc1	7.92
CHEMBL406018	C1CCN(CC1)CCC1CCc2c1cnn2c1ccccc1	8.96
CHEMBL20188	C1CCN(CC1)CCCCCc1ccccc1	9.42
CHEMBL3359231	C1CCN(CC1)CCCOc1nc(nc2c1CCC2)c1ccccc1	7.35
CHEMBL3360027	C1COc2c(OC1)ccc(c2)CCN1CCN(CC1)CCCc1ccccc1	7.72
CHEMBL489601	C=CC(=O)OC(Cc1ccccc1)CN1CCN(CC1)CCCN(c1ccc(cc1)F)c1ccc(cc1)F	7.34
CHEMBL496753	C=CC(=O)OC(c1ccccc1)CCN1CCN(CC1)CCCN(c1ccc(cc1)F)c1ccc(cc1)F	7.06
CHEMBL4075349	C=CC1CN(CCCCc2ccccc2)CCc2c1cc(O)cc2	7.32
CHEMBL468930	C=CCC1OC2(c3c1cccc3)CCN(CC2)Cc1ccc(cc1)F	8.85
CHEMBL456452	C=CCN1CC2CCCC1CN2Cc1ccc(cc1)OC	7.765
CHEMBL3360022	C=CCOc1ccc(cc1OC)CCN1CCN(CC1)CCCc1ccccc1	7.52
CHEMBL1829674	CC(=C)CCN1CCC2(CC1)OCCc1c2cnn1C	7.85
CHEMBL4077724	CC(=C)CN1CCN(CC1)c1ccc2c(c1)C1CCN(C2C1)C(=O)OCc1ccccc1	7.73
CHEMBL4162416	CC(=C)CN1CCN(CC1)c1ccc2c(c1)CN(CCC2)C(=O)OCc1ccccc1	7.32
CHEMBL60542	CC(=CCN1CCC2(C(C1Cc1c2cc(cc1)O)C)C)C	8.32521
CHEMBL1171726	CC(=CCN1CCC2(CC1)OCCc1c2cnn1C)C	8.245
CHEMBL4098070	CC(=CCN1CCCN(C(C1)Cc1ccccc1)Cc1ccccc1)C	8.3
CHEMBL2064189	CC(=O)CC1Cc2sccc2C2(O1)CCN(CC2)Cc1ccccc1	8.17
CHEMBL4641869	CC(=O)CN1CCN(CC1)CCSC(c1ccc(cc1)F)c1ccc(cc1)F	8.97
CHEMBL495726	CC(=O)OC(Cc1ccccc1)CN1CCN(CC1)CCCN(c1ccc(cc1)F)c1ccc(cc1)F	7.12
CHEMBL498600	CC(=O)OC(c1ccccc1)CCN1CCN(CC1)CCCN(c1ccc(cc1)F)c1ccc(cc1)F	7.25
CHEMBL4099831	CC(C1CN(CCCN1Cc1ccccc1)CC1CCCCC1)C	8.22
CHEMBL4240868	CC(CCN1CCC2(CC1)CCCc1c2cccc1)C	8.74
CHEMBL1829673	CC(CCN1CCC2(CC1)OCCc1c2cnn1C)C	7.52
CHEMBL1829670	CC(CCN1CCC2(CC1)OCCc1c2cnn1c1ccccc1)C	9.01
CHEMBL3948140	CC(CCN1CCC2C3C1CCCC3C(C(=O)C2)Cc1ccccc1)C	8.7
CHEMBL4250984	CC(CCN1CC[Si]2(CC1)CCCc1c2cccc1)C	9.52
CHEMBL4636778	CC(CN1C(C)CN(CC1C)CCSC(c1ccc(cc1)F)c1ccc(cc1)F)O	8.3475
CHEMBL4634263	CC(CN1CCC2(C1)CCN(CC2)CC[S+](C(c1ccc(cc1)F)c1ccc(cc1)F)[O-])O	7.19
CHEMBL4638977	CC(CN1CCN(CC1)CCSC(c1ccc(cc1)F)c1ccc(cc1)F)O	8.5375
CHEMBL372700	CC(Cc1ccc(cc1)C(C)(C)C)CN1CC(C)OC(C1)C	10.6733
CHEMBL280160	CC(Cc1ccccc1)NCCCCCc1ccccc1	9.175
CHEMBL3805711	CC(N(C(C)C)CCCOc1ccc(=O)n(n1)c1ccccc1)C	7.01
CHEMBL555790	CC(N1CCC(CC1)C)COc1ccc(cc1)Cl	9.2
CHEMBL5075339	CC(N1CCC(CC1)Cc1ccccc1)CN(C(=O)c1ccco1)c1ccccc1	7.46
CHEMBL4099359	CC(OC(=O)C1(CC1CN1CCC(CC1)(O)c1ccc(cc1)Cl)c1ccccc1)C	7.5975
CHEMBL3621974	CC(c1ccc(cc1)c1ccccc1)(CCN1CCCCC1)O	7.97333
CHEMBL224095	CC(c1ccc(cc1)c1ccccc1)CCN(C)C	8.99
CHEMBL1917719	CC(c1ccc(cc1)c1ccccc1)CCN1CCCCC1	8.88
CHEMBL4799971	CC(c1ccc(cc1)c1nc(nn1C)CN1CCCC1)(C)C	8.52
CHEMBL3913410	CC(c1ccc2c(c1)cccc2)(CCN1CCC(CC1)Cc1ccccc1)O	8.04
CHEMBL3961445	CC(c1ccc2c(c1)cccc2)CCN1CCOCC1	8.27
CHEMBL3890800	CC(c1ccccc1)CCN1CCC(CC1)Cc1ccccc1	8.605
CHEMBL1939703	CC(c1ccccc1)N1CCC2(CC1)OC(c1c2cccc1)C	8.04
CHEMBL1929276	CC1(C)CCCN(C1)CCCC1CCCc2c1cc[nH]2	7.57
CHEMBL1929279	CC1(C)CCCN(C1)CCCC1CCCc2c1ccs2	9.68
CHEMBL1929287	CC1(C)CCCN(C1)CCCCC1CCCCC1	8.99
CHEMBL1929275	CC1(C)CCCN(C1)CCCCC1CCc2c1cccc2	8.76
CHEMBL1929430	CC1(C)CCCN(C1)CCCCN1CCCC(C1)(C)C	7.85
CHEMBL1929286	CC1(C)CCCN(C1)CCCc1c[nH]c2c1cccc2	7.38
CHEMBL1929277	CC1(C)CCCN(C1)CCCc1cccc2c1cco2	7.2
CHEMBL1929278	CC1(C)CCCN(C1)CCCc1cccc2c1ccs2	7.28
CHEMBL1929284	CC1(C)CCCN(C1)CCCn1ccc2c1cccc2	7.29
CHEMBL2170314	CC1(OCCC(O1)CCNCc1ccccc1)c1ccccc1	7.865
CHEMBL3806181	CC1CC(C)CN(C1)CCCOc1ccc(=O)n(n1)c1ccccc1	7.34
CHEMBL5084203	CC1CCCC(N1CCOc1ccc(cc1)Cl)C	7.23
CHEMBL3765740	CC1CCN(CC1)CCCCC1CCCc2c1ccc(c2)OCCCCCCN1C(=O)c2c(C1=O)cc(cc2)N(C)C	8.44
CHEMBL304079	CC1CCN(CC1)CCCCCc1ccccc1	10.15
CHEMBL3763396	CC1CCN(CC1)CCCCc1cccc2c1ccc(c2)OCCCCCCN1C(=O)c2c(C1=O)cc(cc2)N(C)C	8.28
CHEMBL3358641	CC1CCN(CC1)CCCOc1cc(C)nc(n1)c1ccccc1	7.78
CHEMBL3804913	CC1CCN(CC1)CCCOc1ccc(=O)n(n1)c1cc(Cl)cc(c1)Cl	7.37
CHEMBL3805978	CC1CCN(CC1)CCCOc1ccc(=O)n(n1)c1cc(Cl)ccc1Cl	7.22
CHEMBL3805844	CC1CCN(CC1)CCCOc1ccc(=O)n(n1)c1ccc(c(c1)Cl)F	8
CHEMBL3806318	CC1CCN(CC1)CCCOc1ccc(=O)n(n1)c1ccc(cc1)C	7.21
CHEMBL3805155	CC1CCN(CC1)CCCOc1ccc(=O)n(n1)c1ccc(cc1)F	7.7
CHEMBL3805750	CC1CCN(CC1)CCCOc1ccc(=O)n(n1)c1ccc2c(c1)cccc2	7.08
CHEMBL3805912	CC1CCN(CC1)CCCOc1ccc(=O)n(n1)c1cccc(c1Cl)Cl	7.26
CHEMBL3806258	CC1CCN(CC1)CCCOc1ccc(=O)n(n1)c1ccccc1	7.55
CHEMBL3235461	CC1CCN(CC1)CCCOc1ccc2c(c1)N(C)C(=O)CC2	7.4
CHEMBL3235459	CC1CCN(CC1)CCCOc1ccc2c(c1)N(Cc1ccc(cc1)F)C(=O)CC2	9.11
CHEMBL3235447	CC1CCN(CC1)CCCOc1ccc2c(c1)N(Cc1ccccc1)C(=O)CC2	8.96
CHEMBL3235460	CC1CCN(CC1)CCCOc1ccc2c(c1)NC(=O)CC2	7.18
CHEMBL3786384	CC1CCN(CC1)CCCOc1nc(nc2c1CCC2)c1ccc(cc1)Cl	7.68
CHEMBL3786154	CC1CCN(CC1)CCCOc1nc(nc2c1CCCC2)c1ccc(cc1)C	7.62
CHEMBL3786829	CC1CCN(CC1)CCCOc1nc(nc2c1CCCC2)c1ccc(cc1)C(F)(F)F	7.53
CHEMBL3786776	CC1CCN(CC1)CCCOc1nc(nc2c1CCCC2)c1ccccc1	7.59
CHEMBL543821	CC1CCN(CC1)CCOc1ccc(cc1)Cl	9.07
CHEMBL4073697	CC1CN(CCCCc2ccccc2)CCCN1Cc1ccccc1	9.095
CHEMBL4062642	CC1CN(CCCN1Cc1ccccc1)CC1CCCCC1	9.54
CHEMBL3358642	CC1CN(CCCOc2cc(C)nc(n2)c2ccccc2)CC(C1)C	7.52
CHEMBL4797585	CCC(=O)N(C(c1ccccc1)C)CCN1CCC(CC1)Cc1ccccc1	7.76
CHEMBL5188409	CCC(=O)N(C1CCN(CC1)CCc1ccccc1)CCc1ccccc1	8.14
CHEMBL5204843	CCC(=O)N(C1CCN(CC1)CCc1ccccc1)Cc1ccc(cc1)C	7.17
CHEMBL5182504	CCC(=O)N(C1CCN(CC1)CCc1ccccc1)Cc1ccc(cc1)Cl	7.54
CHEMBL5208375	CCC(=O)N(C1CCN(CC1)CCc1ccccc1)Cc1ccc(cc1)F	7.62
CHEMBL5191081	CCC(=O)N(C1CCN(CC1)CCc1ccccc1)Cc1ccc(cc1F)F	7.2
CHEMBL5202810	CCC(=O)N(C1CCN(CC1)CCc1ccccc1)Cc1cccc(c1)F	7.7
CHEMBL5179620	CCC(=O)N(C1CCN(CC1)CCc1ccccc1)Cc1ccccc1F	7.11
CHEMBL5182393	CCC(=O)N(C1CCN(CC1)Cc1ccccc1)CCc1ccccc1	8.48
CHEMBL5198980	CCC(=O)N(C1CCN(CC1)Cc1ccccc1)Cc1ccccc1	7.63
CHEMBL5078392	CCC(=O)N(CC(N1CCC(CC1)Cc1ccccc1)C)Cc1ccccc1	7.52
CHEMBL4792467	CCC(=O)N(Cc1ccccc1)CCN1CCC(CC1)Cc1ccccc1	7.73
CHEMBL5079004	CCC(=O)N(c1ccc(cc1)Br)CC(N1CCC(CC1)Cc1ccccc1)C	7.1
CHEMBL4789528	CCC(=O)N(c1ccc(cc1)C)CCN1CCC(CC1)Cc1ccc(cc1)F	8.62
CHEMBL4778918	CCC(=O)N(c1ccc(cc1)C)CCN1CCC(CC1)Cc1ccccc1	8.8
CHEMBL5086596	CCC(=O)N(c1ccc(cc1)Cl)CC(N1CCC(CC1)Cc1ccccc1)C	7.17
CHEMBL5079619	CCC(=O)N(c1ccc(cc1)F)CC(N1CCC(CC1)Cc1ccccc1)C	8.26
CHEMBL4776178	CCC(=O)N(c1ccc(cc1)F)CCN1CCC(CC1)Cc1ccc(cc1)F	8.89
CHEMBL4779284	CCC(=O)N(c1ccc(cc1)OC)CCCCCN1CCC(CC1)Cc1ccccc1	7.38
CHEMBL4790304	CCC(=O)N(c1ccc(cc1)OC)CCN1CCC(CC1)Cc1ccc(cc1)C	7.46
CHEMBL4797982	CCC(=O)N(c1ccc(cc1)OC)CCN1CCC(CC1)Cc1ccccc1	8.82
CHEMBL4783182	CCC(=O)N(c1ccc(cc1)OC)CCN1CCC(CC1)c1ccccc1	7.41
CHEMBL5078411	CCC(=O)N(c1cccc2c1cccc2)CC(N1CCC(CC1)Cc1ccccc1)C	7.64
CHEMBL5087369	CCC(=O)N(c1ccccc1)CC(N1CCC(CC1)CCCc1ccccc1)C	7.22
CHEMBL5087973	CCC(=O)N(c1ccccc1)CC(N1CCC(CC1)Cc1ccccc1)C	7.6225
CHEMBL4788719	CCC(=O)N(c1ccccc1)CCN1CCC(CC1)Cc1ccccc1	7.41
CHEMBL4638203	CCC(=O)N1CCN(CC1)CCSC(c1ccc(cc1)F)c1ccc(cc1)F	7.48
CHEMBL490424	CCC(=O)OC(Cc1ccccc1)CN1CCN(CC1)CCCN(c1ccc(cc1)F)c1ccc(cc1)F	7.09
CHEMBL497586	CCC(=O)OC(c1ccccc1)CCN1CCN(CC1)CCCN(c1ccc(cc1)F)c1ccc(cc1)F	7.12
CHEMBL274010	CCC(=O)c1ccc2c(c1)oc(=O)n2CCCN1CCCCC1	8.07
CHEMBL14875	CCC(=O)c1ccc2c(c1)sc(=O)n2CCCN1CCCCC1	8.64
CHEMBL2170178	CCC1(OCCC(O1)CCNCc1ccccc1)c1ccccc1	7.60667
CHEMBL3890935	CCC1C(=O)CC2C3C1CCCC3N(CC2)CC1CCCCC1	8.4
CHEMBL3918997	CCC1C(=O)CC2C3C1CCCC3N(CC2)CCC(C)C	8.4
CHEMBL3946273	CCC1C(=O)CC2C3C1CCCC3N(CC2)Cc1cccs1	8.22
CHEMBL1172686	CCC1Cc2ccccc2C2(O1)CCN(CC2)Cc1ccccc1	7.73
CHEMBL5174391	CCCC(=O)N(C1CCN(CC1)CCc1ccccc1)Cc1ccc(cc1)F	7.62
CHEMBL5190421	CCCC(=O)N(C1CCN(CC1)CCc1ccccc1)Cc1cccc(c1)F	7.13
CHEMBL4747257	CCCC(C(=O)OC(c1ccc(cc1)F)CCCN1CCC(CC1)(O)c1ccc(cc1)Cl)CCC	7.6925
CHEMBL2170180	CCCC1(OCCC(O1)CCNCc1ccccc1)c1ccccc1	7.005
CHEMBL1645217	CCCC1OC2(c3c1cccc3)CCN(CC2)C(c1ccccc1)C	7.66
CHEMBL1171419	CCCC1OC2(c3c1cccc3)CCN(CC2)Cc1ccccc1	8.36333
CHEMBL3354065	CCCCC1CCN(CC1)CCCN1C(=O)CCc2c1cccc2	8.14
CHEMBL3397616	CCCCCC(NC(=O)C1CCN(CC1)Cc1ccc(cc1)Cl)C	7.7
CHEMBL3397612	CCCCCC(NC(=O)C1CCN(CC1)Cc1ccccc1)C	7.72
CHEMBL2034985	CCCCCCCCN1CCC2(C1)OC(OC)Cc1c2cccc1	8.03
CHEMBL3827403	CCCCCCCCN1CCC2(CC1)OC(CCO)Cc1c2cccc1	7.48667
CHEMBL574235	CCCCCCCCN1CCC2(CC1)OC(c1c2cccc1)CCCF	7.43
CHEMBL1645215	CCCCCCCCN1CCC2(CC1)OC(c1c2cccc1)CCO	7.66
CHEMBL3958393	CCCCCCCN1CCC2C3C1CCCC3C(C(=O)C2)CC	8.7
CHEMBL4093106	CCCCCCN(CCc1ccccc1)C	7.32
CHEMBL495071	CCCCCN1CCC2(CC1)OC(OC)Cc1c2ccs1	8.8
CHEMBL1829579	CCCCCN1CCC2(CC1)OC(OC)Cc1c2cnn1c1ccccc1	9.09
CHEMBL1163967	CCCCN(CCCC)CCCc1ccc(cc1)F	7.75
CHEMBL1163765	CCCCN(CCCC)CCCc1ccc(cc1)[N+](=O)[O-]	9.52
CHEMBL11493	CCCCN1C2CCC1CC(C2)OC(c1ccc(cc1)F)c1ccc(cc1)F	8.62
CHEMBL395069	CCCCN1CC2CCC(C1CN2Cc1ccccc1)O	7.63
CHEMBL244650	CCCCN1CC2CCC(C1CN2Cc1ccccc1)OC	7.88
CHEMBL429103	CCCCN1CC2CCC(C1CN2Cc1ccccc1)OCc1ccccc1	7.4
CHEMBL2035280	CCCCN1CCC2(C1)OC(c1c2cccc1)OC	7.26
CHEMBL3220588	CCCCN1CCC2(CC1)CCCc1c2ccs1	8.2
CHEMBL3827955	CCCCN1CCC2(CC1)OC(CCO)Cc1c2cccc1	7.22
CHEMBL577956	CCCCN1CCC2(CC1)OC(OC)Cc1c2cccc1	8.64
CHEMBL494870	CCCCN1CCC2(CC1)OC(OC)Cc1c2ccs1	8.37
CHEMBL573163	CCCCN1CCC2(CC1)OC(c1c2cccc1)CCCF	8.35
CHEMBL1645213	CCCCN1CCC2(CC1)OC(c1c2cccc1)CCO	7.49
CHEMBL259732	CCCCN1CCC2(CC1)OC(c1c2cnn1c1ccccc1)OC	8.89
CHEMBL4063826	CCCCN1CCCN(C(C1)C)Cc1ccccc1	9.32
CHEMBL4075547	CCCCN1CCCN(C(C1)Cc1ccccc1)CCCCc1ccccc1	8.05
CHEMBL4090350	CCCCN1CCCN(C(C1)Cc1ccccc1)Cc1ccccc1	8.42
CHEMBL310240	CCCCN1CCN(CC1)CCc1ccc(c(c1)Cl)Cl	9.26
CHEMBL2435433	CCCCNC(c1cc2C=CC(Oc2cc1OC)(C)C)C	7.66
CHEMBL2435443	CCCCNC(c1cc2CCC(Oc2cc1OC)(C)C)C	7.37
CHEMBL2260850	CCCCc1ccc2c(c1)sc(=O)n2CCN1CCCCC1	8.43
CHEMBL3359210	CCCN(CCC)CCCOc1cc(C)nc(n1)c1ccccc1	7.41
CHEMBL20348	CCCN(CCCCCc1ccccc1)C	9.54
CHEMBL190883	CCCN(CCc1ccc(c(c1)OCCc1ccccc1)OC)CCC	8.86667
CHEMBL1163919	CCCN(CCc1ccc(cc1)N)CCCc1ccc(cc1)[N+](=O)[O-]	8.22
CHEMBL1172059	CCCN1CCC2(CC1)OC(OC)Cc1c2cnn1c1ccccc1	7.21333
CHEMBL3908975	CCCN1CCC2C3C1CCCC3C(C(=O)C2)CC	7.96
CHEMBL3898676	CCCN1CCC2C3C1CCCC3C(C(=O)C2)Cc1ccc(cc1)OC	8.05
CHEMBL3954961	CCCN1CCC2C3C1CCCC3C(C(=O)C2)Cc1ccccc1	9
CHEMBL3981067	CCCN1CCC2C3C1CCCC3C(C(C2)O)CC	7.26
CHEMBL3970903	CCCN1CCC2C3C1CCCC3C(c1c2cc2ccccc2n1)CC	7.15
CHEMBL3889737	CCCN1CCC2C3C1CCCC3C1(C(=Nc3c1cccc3)C2)CC	8.15
CHEMBL4088272	CCCN1CCC=C(C1)c1onc(c1)c1ccc(cc1)C	8.37
CHEMBL4099261	CCCN1CCN(CC1)c1ccc2c(c1)C1CCN(C2C1)C(=O)OCc1ccccc1	8.06
CHEMBL1163968	CCCNCCCc1ccc(cc1)F	7.04
CHEMBL4075797	CCCOC(=O)C1(CC1CN1CCC(CC1)(O)c1ccc(cc1)Cl)c1ccccc1	7.785
CHEMBL2069965	CCCOc1ccc(cc1)CN1CCN(C1)Cc1cc2c(o1)cccc2	7.27
CHEMBL3360020	CCCOc1ccc(cc1OC)CCN1CCN(CC1)CCCc1ccccc1	7.59
CHEMBL3359222	CCCc1cc(OCCCN2CCCC2)nc(n1)c1ccccc1	7.41
CHEMBL2260847	CCCc1ccc2c(c1)OCC(=O)N2CCN1CCCCC1	7.55
CHEMBL2260852	CCCc1ccc2c(c1)sc(=O)n2CCCCN1CCCCC1	8.54
CHEMBL2260846	CCCc1ccc2c(c1)sc(=O)n2CCN1CC2(C(C1)(C)CCC2)C	8.85
CHEMBL4641623	CCN(C1CCc2c(CC1)ccs2)CCCCc1ccccc1	7.92
CHEMBL4644644	CCN(C1CCc2c(CC1)ccs2)CCc1ccccc1	7.23
CHEMBL4647186	CCN(C1CCc2c(CC1)ccs2)Cc1ccccc1	7.22
CHEMBL3355378	CCN(C1CCc2c1ccc(c2OC)OC)CCCCc1cn(c2c1cccc2)c1ccc(cc1)F	7.14
CHEMBL3358654	CCN(CCCOc1cc(C)nc(n1)c1ccccc1)CC	7.33
CHEMBL3805873	CCN(CCCOc1ccc(=O)n(n1)c1ccccc1)CC	7.02
CHEMBL3235453	CCN(CCCOc1ccc2c(c1)N(Cc1ccccc1)C(=O)CC2)CC	7.4
CHEMBL3786813	CCN(CCCOc1nc(nc2c1CCC2)c1ccccc1)CC	7.2
CHEMBL3352847	CCN(Cc1ccc(c(c1)OC)OC)CCCCc1cn(c2c1cccc2)c1ccc(cc1)F	7.72
CHEMBL3355371	CCN(Cc1cccc(c1)OC)CCCCc1cn(c2c1cccc2)c1ccc(cc1)F	8.61
CHEMBL4781352	CCN1CC2(CCN(CC2)CCc2cc(F)ccc2F)OC(C1=O)C	7.19
CHEMBL575238	CCN1CCN(CC1)C1CCCCC1	7.2
CHEMBL3358648	CCN1CCN(CC1)CCCOc1cc(C)nc(n1)c1ccccc1	7.51
CHEMBL3805069	CCN1CCN(CC1)CCCOc1ccc(=O)n(n1)c1ccccc1	7.4
CHEMBL2435432	CCNC(c1cc2C=CC(Oc2cc1OC)(C)C)C	7.08
CHEMBL4081337	CCOC(=O)C1(CC1CN1CCC(CC1)(O)c1ccc(cc1)Cl)c1ccccc1	7.7125
CHEMBL4168393	CCOC(=O)CC1Cc2ccccc2C2(O1)CCC(CC2)N1CCN(CC1)C1CCCCC1	7.92
CHEMBL1170773	CCOC(=O)CC1Cc2sccc2C2(O1)CCN(CC2)Cc1ccccc1	7.88667
CHEMBL1172094	CCOC(=O)CC1OC2(c3c1cccc3)CCN(CC2)Cc1ccccc1	7.39
CHEMBL4796613	CCOC1(CCN(CC1)Cc1ccccc1)c1ncc(s1)c1cccnc1	8.89
CHEMBL4459303	CCOC1Cc2ccccc2C2(O1)CCC(CC2)N(CC1CCCCC1)C	7.955
CHEMBL4562728	CCOC1Cc2ccccc2C2(O1)CCC(CC2)NCC1CCCCC1	7.09
CHEMBL2069963	CCOc1ccc(cc1)CN1CCN(C1)Cc1cc2c(o1)cccc2	7.71
CHEMBL3359221	CCc1cc(OCCCN2CCCC2)nc(n1)c1ccccc1	7.65
CHEMBL448782	CN(C/C=C(/c1ccc(cc1)c1ccccc1)\C)C	8.85
CHEMBL1917694	CN(C/C=C(/c1ccc2c(c1)cccc2)\C)C	7.7
CHEMBL5178401	CN(C1CC2CC1N(CC2)C(=O)Cc1ccc(c(c1)Cl)Cl)C	7.15
CHEMBL4454365	CN(C1CCC2(CC1)OC=Cc1c2cccc1)CC1CCCCC1	8.475
CHEMBL4792455	CN(C1CCCC2(C1)OCCc1c2cccc1)CC1CCCCC1	7.82
CHEMBL4784393	CN(C1CCN(CC1)C(=O)c1ccccc1F)CCSC(c1ccc(cc1)F)c1ccc(cc1)F	8.23
CHEMBL4473586	CN(C1CCc2c(C(C1)O)cccc2)CCCc1ccccc1	7.41
CHEMBL4648500	CN(C1CCc2c(CC1)ccs2)CCCCc1ccccc1	7.77
CHEMBL4647243	CN(C1CCc2c(CC1)ccs2)Cc1ccccc1	7.31
CHEMBL1172492	CN(CC1Cc2sccc2C2(O1)CCN(CC2)Cc1ccccc1)C	7.2
CHEMBL224588	CN(CCC(c1ccc2c(c1)ccc(c2)O)C)C	7.72
CHEMBL224855	CN(CCC(c1ccc2c(c1)cccc2)C)C	8.71
CHEMBL387519	CN(CCC(c1cccc2c1cccc2)C)C	7.33
CHEMBL4751986	CN(CCC1CCCC(C1)c1ccccc1)C	8.07667
CHEMBL376808	CN(CCCC(c1ccc2c(c1)cccc2)(O)C)C	7.6
CHEMBL3358653	CN(CCCOc1cc(C)nc(n1)c1ccccc1)C	7.08
CHEMBL3235452	CN(CCCOc1ccc2c(c1)N(Cc1ccccc1)C(=O)CC2)C	7.08
CHEMBL19544	CN(CCc1ccccc1)CCCCCc1ccccc1	9.6
CHEMBL3913418	CN(Cc1ccc(cc1)Cl)CCCCN1C(=O)CCc2c1cccc2	7.48
CHEMBL3984272	CN(Cc1ccc(cc1)Cl)CCCCN1C(=O)COc2c1cccc2	7.8
CHEMBL3895475	CN(Cc1ccc(cc1)Cl)CCCCN1C(=O)CSc2c1cccc2	7.89
CHEMBL3946295	CN(Cc1ccc(cc1)Cl)CCCCN1C(=O)OCC1c1ccccc1	8.53
CHEMBL3904413	CN(Cc1ccc(cc1)Cl)CCCCn1nc(oc1=O)c1ccccc1	7.73
CHEMBL4533030	CN(Cc1ccc(cc1C)C)CCCCN1C(=O)CCc2c1cccc2	7.22
CHEMBL4446431	CN(Cc1ccc(cc1C)C)CCCCn1nc(oc1=O)c1ccccc1	7.7
CHEMBL1917697	CN(Cc1ccccc1)C/C=C(/c1ccc(cc1)c1ccccc1)\C	8.2
CHEMBL1917696	CN(Cc1ccccc1)C/C=C(/c1ccc2c(c1)cccc2)\C	8.1
CHEMBL224151	CN(Cc1ccccc1)CCC(c1ccc(cc1)c1ccccc1)C	8.24
CHEMBL387955	CN(Cc1ccccc1)CCC(c1ccc2c(c1)cccc2)C	8.27
CHEMBL3966773	CN(Cc1ccccc1)CCCCN1C(=O)CCCc2c1cccc2	8.05
CHEMBL3975268	CN(Cc1ccccc1)CCCCN1C(=O)CCc2c1cccc2	7.8
CHEMBL3983252	CN(Cc1ccccc1)CCCCN1C(=O)COc2c1cccc2	7.52
CHEMBL3955644	CN(Cc1ccccc1)CCCCN1C(=O)CSc2c1cccc2	8.3
CHEMBL3964384	CN(Cc1ccccc1)CCCCN1C(=O)OCC1c1ccccc1	8.09333
CHEMBL3975617	CN(Cc1ccccc1)CCCCn1nc(oc1=O)c1ccccc1	8.28
CHEMBL4800218	CN(Cc1nn(c(n1)c1ccc(cc1)C(C)(C)C)C)CC1CC1	9.21
CHEMBL3763740	CN(c1ccc2c(c1)C(=O)N(C2=O)CCCCCCOc1ccc2c(c1)CCCC2CCC(=O)N1CCN(CC1)C1CCCCC1)C	7.88
CHEMBL3259962	CN(c1ccc2c(c1)C(=O)N(C2=O)CCCCCCOc1cccc2c1CCCC2CCCN1CCN(CC1)C1CCCCC1)C	8.27
CHEMBL1822600	CN(c1cccc2c1cccc2S(=O)(=O)NCCOCCOc1cccc2c1CCCC2CCCN1CCN(CC1)C1CCCCC1)C	7.7
CHEMBL394352	CN1CC2CCC(C1CN2Cc1ccccc1)OCc1ccccc1	7.79
CHEMBL3621983	CN1CCC(C1C)(O)c1ccc2c(c1)cccc2	7.28333
CHEMBL4514672	CN1CCC2(CC1)N=C(C)C(=O)N(C2=O)c1c(C)cccc1C	8.07
CHEMBL3806008	CN1CCCN(CC1)CCCOc1ccc(=O)n(n1)c1ccccc1	7.52
CHEMBL3358647	CN1CCN(CC1)CCCOc1cc(C)nc(n1)c1ccccc1	7.64
CHEMBL3235449	CN1CCN(CC1)CCCOc1ccc2c(c1)N(Cc1ccccc1)C(=O)CC2	8.37
CHEMBL3785368	CN1CCN(CC1)CCCOc1nc(nc2c1CCC2)c1ccccc1	7.5
CHEMBL73824	CN1CCN(CC1)CCc1ccc(c(c1)Cl)Cl	7.85
CHEMBL4091526	CN1CCN(CC1)c1ccc2c(c1)C1CCN(C2C1)C(=O)OCc1ccccc1	7.2
CHEMBL4096670	CN1CCN(CC1)c1ccc2c(c1)C1CCN(C2C1)S(=O)(=O)c1cc(Cl)cc(c1)Cl	8.47
CHEMBL3961701	CNCCN1CCC(CC1)OCc1ccccc1	7.19
CHEMBL4075591	COC(=O)C1(CC1CN1CCC(CC1)(O)c1ccc(cc1)Cl)c1ccccc1	8.05857
CHEMBL1215857	COC(=O)C1(CC1CN1CCC(CC1)(O)c1ccccc1)c1ccc(cc1)C	8.5425
CHEMBL385795	COC(=O)C1(CC1CN1CCC(CC1)(O)c1ccccc1)c1ccc(cc1)OC	8.51
CHEMBL222235	COC(=O)C1(CC1CN1CCC(CC1)(O)c1ccccc1)c1ccc(cc1)[N+](=O)[O-]	8.72
CHEMBL374686	COC(=O)C1(CC1CN1CCC(CC1)Cc1ccccc1)c1ccc(cc1)C	9.01
CHEMBL225516	COC(=O)C1(CC1CN1CCC(CC1)Cc1ccccc1)c1ccc(cc1)Cl	9.09
CHEMBL426724	COC(=O)C1(CC1CN1CCC(CC1)Cc1ccccc1)c1ccc(cc1)OC	9
CHEMBL375499	COC(=O)C1(CC1CN1CCC(CC1)Cc1ccccc1)c1ccc(cc1)[N+](=O)[O-]	9.17
CHEMBL4740355	COC(=O)C1(CC1CNC12CC3CC(C2)CC(C1)C3)c1ccccc1	7.585
CHEMBL2064197	COC(=O)C1Cc2sccc2C2(O1)CCN(CC2)Cc1ccccc1	7.54
CHEMBL3827149	COC(=O)CC1Cc2ccccc2C2(O1)CCN(CC2)CCCc1ccccc1	7.41
CHEMBL3828752	COC(=O)CC1OC(CCN2CCC(CC2)c2ccccc2)c2c(C1)cccc2	7.42333
CHEMBL2064188	COC(=O)CC1OC2(CCN(CC2)Cc2ccccc2)c2c(C1)scc2	7.92
CHEMBL4101057	COC(=O)CCN1CCN(CC1)c1ccc2c(c1)C1CCN(C2C1)C(=O)OCc1ccccc1	7.16
CHEMBL1169778	COC(c1sc2c(c1)C1(CCN(CC1)Cc1ccccc1)OC(C2)OC)OC	8.57333
CHEMBL244652	COC1CCC2N(CC1N(CCc1ccccc1)C2)Cc1ccccc1	7.12
CHEMBL393735	COC1CCC2N(CC1N(Cc1ccc(cc1)OC)C2)Cc1ccccc1	7.254
CHEMBL2170653	COC1Cc2c(csc2C2(O1)CCN(CC2)Cc1ccccc1)c1ccc(cc1)OC	8.15
CHEMBL2170496	COC1Cc2c(scc2C2(O1)CCN(CC2)Cc1ccccc1)c1ccc(cc1)C#N	9.6
CHEMBL2170501	COC1Cc2c(scc2C2(O1)CCN(CC2)Cc1ccccc1)c1ccc(cc1)C(=O)C	8.8
CHEMBL2170664	COC1Cc2c(scc2C2(O1)CCN(CC2)Cc1ccccc1)c1ccc(cc1)C(F)(F)F	8.24
CHEMBL2170500	COC1Cc2c(scc2C2(O1)CCN(CC2)Cc1ccccc1)c1ccc(cc1)OC	8.66
CHEMBL2170663	COC1Cc2c(scc2C2(O1)CCN(CC2)Cc1ccccc1)c1ccc(cc1)[N+](=O)[O-]	9
CHEMBL2170665	COC1Cc2c(scc2C2(O1)CCN(CC2)Cc1ccccc1)c1cccc2c1cccc2	8.3
CHEMBL2170670	COC1Cc2c(scc2C2(O1)CCN(CC2)Cc1ccccc1)c1ccccc1	9
CHEMBL2170497	COC1Cc2c(scc2C2(O1)CCN(CC2)Cc1ccccc1)c1cccnc1	8.66
CHEMBL2170681	COC1Cc2cc(sc2C2(O1)CCN(CC2)Cc1ccccc1)c1ccc(cc1)C#N	7.7
CHEMBL2170680	COC1Cc2cc(sc2C2(O1)CCN(CC2)Cc1ccccc1)c1ccc(cc1)C(=O)C	7.23
CHEMBL2170682	COC1Cc2cc(sc2C2(O1)CCN(CC2)Cc1ccccc1)c1ccc(cc1)C(F)(F)F	7.37
CHEMBL2170677	COC1Cc2cc(sc2C2(O1)CCN(CC2)Cc1ccccc1)c1ccc(cc1)OC	7.25
CHEMBL2170679	COC1Cc2cc(sc2C2(O1)CCN(CC2)Cc1ccccc1)c1ccc(cc1)[N+](=O)[O-]	7.8
CHEMBL2170683	COC1Cc2cc(sc2C2(O1)CCN(CC2)Cc1ccccc1)c1cccc2c1cccc2	7.92
CHEMBL2170685	COC1Cc2cc(sc2C2(O1)CCN(CC2)Cc1ccccc1)c1cccnc1	8.6
CHEMBL4576927	COC1Cc2ccccc2C2(O1)CCC(CC2)N(CC1CCCCC1)C	8.615
CHEMBL1780000	COC1Cc2ccccc2C2(O1)CCC(CC2)N(Cc1ccccc1)C	7.495
CHEMBL4171436	COC1Cc2ccccc2C2(O1)CCC(CC2)N1CCN(CC1)C1CCCCC1	8.28
CHEMBL4582223	COC1Cc2ccccc2C2(O1)CCC(CC2)NCC1CCCCC1	7.98
CHEMBL2035276	COC1Cc2ccccc2C2(O1)CCN(C2)CCCCc1ccccc1	7.28
CHEMBL2035274	COC1Cc2ccccc2C2(O1)CCN(C2)Cc1ccccc1	7.14
CHEMBL141743	COC1Cc2ccccc2C2(O1)CCN(CC2)CCc1ccccc1	8.68
CHEMBL3309265	COC1Cc2ccncc2C2(O1)CCN(CC2)CC1CCCCC1	7.96
CHEMBL3309610	COC1Cc2ccncc2C2(O1)CCN(CC2)CCC(C)C	7.64
CHEMBL3309611	COC1Cc2ccncc2C2(O1)CCN(CC2)CCCc1ccccc1	7.36
CHEMBL3309608	COC1Cc2ccncc2C2(O1)CCN(CC2)Cc1ccccc1	7.36
CHEMBL2170656	COC1Cc2ccsc2C2(O1)CCN(CC2)Cc1ccccc1	8.72
CHEMBL2170669	COC1Cc2cscc2C2(O1)CCN(CC2)Cc1ccccc1	9.66
CHEMBL1829664	COC1Cc2n(C)ncc2C2(O1)CCN(CC2)CCC(C)C	7.74
CHEMBL1829662	COC1Cc2n(C)ncc2C2(O1)CCN(CC2)CCCc1ccccc1	7.03
CHEMBL1829661	COC1Cc2n(C)ncc2C2(O1)CCN(CC2)Cc1ccc(cc1)F	7.68
CHEMBL1171554	COC1Cc2n(ncc2C2(O1)CCN(CC2)C(C)C)c1ccccc1	7.57667
CHEMBL1170769	COC1Cc2n(ncc2C2(O1)CCN(CC2)CC(C)C)c1ccccc1	7.96
CHEMBL1829573	COC1Cc2n(ncc2C2(O1)CCN(CC2)CCCCc1ccccc1)c1ccccc1	8.49
CHEMBL1829569	COC1Cc2n(ncc2C2(O1)CCN(CC2)Cc1ccc(cc1)OC)c1ccccc1	8.82
CHEMBL1829570	COC1Cc2n(ncc2C2(O1)CCN(CC2)Cc1ccco1)c1ccccc1	8.66
CHEMBL1171781	COC1Cc2sc(cc2C2(O1)CCN(CC2)Cc1ccccc1)C#N	8.78333
CHEMBL1170544	COC1Cc2sc(cc2C2(O1)CCN(CC2)Cc1ccccc1)C(=O)OC	7.89667
CHEMBL1171232	COC1Cc2sc(cc2C2(O1)CCN(CC2)Cc1ccccc1)C(=O)c1ccccc1	8.44667
CHEMBL1169779	COC1Cc2sc(cc2C2(O1)CCN(CC2)Cc1ccccc1)C(c1ccccc1)O	8.30333
CHEMBL2064181	COC1Cc2sc(cc2C2(O1)CCN(CC2)Cc1ccccc1)CN(C)C	8.16667
CHEMBL1170965	COC1Cc2sc(cc2C2(O1)CCN(CC2)Cc1ccccc1)CO	8.08333
CHEMBL2064184	COC1Cc2sc(cc2C2(O1)CCN(CC2)Cc1ccccc1)Cl	8.89
CHEMBL2170673	COC1Cc2sc(cc2C2(O1)CCN(CC2)Cc1ccccc1)c1ccc(cc1)C#N	7.05
CHEMBL2170671	COC1Cc2sc(cc2C2(O1)CCN(CC2)Cc1ccccc1)c1ccccc1	8.26
CHEMBL1170547	COC1Cc2sc(cc2C2(O1)CCN(CC2)Cc1ccco1)c1ccccc1	8.4
CHEMBL495309	COC1Cc2sccc2C2(O1)CCN(CC2)CC1CCCCC1	9.53
CHEMBL1170968	COC1Cc2sccc2C2(O1)CCN(CC2)CC=C(C)C	9
CHEMBL502487	COC1Cc2sccc2C2(O1)CCN(CC2)CCC(C)C	9
CHEMBL1169952	COC1Cc2sccc2C2(O1)CCN(CC2)CCCCc1ccccc1	8.11
CHEMBL1169951	COC1Cc2sccc2C2(O1)CCN(CC2)CCc1ccccc1	8.22667
CHEMBL492446	COC1Cc2sccc2C2(O1)CCN(CC2)Cc1ccc(cc1)F	9.21
CHEMBL492249	COC1Cc2sccc2C2(O1)CCN(CC2)Cc1ccc(cc1)OC	8.66
CHEMBL521657	COC1Cc2sccc2C2(O1)CCN(CC2)Cc1ccccc1	9.49
CHEMBL494868	COC1Cc2sccc2C2(O1)CCN(CC2)Cc1cccs1	8.7
CHEMBL1829574	COC1OC2(CCN(CC2)CC2CCCCC2)c2c(C1)n(nc2)c1ccccc1	9.26
CHEMBL1829581	COC1OC2(CCN(CC2)CCC(=C)C)c2c(C1)n(nc2)c1ccccc1	8.8
CHEMBL1829580	COC1OC2(CCN(CC2)CCC(C)C)c2c(C1)n(nc2)c1ccccc1	9.01
CHEMBL4463331	COC1OC2(c3c1cccc3)CCC(CC2)N(CC1CCCCC1)C	8.095
CHEMBL4441861	COC1OC2(c3c1cccc3)CCC(CC2)NCC1CCCCC1	7.71
CHEMBL2035279	COC1OC2(c3c1cccc3)CCN(C2)CCCCc1ccccc1	7.68
CHEMBL2035283	COC1OC2(c3c1cccc3)CCN(C2)Cc1ccccc1	7.6
CHEMBL511587	COC1OC2(c3c1cccc3)CCN(CC2)Cc1ccc(cc1)F	9.1
CHEMBL410832	COC1OC2(c3c1n(nc3)c1ccccc1)CCN(CC2)Cc1ccccc1	9.14333
CHEMBL5187189	COCC(=O)N(C1CCN(CC1)CCc1ccccc1)Cc1ccc(cc1)F	7.28
CHEMBL3918389	COCCN1CCC2C3C1CCCC3C(C(=O)C2)CC	7.59
CHEMBL3904569	COCCN1CCC2C3C1CCCC3C(C(=O)C2)Cc1ccccc1	8.7
CHEMBL1830687	COc1c(OC)cc(cc1C(=O)NCCCN1CCN(CC1)C1CCCCC1)Br	7.59
CHEMBL246662	COc1cc(Br)cc(c1OC)C(=O)NCCCCN1CCc2c(C1)cc1c(c2)OCO1	7.09
CHEMBL3359513	COc1cc(CCN2CCN(CC2)CCCc2ccccc2)ccc1O	8.76
CHEMBL3360023	COc1cc(CCN2CCN(CC2)CCCc2ccccc2)ccc1OCc1ccccc1	7.68
CHEMBL3359214	COc1cc(OCCCN2CCCCC2)nc(n1)c1ccccc1	7.71
CHEMBL4102036	COc1cc2CCN(Cc2cc1OC)CCCCCNc1ccc(c(c1)C(F)(F)F)[N+](=O)[O-]	7.4
CHEMBL2435438	COc1cc2OC(C)(C)C=Cc2cc1C(N(CCCc1ccccc1)C)C	9.02
CHEMBL3298973	COc1cc2OC(C)(C)C=Cc2cc1C(N(Cc1ccccc1)C)C	8.45
CHEMBL2435437	COc1cc2OC(C)(C)C=Cc2cc1C(N1CCCC1)C	7.72
CHEMBL2435431	COc1cc2OC(C)(C)C=Cc2cc1C(NC/C=C/c1ccccc1)C	7.08
CHEMBL2435435	COc1cc2OC(C)(C)C=Cc2cc1C(NCC1CCCCC1)C	8.62
CHEMBL2435427	COc1cc2OC(C)(C)C=Cc2cc1C(NCCCCc1ccccc1)C	7.43
CHEMBL2435424	COc1cc2OC(C)(C)C=Cc2cc1C(NCc1ccccc1)C	7.04667
CHEMBL2435440	COc1cc2OC(C)(C)CCc2cc1C(NCCc1ccccc1)C	7.26
CHEMBL4293801	COc1cc2[nH]c(cc(=O)c2cc1OC)C(=O)NCCC1CCN(CC1)Cc1ccccc1	7.44
CHEMBL502	COc1cc2c(cc1OC)CC(C2=O)CC1CCN(CC1)Cc1ccccc1	7.84
CHEMBL4287970	COc1cc2oc(cc(=O)c2cc1OC)C(=O)NCCC1CCN(CC1)Cc1ccccc1	7.43
CHEMBL4176254	COc1ccc(c(c1)C)C(=O)CCN1CCc2c(C1)cc(c(c2)OC)OC	7.88
CHEMBL4174096	COc1ccc(c(c1)OC)C(=O)CCCCN1CCc2c(C1)cc(c(c2)OC)OC	7.48
CHEMBL1917702	COc1ccc(cc1)/C(=C/CN(Cc1ccccc1)C)/C	8.28
CHEMBL1917712	COc1ccc(cc1)/C(=C/CN1CCC(CC1)Cc1ccccc1)/C	8.38
CHEMBL1917707	COc1ccc(cc1)/C(=C/CN1CCCCC1)/C	7.85
CHEMBL1822390	COc1ccc(cc1)C(=O)C1CCN(CC1)C1CCN(CC1O)Cc1ccc(cc1)F	8.6
CHEMBL1822392	COc1ccc(cc1)C(=O)C1CCN(CC1)C1CCN(CC1O)Cc1ccccc1	8.39
CHEMBL1822393	COc1ccc(cc1)C(=O)C1CCN(CC1)C1CCN(CC1O)Cc1cccnc1	7.22
CHEMBL4294724	COc1ccc(cc1)C(=O)CCCN1CCC(CC1)Cc1ccccc1	7.51
CHEMBL3337635	COc1ccc(cc1)C(=O)CCN1CCCCC1	8.1
CHEMBL4286461	COc1ccc(cc1)C(=O)CN1CCC(CC1)Cc1ccccc1	7.57
CHEMBL3805466	COc1ccc(cc1)C(=O)N1CC(=O)N(C(=O)C21CCN(CC2)Cc1ccccc1)C1CCCCC1	8.23
CHEMBL3942914	COc1ccc(cc1)C(CCN1CCC(CC1)Cc1ccccc1)C	8.46
CHEMBL3890681	COc1ccc(cc1)C(CCN1CCCCC1)C	7.7
CHEMBL3980555	COc1ccc(cc1)C(CCN1CCOCC1)C	7.12
CHEMBL4754707	COc1ccc(cc1)C1(F)CC1N	7.38
CHEMBL4635589	COc1ccc(cc1)CC(CN1CCN(CC1)CCSC(c1ccc(cc1)F)c1ccc(cc1)F)O	8.02
CHEMBL4648300	COc1ccc(cc1)CC(CN1CCN(CC1)CC[S+](C(c1ccc(cc1)F)c1ccc(cc1)F)[O-])O	7.5
CHEMBL3926713	COc1ccc(cc1)CC1C(=O)CC2C3C1CCCC3N(CC2)C	8.3
CHEMBL3889749	COc1ccc(cc1)CC1C(=O)CC2C3C1CCCC3N(CC2)CC1CCCCC1	8
CHEMBL3917750	COc1ccc(cc1)CC1C(=O)CC2C3C1CCCC3N(CC2)CCC(C)C	8.52
CHEMBL3355366	COc1ccc(cc1)CCN(CCCCc1cn(c2c1cccc2)c1ccc(cc1)F)C	7.17
CHEMBL5204518	COc1ccc(cc1)CN(C(=O)c1ccco1)C1CCN(CC1)CCc1ccccc1	7.16
CHEMBL1824788	COc1ccc(cc1)CN1C2CC3CC1CC(C2)C3	7.91
CHEMBL472049	COc1ccc(cc1)CN1CC2CCC(=O)C1CN2CC=C(C)C	7.735
CHEMBL471013	COc1ccc(cc1)CN1CC2CCC(=O)C1CN2Cc1ccccc1	7.08
CHEMBL238176	COc1ccc(cc1)CN1CC2CCC(C1CN2Cc1ccccc1)O	7.666
CHEMBL1822402	COc1ccc(cc1)CN1CCC(C(C1)N1CCC(CC1)C(=O)c1ccc(cc1)F)O	7.04
CHEMBL4743074	COc1ccc(cc1)CN1CCC(CC1)OC(=O)CCCCC1SSCC1	8.51
CHEMBL302197	COc1ccc(cc1)CN1CCC2(CC1)CCCc1c2cccc1	8.42
CHEMBL4081826	COc1ccc(cc1)CN1CCCN(C(C1)C(C)C)Cc1ccccc1	7.7
CHEMBL4083666	COc1ccc(cc1)CN1CCCN(C(C1)Cc1ccccc1)Cc1ccccc1	7.46
CHEMBL4100774	COc1ccc(cc1)CN1CCCN(CC1C)CC1CCCCC1	8.96
CHEMBL2069962	COc1ccc(cc1)CN1CCN(C1)Cc1cc2c(o1)cccc2	7.37
CHEMBL4739870	COc1ccc(cc1)CN1CCN(CC1)C(=O)CCCCC1SSCC1	8.24
CHEMBL272650	COc1ccc(cc1)CN1CCN(CC1)CCCc1ccccc1	9.12
CHEMBL4243361	COc1ccc(cc1)CN1CC[Si]2(CC1)CCCc1c2cccc1	8.57
CHEMBL5083713	COc1ccc(cc1)OCC(N1CCC(CC1)C)C	8.885
CHEMBL5089619	COc1ccc(cc1)OCCCN1C(C)CCCC1C	7.63
CHEMBL5093782	COc1ccc(cc1)OCCN1CCC(CC1)C	9.05
CHEMBL5090648	COc1ccc(cc1)OCCN1CCCCC1C	7.4
CHEMBL2349460	COc1ccc(cc1)c1csc2c1CC(=O)OC12CCN(CC1)Cc1ccccc1	7.37
CHEMBL3359235	COc1ccc(cc1)c1nc(OCCCN2CCCCC2)c(c(n1)C)Cl	8.41
CHEMBL2349455	COc1ccc(cc1)c1scc2c1CC(=O)OC12CCN(CC1)Cc1ccccc1	7.96
CHEMBL2170659	COc1ccc(cc1)c1scc2c1CCOC12CCN(CC1)Cc1ccccc1	8.82
CHEMBL1830685	COc1ccc(cc1C(=O)NCCCN1CCN(CC1)C1CCCCC1)C	7.34
CHEMBL4225958	COc1ccc(cc1NC(=O)OC1CC23C(C1)(CCCC2)CCN(C3)Cc1ccccc1)C	7.09
CHEMBL481425	COc1ccc(cc1NC(=O)OC1CC2CCCC(C1)N2Cc1ccccc1)C	7.03
CHEMBL52440	COc1ccc2c(c1)C13CCCCC3C(C2)N(CC1)C	7.6
CHEMBL3357784	COc1ccc2c(c1)CCC(CC2)NCCCc1ccccc1	7.57
CHEMBL2349072	COc1ccc2c(c1)CCCC2CCCCN1C(C)CCCC1C	8.06
CHEMBL540573	COc1ccc2c(c1)CCCC2CCCCN1CCC(CC1)C	9.19
CHEMBL1189823	COc1ccc2c(c1)CCCC2CCCCN1CCCCC1(C)C	8.21
CHEMBL538566	COc1ccc2c(c1)CCCC2CCCN1CCC(CC1)(C)C	8.93
CHEMBL534695	COc1ccc2c(c1)CCCC2CCCN1CCC(CC1)C	8.75
CHEMBL4457961	COc1ccc2c(c1)CCN(CC2)CCC(Cc1ccccc1)F	8.18
CHEMBL4565798	COc1ccc2c(c1)CCN(CC2)CCCCc1ccccc1	7.96
CHEMBL4282527	COc1ccc2c(c1)[nH]c(cc2=O)C(=O)NCCC1CCN(CC1)Cc1ccccc1	7.34
CHEMBL3099037	COc1ccc2c(c1)c(c[nH]2)C(=O)CN1CCC(CC1)(O)c1ccc(cc1)Br	7.22
CHEMBL3099036	COc1ccc2c(c1)c(c[nH]2)C(=O)CN1CCC(CC1)(O)c1ccc(cc1)Cl	7.11
CHEMBL224021	COc1ccc2c(c1)ccc(c2)/C(=C/CN(C)C)/C	7.67
CHEMBL4286416	COc1ccc2c(c1)ccc(c2)C(=O)CCCN1CCC(CC1)Cc1ccccc1	7.17
CHEMBL597631	COc1ccc2c(c1)ccc(c2)C(CCN(C)C)(O)C	7.42667
CHEMBL223337	COc1ccc2c(c1)ccc(c2)C(CCN(C)C)C	8.64
CHEMBL2349066	COc1ccc2c(c1)cccc2CCCCN1C(C)(C)CCCC1(C)C	7.05
CHEMBL2349068	COc1ccc2c(c1)cccc2CCCCN1C(C)CCCC1C	7.73
CHEMBL4749734	COc1ccc2c(c1)cccc2CCCCN1C2CCCC1CCC2	8.99
CHEMBL535366	COc1ccc2c(c1)cccc2CCCCN1CCCCC1	8.94
CHEMBL554450	COc1ccc2c(c1)cccc2CCCCN1CCCCC1(C)C	7.65
CHEMBL536483	COc1ccc2c(c1)cccc2CCCN1CCC(CC1)(C)C	8.83
CHEMBL559178	COc1ccc2c(c1)cccc2CCCN1CCC(CC1)C	8.82
CHEMBL537177	COc1ccc2c(c1)cccc2CCCN1CCCC(C1)(C)C	9.46
CHEMBL552542	COc1ccc2c(c1)cccc2CCCN1CCCC(C1)C	8.675
CHEMBL542701	COc1ccc2c(c1)cccc2CCCN1CCCCC1C	8.445
CHEMBL535857	COc1ccc2c(c1)cccc2CCCN1CCN(CC1)C1CCCCC1	8.5
CHEMBL1917703	COc1cccc(c1)/C(=C/CN(Cc1ccccc1)C)/C	8
CHEMBL1917713	COc1cccc(c1)/C(=C/CN1CCC(CC1)Cc1ccccc1)/C	8.11
CHEMBL1917708	COc1cccc(c1)/C(=C/CN1CCCCC1)/C	7.04
CHEMBL4280664	COc1cccc(c1)C(=O)CCCN1CCC(CC1)Cc1ccccc1	7.77
CHEMBL3960377	COc1cccc(c1)C(CCN1CCC(CC1)Cc1ccccc1)C	8.54
CHEMBL3891322	COc1cccc(c1)C(CCN1CCCCC1)C	7.44
CHEMBL521350	COc1cccc(c1)C1CCC(CC1)N1CCN(CC1)c1ccccn1	7.18
CHEMBL487359	COc1cccc(c1)C1CCC(CC1)NCCOc1ccccn1	8.11
CHEMBL3355365	COc1cccc(c1)CCN(CCCCc1cn(c2c1cccc2)c1ccc(cc1)F)C	7.76
CHEMBL358116	COc1cccc(c1)CCN1CCN(CC1)CCCc1ccccc1	8.85
CHEMBL408821	COc1cccc(c1)CN1CCN(CC1)CCCc1ccccc1	9.06
CHEMBL4167368	COc1cccc(c1)c1ccc2c(c1)C1CCN(C2C1)Cc1ccccc1	7.95
CHEMBL4170703	COc1cccc(c1)c1ccc2c(c1)CCCN(C2)Cc1ccccc1	7.68
CHEMBL4167315	COc1cccc(c1)c1ccc2c(c1)CN(C2)Cc1ccccc1	8.39
CHEMBL1830691	COc1cccc2c1CCCC2C(=O)NCCCN1CCN(CC1)C1CCCCC1	7.45
CHEMBL573234	COc1cccc2c1CCCC2CCC(=O)N1CCN(CC1)C1CCCCC1	9.96
CHEMBL573932	COc1cccc2c1CCCC2CCCC1CCN(CC1)C1CCCCC1	8.96
CHEMBL128358	COc1cccc2c1CCCC2CCCCN1CCCC(C1)(C)C	8.67
CHEMBL573695	COc1cccc2c1CCCC2CCCN1CCC(CC1)(O)C1CCCCC1	8.25
CHEMBL134607	COc1cccc2c1CCCC2CCCN1CCCCC1	8.47
CHEMBL53325	COc1cccc2c1CCCC2CCCN1CCN(CC1)C1CCCCC1	9.135
CHEMBL583945	COc1cccc2c1CCCC2CCCN1CCOCC1	8.04
CHEMBL582875	COc1cccc2c1CCCC2CCC[N+]1(C)CCN(CC1)C1CCCCC1	7.2
CHEMBL1672036	COc1cccc2c1CCCC2N(CCN1CCN(CC1)C1CCCCC1)C	8.38
CHEMBL1672032	COc1cccc2c1CCCC2NC(=O)CN1CCN(CC1)C1CCCCC1	7.464
CHEMBL576193	COc1cccc2c1CCCC2NCCN1CCC(CC1)C1CCCCC1	9.17
CHEMBL574155	COc1cccc2c1CCCC2OCCN1CCC(CC1)C1CCCCC1	7.04
CHEMBL1672038	COc1cccc2c1CCCC2OCCN1CCN(CC1)C1CCCCC1	8.52
CHEMBL1672040	COc1cccc2c1OCCC2CCCN1CCN(CC1)C1CCCCC1	7.9
CHEMBL535410	COc1cccc2c1cccc2CCCN1CCCC(C1)(C)C	7.35
CHEMBL535856	COc1cccc2c1cccc2CCCN1CCN(CC1)C1CCCCC1	8.8
CHEMBL1672041	COc1cccc2c1cccc2NC(=O)CN1CCN(CC1)C1CCCCC1	7.37
CHEMBL1672042	COc1cccc2c1cccc2NCCN1CCN(CC1)C1CCCCC1	8.26
CHEMBL485729	COc1ccccc1C1CCC(CC1)N1CCN(CC1)c1ccccn1	7.485
CHEMBL147779	COc1ccccc1CCN1CCN(CC1)CCCc1ccccc1	8.41
CHEMBL1172209	CSc1ccc(cc1)C1(O)CCN(CC1)Cc1c[nH]c2c1cccn2	8.09
CHEMBL3805850	Cc1c(OCCCN2CCCCC2)nn(c(=O)c1C)c1ccc(c(c1)Cl)Cl	7.18
CHEMBL3358635	Cc1cc(OCCCCN2CCOCC2)nc(n1)c1ccccc1	7.02
CHEMBL3358652	Cc1cc(OCCCN2CCCC2)nc(n1)c1ccccc1	7.87
CHEMBL2170062	Cc1cc(nn1c1ccc2c(c1)cccc2)OCCN1CCOCC1	8.1675
CHEMBL4643805	Cc1ccc(c(c1)C)CN1CCCN(CC1)C(=O)c1cc2c(o1)cccc2	7.7
CHEMBL4640137	Cc1ccc(c(c1)C)CN1CCCN(CC1)C(=O)c1ccc2c(n1)cccc2	7.54
CHEMBL4644807	Cc1ccc(c(c1)C)CN1CCCN(CC1)C(=O)c1cccc2c1cccc2	7.15
CHEMBL3805219	Cc1ccc(cc1)C(=O)N1CC(=O)N(C(=O)C21CCN(CC2)Cc1ccccc1)C1CCCCC1	7.95
CHEMBL4640727	Cc1ccc(cc1)C(=O)NCCCCN1CCC(CC1)Cc1ccccc1	7.21
CHEMBL5176125	Cc1ccc(cc1)CN(C(=O)c1ccco1)C1CCN(CC1)CCc1ccccc1	7.33
CHEMBL3235454	Cc1ccc(cc1)CN1C(=O)CCc2c1cc(OCCCN1CCCCC1)cc2	8.77
CHEMBL269870	Cc1ccc(cc1)CN1CCN(CC1)CCCc1ccccc1	8.93
CHEMBL582996	Cc1ccc(cc1)S(=O)(=O)OCCCC1OC2(c3c1cccc3)CCN(CC2)Cc1ccccc1	8.09
CHEMBL3781294	Cc1ccc(cc1)c1cnc(s1)C1(O)CCN(CC1)Cc1ccccc1	8.15
CHEMBL3780671	Cc1ccc(cc1)c1csc(n1)C1(O)CCN(CC1)Cc1ccccc1	8.42
CHEMBL2170498	Cc1ccc(cc1)c1scc2c1CCOC12CCN(CC1)Cc1ccccc1	8.44
CHEMBL3805783	Cc1ccc(cc1)n1nc(OCCCN2CCCCC2)ccc1=O	7.16
CHEMBL2391066	Cc1cccc(c1)CN1CCN(CC1)S(=O)(=O)Cc1ccccc1	7.82
CHEMBL2391072	Cc1cccc(c1)CS(=O)(=O)N1CCC(CC1)Cc1ccccc1	8.33
CHEMBL511680	Cc1cccc(c1C1CCC(CC1)N1CCN(CC1)c1ccccn1)C	8.2
CHEMBL4211291	Cc1cn(c2c1cccc2)CN1CCN(CC1)CCc1ccccc1	7.85
CHEMBL3359243	Cc1nc(OCCCN2CCCCC2)c(c(n1)C)Cl	7.23
CHEMBL3359218	Cc1nc(nc(c1C)OCCCN1CCCCC1)c1ccccc1	8.02
CHEMBL3359230	Cc1nc(nc(c1Cl)OCCCN1CCCC1)c1ccccc1	8.4
CHEMBL3359244	Cc1nc(nc(c1Cl)OCCCN1CCCCC1)C1CC1	7.4
CHEMBL3359238	Cc1nc(nc(c1Cl)OCCCN1CCCCC1)c1ccc(c(c1)F)F	9.01
CHEMBL3359236	Cc1nc(nc(c1Cl)OCCCN1CCCCC1)c1ccc(cc1)C(F)(F)F	8.35
CHEMBL3359229	Cc1nc(nc(c1F)OCCCN1CCCC1)c1ccccc1	8.45
CHEMBL1645209	ClCCC1OC2(c3c1cccc3)CCN(CC2)CC1CCCCC1	8.66
CHEMBL1645204	ClCCC1OC2(c3c1cccc3)CCN(CC2)Cc1ccccc1	8.8
CHEMBL3804905	Clc1c(Cl)cccc1n1nc(OCCCN2CCCCC2)ccc1=O	7.32
CHEMBL343654	Clc1cc(CCN2CCN(CC2)CCCc2ccccc2)ccc1Cl	8.66
CHEMBL3805113	Clc1cc(cc(c1)Cl)n1nc(OCCCN2CCCCC2)ccc1=O	7.52
CHEMBL3397626	Clc1ccc(c(c1)Cl)CN1CCC(CC1)C(=O)N1CCc2c(C1)cccc2	7.21
CHEMBL4792161	Clc1ccc(c(c1)Cl)c1noc(n1)CCCCN1CCOCC1	9.55
CHEMBL3805473	Clc1ccc(c(c1)Cl)n1nc(OCCCN2CCCCC2)ccc1=O	7.6
CHEMBL5194969	Clc1ccc(cc1)/C=C/1\CC2CCC(C1)N2CC(c1ccccc1)O	8.27
CHEMBL5192985	Clc1ccc(cc1)C1(O)CCN(CC1)CCCCOC(=O)c1ccc(cc1)C(=S)N	7.24
CHEMBL445102	Clc1ccc(cc1)C1(O)CCN(CC1)Cc1c[nH]c2c1cccc2	7.71
CHEMBL5192862	Clc1ccc(cc1)CN(C(=O)c1ccco1)C1CCN(CC1)CCc1ccccc1	7.46
CHEMBL3397622	Clc1ccc(cc1)CN1CCC(CC1)C(=O)N1CCCc2c1cccc2	8.43
CHEMBL3397625	Clc1ccc(cc1)CN1CCC(CC1)C(=O)N1CCc2c(C1)cccc2	8.1
CHEMBL4074010	Clc1ccc(cc1)CN1CCCN(CC1C)CC1CCCCC1	8.31
CHEMBL5094446	Clc1ccc(cc1)OCCN1CCCCC1C	7.735
CHEMBL3359239	Clc1ccc(cc1)c1nc(OCCCN2CCCCC2)c(c(n1)C)Cl	8.97
CHEMBL3805081	Clc1ccc(cc1)n1nc(OCCCN2CCCCC2)ccc1=O	8.01
CHEMBL3805396	Clc1ccc(cc1Cl)n1nc(OCCCN2CCCCC2)ccc1=O	8.85
CHEMBL4441396	Clc1ccc2c(c1)n(CCCCN1CCCCCC1)c(=O)s2	9.11
CHEMBL4553933	Clc1ccc2c(c1)n(CCN1CCCCCC1)c(=O)o2	7
CHEMBL4521420	Clc1ccc2c(c1)nc(o2)SCCN1CCCCCC1	8.71
CHEMBL4455014	Clc1ccc2c(c1)nc(s2)SCCCCN1CCCCCC1	8.07
CHEMBL2391064	Clc1cccc(c1)CN1CCN(CC1)S(=O)(=O)Cc1ccccc1	7.29
CHEMBL2391069	Clc1cccc(c1)CS(=O)(=O)N1CCC(CC1)Cc1ccccc1	7.4
CHEMBL4790607	Cn1nc(nc1c1ccc(cc1)C(C)(C)C)CN1CCC(CC1)Cc1ccccc1	8.7
CHEMBL4777990	Cn1nc(nc1c1ccc(cc1)C(C)(C)C)CN1CCCCC1	8.43
CHEMBL4793144	Cn1nc(nc1c1ccc(cc1)C(C)(C)C)CN1CCN(CC1)CCc1ccccc1	8
CHEMBL4784828	Cn1nc(nc1c1ccc(cc1)C(C)(C)C)CN1CCN(CC1)c1ccccc1	7.85
CHEMBL4787318	Cn1nc(nc1c1ccc(cc1)C(C)(C)C)CN1CCOCC1	7.25
CHEMBL1829668	Cn1ncc2c1C=COC12CCN(CC1)Cc1ccccc1	7.92
CHEMBL1170545	Cn1ncc2c1CCOC12CCN(CC1)CCCc1ccccc1	8.21
CHEMBL1829672	Cn1ncc2c1CCOC12CCN(CC1)Cc1ccccc1	8.04
CHEMBL1829565	Cn1ncc2c1CCOC12CCN(CC1)N1CCC(CC1)c1ccccc1	8.15
CHEMBL4288292	FC(CCc1ccccc1)CNC1CCc2c(CC1)cccc2	7.09
CHEMBL4459710	FC(CN1CCc2c(CC1)ccc(c2)O)CCc1ccccc1	7.15
CHEMBL4440895	FC(Cc1ccccc1)CCN1CCc2c(CC1)ccc(c2)O	7.79
CHEMBL4575948	FC(Cc1ccccc1)CCN1CCc2c(CC1)cccc2	8.1
CHEMBL4283845	FC(Cc1ccccc1)CNC1CCc2c(CC1)cccc2	7.27
CHEMBL3359225	FC(c1cc(OCCCN2CCCC2)nc(n1)c1ccccc1)(F)F	7.56
CHEMBL1939702	FCC1OC2(c3c1cccc3)CCN(CC2)C(c1ccccc1)C	8.44
CHEMBL1939700	FCC1OC2(c3c1cccc3)CCN(CC2)Cc1ccc(cc1)F	9.85
CHEMBL4170858	FCCC1Cc2ccccc2C2(O1)CCC(CC2)N1CCN(CC1)C1CCCCC1	7.82
CHEMBL1645210	FCCC1OC2(c3c1cccc3)CCN(CC2)C(c1ccccc1)C	9
CHEMBL1645207	FCCC1OC2(c3c1cccc3)CCN(CC2)CC1CCCCC1	9.15
CHEMBL1645216	FCCC1OC2(c3c1cccc3)CCN(CC2)CC=C(C)C	8.82
CHEMBL1645205	FCCC1OC2(c3c1cccc3)CCN(CC2)Cc1ccc(cc1)F	9.24
CHEMBL1645202	FCCC1OC2(c3c1cccc3)CCN(CC2)Cc1ccccc1	9.085
CHEMBL574124	FCCCC1OC2(c3c1cccc3)CCN(CC2)C(c1ccccc1)C	8.14
CHEMBL583002	FCCCC1OC2(c3c1cccc3)CCN(CC2)CC1CCCCC1	9.24
CHEMBL584199	FCCCC1OC2(c3c1cccc3)CCN(CC2)CC=C(C)C	8.7
CHEMBL568255	FCCCC1OC2(c3c1cccc3)CCN(CC2)Cc1ccc(cc1)F	8.72
CHEMBL1939699	FCCCCC1OC2(c3c1cccc3)CCN(CC2)Cc1ccccc1	8.92
CHEMBL2069865	FCCCOc1ccc(cc1)CN1CCCN(CC1)Cc1cc2c(o1)cccc2	9.92
CHEMBL230904	FCCN1CCN(CC1)CCNC(=O)c1ccc(cc1)I	8.22
CHEMBL1170085	FCCN1CN(C2(C1=O)CCN(CC2)Cc1coc2c1cccc2)c1ccccc1	7.55
CHEMBL3597315	FCCOc1ccc(cc1)C(=O)C1CCN(CC1)C1Cc2ccccc2CC1O	7.88
CHEMBL2069964	FCCOc1ccc(cc1)CN1CCN(C1)Cc1cc2c(o1)cccc2	8.19
CHEMBL3360016	FCCOc1ccc(cc1OC)CCN1CCN(CC1)CCCc1ccccc1	8.1
CHEMBL4466227	FCCOc1ccc2c(c1)CCN(CC2)CCC(Cc1ccccc1)F	7.6
CHEMBL3360017	FCOc1ccc(cc1OC)CCN1CCN(CC1)CCCc1ccccc1	8.19
CHEMBL5173931	Fc1ccc(c(c1)F)CN(C(=O)c1ccco1)C1CCN(CC1)CCc1ccccc1	7.28
CHEMBL1229211	Fc1ccc(c(c1)F)CNC(=O)c1cn2CC3OCCC(N3C(=O)c2c(c1=O)O)C	7.03
CHEMBL5175714	Fc1ccc(cc1)/C=C/1\CC2CCC(C1)N2CC(c1ccccc1)O	8.5925
CHEMBL54	Fc1ccc(cc1)C(=O)CCCN1CCC(CC1)(O)c1ccc(cc1)Cl	8.41
CHEMBL4758124	Fc1ccc(cc1)C(=O)N1CCC(CC1)N(CCSC(c1ccc(cc1)F)c1ccc(cc1)F)C	8.15
CHEMBL4741279	Fc1ccc(cc1)C(=O)N1CCC(CC1)NCCSC(c1ccc(cc1)F)c1ccc(cc1)F	7.49
CHEMBL4080696	Fc1ccc(cc1)C(=O)NC1CCN(CC1)Cc1ccccc1	8.22
CHEMBL1036	Fc1ccc(cc1)C(CCCN1CCC(CC1)(O)c1ccc(cc1)Cl)O	8.59125
CHEMBL5175585	Fc1ccc(cc1)C(CN1C2CCC1CC(C2)Cc1ccccc1)O	8.66
CHEMBL281594	Fc1ccc(cc1)C(c1ccc(cc1)F)OCCN1CCN(CC1)CCCc1ccccc1	7.29
CHEMBL4643859	Fc1ccc(cc1)C(c1ccc(cc1)F)SCCCN1CCN(CC1)CCCc1ccccc1	7.53
CHEMBL4750997	Fc1ccc(cc1)C(c1ccc(cc1)F)SCCN1CCC(CC1)NCc1ccc(cc1)Cl	7.2
CHEMBL4747413	Fc1ccc(cc1)C(c1ccc(cc1)F)SCCN1CCC(CC1)NCc1ccccc1	7.22
CHEMBL4640372	Fc1ccc(cc1)C(c1ccc(cc1)F)SCCN1CCC2(CC1)CCN(C2)CC(c1ccccc1)O	7.34
CHEMBL4791063	Fc1ccc(cc1)C(c1ccc(cc1)F)SCCNC1CCN(CC1)C(=O)c1ccc(cc1F)F	7.69
CHEMBL4795981	Fc1ccc(cc1)C(c1ccc(cc1)F)SCCNC1CCN(CC1)C(=O)c1ccccc1F	8.45
CHEMBL4748901	Fc1ccc(cc1)C(c1ccc(cc1)F)SCCNC1CCN(CC1)CCc1ccccc1	7.24
CHEMBL5209286	Fc1ccc(cc1)CC1CC2CCC(C1)N2CC(c1ccc(cc1)F)O	8.26
CHEMBL28564	Fc1ccc(cc1)CC1CCN(CC1)CC(c1ccc(cc1)Cl)O	7.03
CHEMBL1824790	Fc1ccc(cc1)CCN1C2CC3CC1CC(C2)C3	7.89
CHEMBL5183712	Fc1ccc(cc1)CN(C(=O)c1ccco1)C1CCN(CC1)CCc1ccccc1	7.53
CHEMBL5201601	Fc1ccc(cc1)CN(C1CCN(CC1)CCc1ccccc1)C(=O)C	7.47
CHEMBL3235455	Fc1ccc(cc1)CN1C(=O)CCc2c1cc(OCCCN1CCCCC1)cc2	8.91
CHEMBL1824786	Fc1ccc(cc1)CN1C2CC3CC1CC(C2)C3	7.92
CHEMBL1822401	Fc1ccc(cc1)CN1CCC(C(C1)N1CCC(CC1)C(=O)c1ccc(cc1)F)O	7.3
CHEMBL1822386	Fc1ccc(cc1)CN1CCC(C(C1)O)N1CCC(CC1)C(=O)c1ccc(cc1)F	9.32
CHEMBL4794406	Fc1ccc(cc1)CN1CCC(CC1)NCCSC(c1ccc(cc1)F)c1ccc(cc1)F	7.88
CHEMBL4750660	Fc1ccc(cc1)CN1CCC(CC1)NCC[S+](C(c1ccc(cc1)F)c1ccc(cc1)F)[O-]	7.58
CHEMBL4745051	Fc1ccc(cc1)CN1CCC(c2c(C1)cccc2)Cc1ccccc1	8.15
CHEMBL513470	Fc1ccc(cc1)CN1CCC2(CC1)OC(=O)c1c2cccc1	8.01333
CHEMBL1939701	Fc1ccc(cc1)CN1CCC2(CC1)OC(c1c2cccc1)C	8.96
CHEMBL466289	Fc1ccc(cc1)CN1CCC2(CC1)OCc1c2cccc1	9.74
CHEMBL4761184	Fc1ccc(cc1)CN1CCN(CC1)C(=O)CCCCC1SSCC1	8.54
CHEMBL4788854	Fc1ccc(cc1)CNC1CCN(CC1)CCSC(c1ccc(cc1)F)c1ccc(cc1)F	7.38
CHEMBL507255	Fc1ccc(cc1)N(c1ccc(cc1)F)CCCN1CCN(CC1)CC(OC(=O)Cc1ccccc1)Cc1ccccc1	7.06
CHEMBL314424	Fc1ccc(cc1)N(c1ccc(cc1)F)CCCN1CCN(CC1)CCC(c1ccccc1)O	7.35
CHEMBL4449269	Fc1ccc(cc1)N1CCN(CC1)CCCCN1C(=O)CCc2c1cccc2	7.8
CHEMBL3359237	Fc1ccc(cc1)c1nc(OCCCN2CCCCC2)c(c(n1)C)Cl	8.94
CHEMBL61479	Fc1ccc(cc1)n1cc(c2c1cccc2)CCCCN1CCC2(CC1)OCc1c2cccc1	7.84
CHEMBL3805646	Fc1ccc(cc1)n1nc(OCCCN2CCCCC2)ccc1=O	7.77
CHEMBL3806153	Fc1ccc(cc1Cl)n1nc(OCCCN2CCCCC2)ccc1=O	8
CHEMBL1824789	Fc1cccc(c1)CCN1C2CC3CC1CC(C2)C3	8.08
CHEMBL5179109	Fc1cccc(c1)CN(C(=O)C1CCCC1)C1CCN(CC1)CCc1ccccc1	7.26
CHEMBL5179132	Fc1cccc(c1)CN(C(=O)c1ccco1)C1CCN(CC1)CCc1ccccc1	7.45
CHEMBL1824785	Fc1cccc(c1)CN1C2CC3CC1CC(C2)C3	7.66
CHEMBL271396	Fc1cccc(c1)CN1CCN(CC1)CCCc1ccccc1	8.87
CHEMBL2391063	Fc1cccc(c1)CN1CCN(CC1)S(=O)(=O)Cc1ccccc1	7.16
CHEMBL3360018	I/C=C/COc1ccc(cc1OC)CCN1CCN(CC1)CCCc1ccccc1	7.77
CHEMBL50112	Ic1ccc(cc1)C(=O)NC1CCN(CC1)Cc1ccccc1	8.77
CHEMBL231120	Ic1ccc(cc1)C(=O)NCCCCNN1CC2CC1CC2	7.49
CHEMBL1173285	Ic1ccc(cc1)C1(O)CCN(CC1)Cc1c[nH]c2c1cccc2	8.7
CHEMBL1172208	Ic1ccc(cc1)C1(O)CCN(CC1)Cc1c[nH]c2c1cccn2	8.92
CHEMBL1170456	Ic1ccc(cc1)C1(O)CCN(CC1)Cc1cc2c(o1)cccc2	8.85
CHEMBL1171249	Ic1ccc(cc1)C1(O)CCN(CC1)Cc1coc2c1cccc2	9.29
CHEMBL50880	Ic1cccc(c1)CN1CCC(C(C1)N1CCC(CC1)c1ccccc1)O	7.04
CHEMBL271395	Ic1cccc(c1)CN1CCN(CC1)CCCc1ccccc1	9.41
CHEMBL2391071	Ic1cccc(c1)CS(=O)(=O)N1CCC(CC1)Cc1ccccc1	9.02
CHEMBL2391061	Ic1cccc(c1)CS(=O)(=O)N1CCN(CC1)Cc1ccccc1	8.57
CHEMBL1172291	N#CC1Cc2ccccc2C2(O1)CCN(CC2)Cc1ccccc1	8.54333
CHEMBL2064201	N#CC1Cc2sccc2C2(O1)CCN(CC2)CC1CCCCC1	9.34
CHEMBL2064202	N#CC1Cc2sccc2C2(O1)CCN(CC2)Cc1ccccc1	8.85
CHEMBL468929	N#CC1OC2(c3c1cccc3)CCN(CC2)Cc1ccc(cc1)F	9.07
CHEMBL2349456	N#Cc1ccc(cc1)c1scc2c1CC(=O)OC12CCN(CC1)Cc1ccccc1	7.96
CHEMBL2170661	N#Cc1ccc(cc1)c1scc2c1CCOC12CCN(CC1)Cc1ccccc1	8.47
CHEMBL4869117	N(CC1CCCCC1)CCC1CCCC(O1)c1ccccc1	8.82
CHEMBL4175547	N=C(Nc1cc([3H])ccc1C)Nc1cc([3H])ccc1C	7.23
CHEMBL282433	N=C(Nc1ccccc1C)Nc1ccccc1C	7.11117
CHEMBL3355379	NC(=N)N(c1ccccc1C)c1ccccc1C	7.05
CHEMBL2062543	NCC1Cc2sccc2C2(O1)CCN(CC2)Cc1ccccc1	7.01
CHEMBL4292477	Nc1ccc2c(c1)c(=O)cc(o2)C(=O)NCCC1CCN(CC1)Cc1ccccc1	8.84
CHEMBL4159461	O1CCN(CC1)c1ccc2c(c1)C1CCN(C2C1)Cc1ccccc1	7.78
CHEMBL4175187	O1CCN(CC1)c1ccc2c(c1)CCCN(C2)Cc1ccccc1	8.21
CHEMBL502790	O=C(C(C)C)OC(c1ccccc1)CCN1CCN(CC1)CCCN(c1ccc(cc1)F)c1ccc(cc1)F	7.05
CHEMBL1449159	O=C(C1(CCCCC1)c1ccccc1)OCCN1CCOCC1	7.07667
CHEMBL4742866	O=C(C1CC1)N1CCC(CC1)NCCSC(c1ccc(cc1)F)c1ccc(cc1)F	7.33
CHEMBL573704	O=C(C1CCCCC1)N1CCN(CC1)C1CCCCC1	8.44
CHEMBL559979	O=C(C1CCN(CC1)Cc1ccc(cc1)Cl)NCc1ccccc1	7.89
CHEMBL3397614	O=C(C1CCN(CC1)Cc1ccc(cc1Cl)Cl)NC1CCCCC1	7.28
CHEMBL3397615	O=C(C1CCN(CC1)Cc1ccccc1)NC1CCCCC1	7.82
CHEMBL4763854	O=C(COc1ccc(c(c1)Cl)Cl)NCCN1CCOCC1	7.38
CHEMBL4632489	O=C(Cc1cccc(c1)CO[N+](=O)[O-])NC1CCN(CC1)Cc1ccccc1	7.72
CHEMBL76895	O=C(Cc1ccccc1)NC1CCN(CC1)Cc1ccccc1	8.41
CHEMBL5187961	O=C(N(C1CCN(CC1)CCc1ccccc1)Cc1ccccc1)C1CC1	7.54
CHEMBL5208537	O=C(N(C1CCN(CC1)CCc1ccccc1)Cc1ccccc1)c1ccco1	7.13
CHEMBL5190238	O=C(N1CCC2CC1C(CC2)N1CCCC1)Cc1ccc(c(c1)Cl)Cl	8.02
CHEMBL4090715	O=C(N1CCC2CC1c1cc(ccc21)N1CCN(CC1)CC1CCCC1)OCc1ccccc1	7.64
CHEMBL4095894	O=C(N1CCC2CC1c1ccc(cc21)N1CCN(CC1)C(C)C)OCc1ccccc1	8.44
CHEMBL4071404	O=C(N1CCC2CC1c1ccc(cc21)N1CCN(CC1)C1CCCCC1)OCc1ccccc1	7.98
CHEMBL4093176	O=C(N1CCC2CC1c1ccc(cc21)N1CCN(CC1)Cc1ccccc1)OCc1ccccc1	7.85
CHEMBL4166276	O=C(N1CCCc2c(C1)cc(cc2)N1CCN(CC1)C1CCCC1)OCc1ccccc1	7.31
CHEMBL3397621	O=C(N1CCCc2c1cccc2)C1CCN(CC1)Cc1ccccc1	8.34
CHEMBL3397624	O=C(N1CCc2c(C1)cccc2)C1CCN(CC1)Cc1ccccc1	8.06
CHEMBL5203777	O=C(Nc1sc2c(n1)c(C)ccc2)CCN1CCN(CC1)C1CCCCC1	7.62
CHEMBL1649601	O=C(OC(c1ccc(cc1)F)CCCN1CCC(CC1)(O)c1ccc(cc1)Cl)CCCc1ccccc1	7.19
CHEMBL4749030	O=C(OC1CCN(CC1)Cc1ccc(cc1)F)CCCCC1SSCC1	8.39
CHEMBL4285912	O=C(c1cc(=O)c2c([nH]1)c(O)ccc2)NCCC1CCN(CC1)Cc1ccccc1	7.32
CHEMBL4280725	O=C(c1cc(=O)c2c(o1)cc(c(c2)O)O)NCCC1CCN(CC1)Cc1ccccc1	7.57
CHEMBL4277548	O=C(c1cc(=O)c2c(o1)ccc(c2)[N+](=O)[O-])NCCC1CCN(CC1)Cc1ccccc1	9.01
CHEMBL4639180	O=C(c1cc2c(o1)cccc2)N1CCCN(CC1)Cc1ccccc1	8.1
CHEMBL5205647	O=C(c1ccc(cc1)C(=S)N)NC1CCN(CC1)Cc1ccccc1	7.03
CHEMBL4646661	O=C(c1ccc(cc1)CO[N+](=O)[O-])NC1CCN(CC1)Cc1ccccc1	7.66
CHEMBL4643104	O=C(c1ccc(cc1)CO[N+](=O)[O-])NCCN1CCC(CC1)Cc1ccccc1	7.05
CHEMBL4279550	O=C(c1ccc(cc1)c1ccccc1)CCN1CCCCC1	7.82
CHEMBL4294260	O=C(c1ccc(cc1)c1ccccc1)CCN1CCOCC1	8.54
CHEMBL4291311	O=C(c1ccc2c(c1)cccc2)CCCN1CCC(CC1)Cc1ccccc1	7.62
CHEMBL4289910	O=C(c1ccc2c(c1)cccc2)CCN1CCCCC1	8.66
CHEMBL543939	O=C(c1ccc2c(c1)cccc2)CCN1CCOCC1	8.05
CHEMBL4285906	O=C(c1ccc2c(c1)cccc2)CN1CCC(CC1)Cc1ccccc1	7.57
CHEMBL4633788	O=C(c1ccc2c(n1)cccc2)N1CCCN(CC1)Cc1ccccc1	7.72
CHEMBL4640809	O=C(c1cccc2c1cccc2)N1CCCN(CC1)Cc1ccccc1	7.39
CHEMBL4284860	O=C(c1ccccc1)CCN1CCC(CC1)Cc1ccccc1	7.8
CHEMBL4294340	O=C(c1ccccc1)CN1CCC(CC1)Cc1ccccc1	7.12
CHEMBL1877016	O=C(c1ccccc1F)NC1CCN(CC1)Cc1ccccc1	8.47
CHEMBL3936289	O=C1CC2CCN(C3C2C(C1Cc1ccccc1)CCC3)C	8.82
CHEMBL3945203	O=C1CC2CCN(C3C2C(C1Cc1ccccc1)CCC3)CC1CCCCC1	8.52
CHEMBL3980626	O=C1CC2CCN(C3C2C(C1Cc1ccccc1)CCC3)Cc1cccs1	8.52
CHEMBL3910552	O=C1CC2CCN(C3C2C(C1Cc1ccccc1)CCC3)Cc1nccs1	8.52
CHEMBL3235448	O=C1CCN(CC1)CCCOc1ccc2c(c1)N(Cc1ccccc1)C(=O)CC2	7.01
CHEMBL3235456	O=C1CCc2c(N1)cc(cc2)OCCCN1CCCCC1	7.05
CHEMBL3235457	O=C1CCc2c(N1C)cc(cc2)OCCCN1CCCCC1	7.46
CHEMBL4459690	O=C1CCc2c(N1CCCCN1CCC3(CC1)OCc1c3cccc1)cccc2	7.74
CHEMBL4581662	O=C1CCc2c(N1CCCCN1CCN(CC1)C1CCCCC1)cccc2	7.68
CHEMBL4072818	O=C1CCc2c(N1CCCN1CCC(CC1)Cc1ccccc1)cccc2	8
CHEMBL3235437	O=C1CCc2c(N1CCc1ccccc1)cc(cc2)OCCCN1CCOCC1	7.67
CHEMBL3235451	O=C1CCc2c(N1Cc1ccccc1)cc(cc2)OCCCN1CCCC1	7.62
CHEMBL3235442	O=C1CCc2c(N1Cc1ccccc1)ccc(c2)OCCCCCN1CCOCC1	7.15
CHEMBL3805640	O=C1CN(C(=O)c2ccccc2)C2(C(=O)N1C1CCCCC1)CCCC2	7.1
CHEMBL3805031	O=C1CN(C(=O)c2ccccc2)C2(C(=O)N1C1CCCCC1)CCN(CC2)Cc1ccccc1	8.14
CHEMBL4439908	O=C1COC2(CN1c1ccccc1)CCN(CC2)CCc1ccccc1	7.24
CHEMBL2349459	O=C1Cc2c(csc2C2(O1)CCN(CC2)Cc1ccccc1)c1ccccc1	8.28
CHEMBL2349454	O=C1Cc2c(scc2C2(O1)CCN(CC2)Cc1ccccc1)c1ccccc1	8.6
CHEMBL2349458	O=C1Cc2cc(sc2C2(O1)CCN(CC2)Cc1ccccc1)c1ccccc1	7.64
CHEMBL138286	O=C1Cc2ccccc2C2(O1)CCN(CC2)Cc1ccccc1	7.48
CHEMBL2346692	O=C1Cc2cscc2C2(O1)CCN(CC2)Cc1ccccc1	7.4
CHEMBL1830692	O=C1N(CCCN2CCN(CC2)C2CCCCC2)CCc2c1cccc2	7.61
CHEMBL2349446	O=C1OC2(c3c1c(sc3)c1cccc3c1cccc3)CCN(CC2)Cc1ccccc1	8.28
CHEMBL2349461	O=C1OC2(c3c1c(sc3)c1ccccc1)CCN(CC2)Cc1ccccc1	7.96
CHEMBL2349555	O=C1OC2(c3c1c(sc3c1ccccc1)c1ccccc1)CCN(CC2)Cc1ccccc1	7.06
CHEMBL343793	O=C1OC2(c3c1cccc3)CCN(CC2)Cc1ccccc1	7.68
CHEMBL2349453	O=C1OC2(c3c1csc3)CCN(CC2)Cc1ccccc1	7.8
CHEMBL2391076	O=S(=O)(N1CCC(CC1)Cc1ccccc1)CCc1ccccc1	7.22
CHEMBL2391068	O=S(=O)(N1CCC(CC1)Cc1ccccc1)Cc1ccccc1	8
CHEMBL2391077	O=S(=O)(N1CCN(CC1)Cc1ccccc1)CCc1ccccc1	7.11
CHEMBL1327876	O=S(=O)(N1CCN(CC1)Cc1ccccc1)Cc1ccccc1	7.95
CHEMBL2391073	O=S(=O)(c1ccccc1)N1CCC(CC1)Cc1ccccc1	7.61
CHEMBL272551	O=S(=O)(c1ccccc1)N1CCN(CC1)Cc1ccccc1	7.55
CHEMBL3806105	O=c1ccc(nn1c1ccc2c(c1)cccc2)OCCCN1CCCCC1	7.13
CHEMBL3805441	O=c1ccc(nn1c1ccccc1)OCCCN1CCOCC1	7.18
CHEMBL4446466	O=c1oc(nn1CCCCN1CCC2(CC1)OCc1c2cccc1)c1ccccc1	7.72
CHEMBL4451677	O=c1oc(nn1CCCCN1CCN(CC1)C1CCCCC1)c1ccccc1	7.46
CHEMBL4635958	OC(Cc1ccc(cc1)F)CN1CCN(CC1)CCSC(c1ccc(cc1)F)c1ccc(cc1)F	7.53
CHEMBL4642082	OC(Cc1ccc(cc1)F)CN1CCN(CC1)CC[S+](C(c1ccc(cc1)F)c1ccc(cc1)F)[O-]	7.13
CHEMBL4640772	OC(Cc1ccccc1)CN1C(C)CN(CC1C)CCSC(c1ccc(cc1)F)c1ccc(cc1)F	7.82
CHEMBL4639814	OC(Cc1ccccc1)CN1C(C)CN(CC1C)CC[S+](C(c1ccc(cc1)F)c1ccc(cc1)F)[O-]	7.12
CHEMBL495519	OC(Cc1ccccc1)CN1CCN(CC1)CCCN(c1ccc(cc1)F)c1ccc(cc1)F	7.515
CHEMBL4798638	OC(Cc1ccccc1)CNC1CCN(CC1)CCSC(c1ccc(cc1)F)c1ccc(cc1)F	7.06
CHEMBL5205672	OC(c1ccccc1)CN1C2CCC1C/C(=C\c1ccccc1)/C2	8.7
CHEMBL5201372	OC(c1ccccc1)CN1C2CCC1CC(C2)Cc1ccccc1	8.5275
CHEMBL1172212	OC1(CCN(CC1)Cc1cc2c(s1)cccc2)c1ccccc1	8.67
CHEMBL3781632	OC1(CCN(CC1)Cc1ccccc1)c1nccs1	7.48
CHEMBL4218465	OC1C(C)N(CCCCCc2ccccc2)CCc2c1cccc2	8
CHEMBL3770589	OC1C(CCC1(c1ccccc1)c1ccccc1)CN1CCN(CC1)Cc1ccccc1	7.435
CHEMBL516814	OC1CC(CCC1N1CCC(CC1)c1ccccc1)OCc1ccc(cc1)F	7.67
CHEMBL3818045	OC1CC2CN(C1CN2Cc1ccc(cc1)c1ccccc1)CC1CCCCC1	7.905
CHEMBL3817940	OC1CC2CN(C1CN2Cc1cccc2c1cccc2)CC1CCCCC1	8.35
CHEMBL3819146	OC1CCC2N(CC1N(CC1CCCCC1)C2)Cc1ccccc1	8.51
CHEMBL242077	OC1CCC2N(CC1N(CCc1ccccc1)C2)Cc1ccccc1	7.505
CHEMBL1204032	OC1CCCCC1N1CCC(CC1)C(=O)c1ccc(cc1)Br	7.8
CHEMBL1204034	OC1CCCCC1N1CCC(CC1)C(=O)c1ccc(s1)Br	7.53
CHEMBL1204035	OC1CCCCC1N1CCC(CC1)C(=O)c1ccc(s1)I	8.03
CHEMBL1822239	OC1CCCCC1N1CCC(CC1)c1ccc(cc1)C	8.09
CHEMBL20730	OC1CCCCC1N1CCC(CC1)c1ccccc1	7.314
CHEMBL129530	OC1CCN(CC1N1CCC(CC1)c1ccccc1)Cc1ccc(cc1)F	7.67
CHEMBL1822389	OC1CN(CCC1N1CCC(CC1)C(=O)c1ccc(cc1)F)Cc1cccnc1	7.64
CHEMBL1289057	OC1CN(CCc2c1ccc(c2)OCc1ccccc1)C1CCC(CC1)c1ccccc1	7.205
CHEMBL3597319	OC1Cc2c(CC1N1CCC(CC1)C(=O)c1ccc(cc1)F)cccc2O	7.54
CHEMBL4170826	OC1Cc2ccccc2C2(O1)CCC(CC2)N1CCN(CC1)C1CCCCC1	7.22
CHEMBL1170149	OC1Cc2ccccc2C2(O1)CCN(CC2)CCc1ccccc1	7.05
CHEMBL1204048	OC1Cc2ccccc2CC1N1CCC(CC1)C(=O)N1CCC(CC1)Cc1ccccc1	7.7
CHEMBL1204047	OC1Cc2ccccc2CC1N1CCC(CC1)C(=O)N1CCC(CC1)c1ccccc1	7.3
CHEMBL2409373	OC1Cc2ccccc2CC1N1CCC(CC1)C(=O)c1ccc(cc1)N(C)C	7.39
CHEMBL2170657	OC1Cc2ccsc2C2(O1)CCN(CC2)Cc1ccccc1	7.8
CHEMBL1829665	OC1Cc2n(ncc2C2(O1)CCN(CC2)Cc1ccccc1)c1ccccc1	7.57
CHEMBL2064203	OC1Cc2sccc2C2(O1)CCN(CC2)Cc1ccccc1	8.44
CHEMBL1171689	OC1OC2(c3c1cccc3)CCN(CC2)CCc1ccccc1	7.925
CHEMBL4059616	OCC(N1CCCN(C(C1)Cc1ccccc1)Cc1ccccc1)c1ccccc1	7.105
CHEMBL3771017	OCC(OC(c1ccccc1)c1ccccc1)CN1CCN(CC1)Cc1ccccc1	7.95
CHEMBL2260849	OCC1(CC1CN(C12CC3CC(C2)CC(C1)C3)C)c1ccccc1	8.9
CHEMBL4088218	OCC1CN(CCCCc2ccccc2)CCc2c1cc(OC)cc2	7.1
CHEMBL513224	OCC1CN(CCCN1Cc1ccccc1)Cc1ccccc1	8.13
CHEMBL502377	OCC1CN(CCN1Cc1ccccc1)Cc1ccc(cc1)OC	7.92
CHEMBL2391057	OCC1CN(CCc2ccccc2)CCN1Cc1ccccc1	7.42
CHEMBL4552298	OCC1NC2(CCN(CC2)C)C(=O)N(C1=O)c1c(C)cccc1C	7.24
CHEMBL358579	OCC1OC2(c3c1cccc3)CCN(CC2)Cc1ccccc1	8.35
CHEMBL3233526	OCCC1CN(CCC(C)C)CCN1Cc1ccccc1	7.34
CHEMBL3218883	OCCC1CN(CCN1CC=C(C)C)Cc1ccc(cc1)OC	7.74
CHEMBL3104856	OCCC1CN(CCN1Cc1ccc(cc1)c1ccccc1)CC1CCCCC1	8.285
CHEMBL3233533	OCCC1CN(CCN1Cc1ccc2c(c1)ccc(c2)OC)CC1CCCCC1	7.37
CHEMBL3233531	OCCC1CN(CCN1Cc1cccc2c1cccc2)CC1CCCCC1	8.885
CHEMBL4172125	OCCC1Cc2ccccc2C2(O1)CCC(CC2)N1CCN(CC1)C1CCCCC1	7.38
CHEMBL1171865	OCCC1Cc2ccccc2C2(O1)CCN(CC2)CC1CCCCC1	8.01167
CHEMBL1169963	OCCC1Cc2ccccc2C2(O1)CCN(CC2)CCCc1ccccc1	7.475
CHEMBL2064186	OCCC1Cc2sccc2C2(O1)CCN(CC2)Cc1ccccc1	7.57
CHEMBL3827079	OCCC1OC(CCN2CCC(CC2)c2ccccc2)c2c(C1)cccc2	7.28
CHEMBL1645211	OCCC1OC2(c3c1cccc3)CCN(CC2)C(c1ccccc1)C	7.57
CHEMBL1645208	OCCC1OC2(c3c1cccc3)CCN(CC2)CC1CCCCC1	8.17
CHEMBL1645206	OCCC1OC2(c3c1cccc3)CCN(CC2)Cc1ccc(cc1)F	8.21
CHEMBL578041	OCCCC1OC2(c3c1cccc3)CCN(CC2)Cc1ccccc1	8.48
CHEMBL4637655	OCc1cc2c(s1)CCC(CC2)N(CCCc1ccccc1)C	8.19
CHEMBL4637229	OCc1cc2c(s1)CCC(CC2)NCCCc1ccccc1	7.21
CHEMBL4287755	OCc1ccc2c(c1)CCC(CC2)NCCCCc1ccccc1	7.39
CHEMBL2064205	ON=Cc1sc2c(c1)C1(CCN(CC1)Cc1ccccc1)OC(C2)OC	7.41
CHEMBL305187	Oc1ccc(cc1)C(C(N1CCC(CC1)Cc1ccccc1)C)O	7.09875
CHEMBL4085956	Oc1ccc2c(c1)C1(C)CCN(C(C2)C1C)CCc1ccccc1	8.08273
CHEMBL4206913	Oc1ccc2c(c1)CCN(C(C2O)C)CCCCc1ccccc1	7.07
CHEMBL4588347	Oc1ccc2c(c1)CCN(CC2)CCCCc1ccccc1	7.49
CHEMBL4291296	Oc1ccc2c(c1)c(=O)cc(o2)C(=O)NCCC1CCN(CC1)Cc1ccccc1	7.38
CHEMBL535634	Oc1ccc2c(c1)c(CCCN1CCN(CC1)C1CCCCC1)ccc2	8.26
CHEMBL3950888	Oc1ccc2c(c1)ccc(c2)/C(=C/CN1CCC(CC1)Cc1ccccc1)/C	8.02
CHEMBL3931167	Oc1ccc2c(c1)ccc(c2)C(CCN1CCC(CC1)Cc1ccccc1)(O)C	7.31
CHEMBL3913896	Oc1ccc2c(c1)ccc(c2)C(CCN1CCC(CC1)Cc1ccccc1)C	7.52667
CHEMBL541390	Oc1ccc2c(c1)cccc2CCCN1CCN(CC1)C1CCCCC1	8.17
CHEMBL4634076	[O-][N+](=O)OCc1ccc(cc1)C(=O)NCCCCCN1CCC(CC1)Cc1ccccc1	7.03
CHEMBL4646941	[O-][N+](=O)OCc1cccc(c1)C(=O)NC1CCN(CC1)Cc1ccccc1	7.62
CHEMBL4632866	[O-][N+](=O)OCc1cccc(c1)C(=O)NCCCCCN1CCC(CC1)Cc1ccccc1	7.3
CHEMBL4648130	[O-][N+](=O)OCc1cccc(c1)C(=O)NCCN1CCC(CC1)Cc1ccccc1	7.31
CHEMBL1822598	[O-][N+](=O)c1ccc(c2c1non2)NCCOCCOc1cccc2c1CCCC2CCCN1CCN(CC1)C1CCCCC1	7.02
CHEMBL414138	[O-][N+](=O)c1ccc(cc1)CN1CCN(CC1)CCCc1ccccc1	9.43
CHEMBL2170660	[O-][N+](=O)c1ccc(cc1)c1scc2c1CCOC12CCN(CC1)Cc1ccccc1	8.77
CHEMBL4069507	[O-][N+](=O)c1ccc(cc1C(F)(F)F)NCCCCN1CCC(CC1)Cc1ccccc1	7.7
CHEMBL3735947	[O-][N+](=O)c1ccc2c(c1)CCC(CC2)NCCCc1ccccc1	7.74
CHEMBL3735173	[O-][N+](=O)c1ccc2c(c1)CCC(CC2)NCc1ccccc1	7.68
CHEMBL272050	[O-][N+](=O)c1cccc(c1)CN1CCN(CC1)CCCc1ccccc1	9.03
CHEMBL272819	[O-][N+](=O)c1ccccc1CN1CCN(CC1)CCCc1ccccc1	8.55
CHEMBL4645855	[O-][S+](C(c1ccc(cc1)F)c1ccc(cc1)F)CCCN1CCN(CC1)CCCc1ccccc1	7.4
CHEMBL3357791	c1ccc(cc1)C1CCC(CC1)NC1CCc2c(CC1)cccc2	7.775
CHEMBL4746028	c1ccc(cc1)C1CCN(CC1)C1CCc2c(C1)cccc2	8.72
CHEMBL3357788	c1ccc(cc1)C1CCN(CC1)C1CCc2c(CC1)cccc2	7.66
CHEMBL4745685	c1ccc(cc1)C1CCN(CC1)C1Cc2c(C1)cccc2	7.36
CHEMBL4740593	c1ccc(cc1)CC1CCN(CC1)C1CCc2c(C1)cccc2	8.22
CHEMBL3357790	c1ccc(cc1)CC1CCN(CC1)C1CCc2c(CC1)cccc2	8.24
CHEMBL4758763	c1ccc(cc1)CC1CCN(CC1)C1Cc2c(C1)cccc2	7.29
CHEMBL3769675	c1ccc(cc1)CC1CCN(CC1)CC1COC(O1)(C1CCCCC1)c1ccccc1	7.265
CHEMBL3770830	c1ccc(cc1)CC1CCN(CC1)CC1COC(O1)(c1ccccc1)c1ccccc1	8.66
CHEMBL3771186	c1ccc(cc1)CC1CCN(CC1)CC1COC(S1)(c1ccccc1)c1ccccc1	7.92
CHEMBL178700	c1ccc(cc1)CC1CCN(CC1)CC1COc2c(O1)cccc2	7.78
CHEMBL3770762	c1ccc(cc1)CC1CCN(CC1)CC1CSC(S1)(c1ccccc1)c1ccccc1	7.82
CHEMBL3770681	c1ccc(cc1)CC1CCN(CC1)CCOC(c1ccccc1)c1ccccc1	7.25
CHEMBL4073530	c1ccc(cc1)CCCCCN1CCCCC1Cc1ccccc1	10.1
CHEMBL4094187	c1ccc(cc1)CCCCN1CCCN(C(C1)Cc1ccccc1)Cc1ccccc1	7.485
CHEMBL4778291	c1ccc(cc1)CCCCN1CCCc2c(CC1)cccc2	7.66
CHEMBL178153	c1ccc(cc1)CCCN1CCC(CC1)Cc1ccccc1	9.4
CHEMBL3220586	c1ccc(cc1)CCCN1CCC2(CC1)CCCc1c2ccs1	7.34
CHEMBL1170546	c1ccc(cc1)CCCN1CCC2(CC1)OCCc1c2cnn1c1ccccc1	8.94667
CHEMBL3360026	c1ccc(cc1)CCCN1CCN(CC1)CCc1ccc2c(c1)OCCO2	7.99
CHEMBL273041	c1ccc(cc1)CCCN1CCN(CC1)Cc1ccccc1	8.44
CHEMBL25858	c1ccc(cc1)CCCNC1CCc2c(C1)cccc2	7.23
CHEMBL4078572	c1ccc(cc1)CCN1CCCN(C(C1)Cc1ccccc1)Cc1ccccc1	7.34
CHEMBL3357786	c1ccc(cc1)CCNC1CCc2c(CC1)cccc2	7.66
CHEMBL3220589	c1ccc(cc1)CN1CCC2(C1)CCCc1c2ccs1	7.54
CHEMBL303336	c1ccc(cc1)CN1CCC2(CC1)CCCc1c2cccc1	8.7
CHEMBL3805784	c1ccc(cc1)CN1CCC2(CC1)N=Nc1c(N2)cccc1	9.22
CHEMBL2064200	c1ccc(cc1)CN1CCC2(CC1)OC=Cc1c2ccs1	8.7
CHEMBL3309614	c1ccc(cc1)CN1CCC2(CC1)OC=Cc1c2cncc1	8.34
CHEMBL1829667	c1ccc(cc1)CN1CCC2(CC1)OC=Cc1c2cnn1c1ccccc1	8.83
CHEMBL2170658	c1ccc(cc1)CN1CCC2(CC1)OC=Cc1c2scc1	8.47
CHEMBL2064198	c1ccc(cc1)CN1CCC2(CC1)OCCc1c2ccs1	9.51
CHEMBL3309615	c1ccc(cc1)CN1CCC2(CC1)OCCc1c2cncc1	7.72
CHEMBL2170667	c1ccc(cc1)CN1CCC2(CC1)OCCc1c2csc1	9.46
CHEMBL2170499	c1ccc(cc1)CN1CCC2(CC1)OCCc1c2csc1c1cccc2c1cccc2	8.4
CHEMBL2170675	c1ccc(cc1)CN1CCC2(CC1)OCCc1c2sc(c1)c1ccccc1	8.62
CHEMBL2170655	c1ccc(cc1)CN1CCC2(CC1)OCCc1c2scc1	9
CHEMBL2170502	c1ccc(cc1)CN1CCC2(CC1)OCCc1c2scc1c1ccccc1	8.8
CHEMBL4225497	c1ccc(cc1)CN1CCC23C(C1)(CCCC3)CCC2	7.77
CHEMBL3770072	c1ccc(cc1)CN1CCN(CC1)CC1CCC(O1)(c1ccccc1)c1ccccc1	7.06
CHEMBL3769960	c1ccc(cc1)CN1CCN(CC1)CC1COC(O1)(C1CCCCC1)c1ccccc1	8.24
CHEMBL3770485	c1ccc(cc1)CN1CCN(CC1)CC1COC(O1)(c1ccccc1)c1ccccc1	8.77
CHEMBL3770832	c1ccc(cc1)CN1CCN(CC1)CC1COC(S1)(c1ccccc1)c1ccccc1	7.2
CHEMBL359663	c1ccc(cc1)CN1CCN(CC1)CC1COc2c(O1)cccc2	7.8
CHEMBL3769825	c1ccc(cc1)CN1CCN(CC1)CCOC(c1ccccc1)c1ccccc1	7.69
CHEMBL162522	c1ccc(cc1)CN1CCN(CC1)Cc1ccccc1	8.24
CHEMBL4243296	c1ccc(cc1)CN1CC[Si]2(CC1)CCCc1c2cccc1	8.96
CHEMBL4797610	c1ccc(cc1)CNC1CCCC2(C1)OCCc1c2cccc1	7.02
CHEMBL4574247	c1ccc(cc1)CNC1CCc2c(CC1)ccs2	7.1
CHEMBL3633403	c1ccc(cc1)CNCC1OCC(OC1)(c1ccccc1)c1ccccc1	8.13
CHEMBL3633402	c1ccc(cc1)CNCC1OCC(OC1)c1ccccc1	7.075
CHEMBL4756284	c1ccc(cc1)CNCCC1CCCC(C1)c1ccccc1	8.84167
CHEMBL4858036	c1ccc(cc1)CNCCC1CCCC(O1)c1ccccc1	8.535
CHEMBL2170312	c1ccc(cc1)CNCCC1CCOC(O1)c1ccccc1	7.74667
CHEMBL4076971	c1ccc(cc1)CNCCC1OC2OC(C1)c1c(C2)cccc1	7.875
CHEMBL4759075	c1ccc(cc1)COC(C1CCN(Cc2c1cccc2)Cc1ccccc1)c1ccccc1	8.05
CHEMBL4749981	c1ccc(cc1)N1CCN(CC1)CCC1CCCC(C1)c1ccccc1	7.845
CHEMBL4865171	c1ccc(cc1)N1CCN(CC1)CCC1CCCC(O1)c1ccccc1	7.46
CHEMBL3359232	c1ccc(cc1)c1nc(OCCCN2CCCC2)c2c(n1)CCC2	7.23
CHEMBL3360021	BrCCOc1ccc(cc1OC)CCN1CCN(CC1)CCCc1ccccc1	7.6
CHEMBL4645300	Brc1cc2c(s1)CCC(CC2)NCCCCc1ccccc1	7.85
CHEMBL2391080	Brc1ccc(cc1)/C=C/S(=O)(=O)N1CCN(CC1)Cc1ccccc1	5.97
CHEMBL1204040	Brc1ccc(cc1)C(=O)C1CCN(CC1)C1Cc2c(N)cccc2CC1O	6.4
CHEMBL3099053	Brc1ccc(cc1)C1(O)CCN(CC1)CC(=O)c1c[nH]c2c1cc(O)cc2	6.73
CHEMBL1204045	Brc1ccc(s1)C(=O)C1CCN(CC1)C1Cc2cccc(c2CC1O)N	6.32
CHEMBL260826	Brc1cccc(c1)C(CN1C2CCC1CC(C2)c1ccccc1)O	6.26
CHEMBL348313	Brc1cccc(c1)CN1C2C3C4C1(O)C1C2C2C3CC4C12	6.68
CHEMBL3262788	C#CCOc1ccc(cc1C(=O)NCCCCN1CCc2c(C1)cc(c(c2)OC)OC)C#N	5.43
CHEMBL1783463	C(CCC1CCOC(O1)c1ccccc1)NCc1ccccc1	6.79
CHEMBL4288091	C(CCc1ccccc1)CNC1CCc2c(CC1)cccn2	6.67
CHEMBL2436336	C(CCc1ccccc1)NCCC1CCCc2c1ccs2	6.88
CHEMBL296601	C(NC1CCc2c(CC1)cccc2)CCc1ccccc1	6.82
CHEMBL1917706	C/C(=C\CN1CCCCC1)/c1ccccc1	6.34
CHEMBL1917716	C/C(=C\CN1CCOCC1)/c1ccccc1	6
CHEMBL3769874	C1CCC(CC1)C1(OCC(O1)CN1CCC(CC1)Cc1ccccc1)C1CCCCC1	6.68
CHEMBL536305	C1CCC(CC1)N1CCN(CC1)CCCn1c2ccccc2c2c1cccc2	5.46
CHEMBL574182	C1CCC(CC1)N1CCNCC1	5.3
CHEMBL3359216	C1CCN(CC1)CCCOc1cc(nc(n1)c1ccccc1)C1CC1	6.6
CHEMBL3359233	C1CCN(CC1)CCCOc1nc(nc2c1CCCC2)c1ccccc1	6.86
CHEMBL75228	C1CCN(CC1)CCc1ccccc1	6.51
CHEMBL4065052	C=CC1CN(CCCCc2ccccc2)CCc2c1cc(OC)cc2	6.91
CHEMBL508251	C=CCN1C2CCCC1CC(C2)OC(=O)Nc1cc(C)ccc1OC	5.9
CHEMBL520707	C=CCN1CC2C(=O)CCC1CN2Cc1ccc(cc1)OC	6.03
CHEMBL2021509	C=CCN1CC2C(CCC1CN2Cc1ccc(cc1)OC)COc1ccccc1	5.57333
CHEMBL520708	C=CCN1CC2C(CCC1CN2Cc1ccc(cc1)OC)O	5.3775
CHEMBL2021503	C=CCN1CC2C(CCC1CN2Cc1ccc(cc1OC)OC)COc1ccccc1	6.155
CHEMBL447904	C=CCN1CC2C(CCC1CN2Cc1ccc(cc1OC)OC)O	5.025
CHEMBL492565	C=CCN1CC2C(CCC1CN2Cc1ccc(cc1OC)OC)Oc1ccccc1	5.58
CHEMBL515840	C=CCN1CC2CCCC1CN2Cc1ccc(cc1OC)OC	6.41
CHEMBL492566	C=CCN1CC2N(CC1CC/C/2=C/c1ccccc1)Cc1ccc(cc1)OC	6.45
CHEMBL522703	C=CCN1CC2N(CC1CC/C/2=C/c1ccccc1)Cc1ccc(cc1OC)OC	6.415
CHEMBL486142	C=CCN1CC2N(CC1CCC2(OC)OC)Cc1ccc(cc1)OC	6.065
CHEMBL523038	C=CCN1CC2N(CC1Cc1c2[nH]c2c1cc(cc2)OC)Cc1ccc(cc1)OC	4.98
CHEMBL492576	C=CCN1CC2N(CC1Cc1c2nc2c(c1C)cccc2)Cc1ccc(cc1)OC	5.79
CHEMBL492777	C=CCN1CC2N(CC1Cc1c2nc2c(c1C)cccc2)Cc1ccc(cc1OC)OC	5.525
CHEMBL4095749	CC(=C)CN1CCN(CC1)c1ccc2c(c1)C1CC2CCN1C(=O)OCc1ccccc1	6.38
CHEMBL574165	CC(=O)N1CCN(CC1)C1CCCCC1	5.3
CHEMBL2170302	CC(C1(OCCC(O1)CCNCc1ccccc1)c1ccccc1)(C)C	6.745
CHEMBL4634776	CC(CN1C(C)CN(CC1C)CC[S+](C(c1ccc(cc1)F)c1ccc(cc1)F)[O-])O	6.5
CHEMBL4783618	CC(CN1CCC(CC1)NCCSC(c1ccc(cc1)F)c1ccc(cc1)F)(C)C	6.5
CHEMBL4764168	CC(CN1CCC(CC1)NCC[S+](C(c1ccc(cc1)F)c1ccc(cc1)F)[O-])(C)C	6.27
CHEMBL4647526	CC(CN1CCN(CC1)CC[S+](C(c1ccc(cc1)F)c1ccc(cc1)F)[O-])O	6.2325
CHEMBL30713	CC(Cc1c[nH]c2c1cccc2)N	5
CHEMBL5195239	CC(N(C(=O)c1ccco1)C1CCN(CC1)CCc1ccccc1)c1ccccc1	6.95
CHEMBL5092754	CC(N1CCC(CC1)Cc1ccccc1)CN(c1ccccc1)C(=O)C	6.95
CHEMBL3397620	CC(NC(=O)C1CCN(CC1)Cc1ccc(cc1Cl)Cl)C	5.7
CHEMBL3397618	CC(NC(=O)C1CCN(CC1)Cc1ccccc1)C	5.97
CHEMBL3359213	CC(c1cc(OCCCN2CCCCC2)nc(n1)c1ccccc1)C	6.73
CHEMBL3971471	CC(c1ccccc1)CCN(C)C	6.37
CHEMBL5082189	CC1(C)CCCC(N1CCOc1ccc(cc1)Cl)(C)C	5.3
CHEMBL538091	CC1(C)CCCN(C1)CCCCCn1c2ccccc2c2c1cccc2	6.86
CHEMBL536759	CC1(C)CCCN(C1)CCCn1c2ccccc2c2c1cccc2	5.69
CHEMBL1929285	CC1(C)CCCN(C1)CCCn1nnc2c1cccc2	6.47
CHEMBL1929428	CC1(C)CCCN(C1)CCNc1nc2c(s1)cccc2	6.25
CHEMBL1929429	CC1(C)CCCN(C1)CCNc1nccs1	6.34
CHEMBL1929283	CC1(C)CCCN(C1)Cc1cc2c(o1)cccc2	5.43
CHEMBL3805296	CC1CC(C)CN(C1)CCCCOc1ccc(=O)n(n1)c1ccccc1	6.65
CHEMBL3785134	CC1CCN(CC1)CCCCCCOc1nc(nc2c1CCCC2)c1ccccc1	5.7
CHEMBL3805917	CC1CCN(CC1)CCCCOc1ccc(=O)n(n1)c1ccccc1	6.84
CHEMBL275707	CC1CN(CCCn2c3ccccc3c3c2cccc3)CC(N1)C	6.045
CHEMBL4634934	CC1NC(C)CN(C1)CCSC(c1ccc(cc1)F)c1ccc(cc1)F	6.95
CHEMBL5196794	CCC(=O)N(C(c1ccccc1)C)C1CCN(CC1)CCc1ccccc1	6.95
CHEMBL5204271	CCC(=O)N(C1CCN(CC1)CCc1ccccc1)Cc1ccc(cc1)OC	6.97
CHEMBL5078787	CCC(=O)N(C1CCc2c1cccc2)CC(N1CCC(CC1)Cc1ccccc1)C	6.72
CHEMBL4781647	CCC(=O)N(CCc1ccccc1)CCN1CCC(CC1)Cc1ccccc1	6.57
CHEMBL5094445	CCC(=O)N(Cc1ccco1)CC(N1CCC(CC1)Cc1ccccc1)C	6.39
CHEMBL4788563	CCC(=O)N(c1cc(F)c(c(c1)F)F)CCN1CCC(CC1)Cc1ccccc1	6.24
CHEMBL5080562	CCC(=O)N(c1ccc(cc1)OC)CC(N1CCC(CC1)Cc1ccccc1)C	6.65
CHEMBL4787348	CCC(=O)N(c1ccc(cc1)OC)CCN1CCC(CC1)CCCc1ccccc1	6.05
CHEMBL4794751	CCC(=O)N(c1cccc(n1)C(F)(F)F)CCN1CCC(CC1)Cc1ccccc1	6.08
CHEMBL172155	CCC(=O)N(c1ccccc1)C1CCN(CC1)Cc1ccccc1	6.85
CHEMBL5087894	CCC(=O)N(c1ccccc1)CC(N1CCC(CC1)C)C	6
CHEMBL5092506	CCC(=O)N(c1ccccc1)CC(N1CCC(CC1)Cc1ccc(cc1)C)C	6.77
CHEMBL5087716	CCC(=O)N(c1ccccc1)CC(N1CCC(CC1)Cc1ccccc1)(C)C	6.81
CHEMBL5082953	CCC(=O)N(c1ccccc1)CC(N1CCC(CC1)Cc1ccccc1)CC	6.95
CHEMBL5082165	CCC(=O)N(c1ccccc1)CC(N1CCC(CC1)c1ccccc1)C	6.91
CHEMBL5081685	CCC(=O)N(c1ccccc1)CCN1CCCCC1	6
CHEMBL5079255	CCC(=O)N(c1ccccn1)CC(N1CCC(CC1)Cc1ccccc1)C	6.57
CHEMBL4783373	CCC(=O)N(c1ncccc1F)CCN1CCC(CC1)Cc1ccccc1	6.3
CHEMBL1094860	CCC(=O)N1CC2C(CCC1CN2C(=O)Cc1ccc(c(c1)Cl)Cl)N1CCCC1	6
CHEMBL3633208	CCC1(COCC(O1)CN)c1ccccc1	5
CHEMBL3633396	CCC1(COCC(O1)CNCc1ccccc1)c1ccccc1	6.245
CHEMBL1783457	CCC1(OCCC(O1)CCN(C)C)c1ccccc1	6.29
CHEMBL3945795	CCC1C(=O)CC2C3C1CCCC3N(CC2)C	6.86
CHEMBL3927917	CCC1C(=O)CC2C3C1CCCC3N(CC2)C(=O)NCc1ccc(cc1)Cl	6.14
CHEMBL3927338	CCC1C(=O)CC2C3C1CCCC3N(CC2)Cc1nccs1	6.39
CHEMBL3916685	CCC1C(=O)CC2C3C1CCCC3N(CC2)S(=O)(=O)c1ccc(cc1)C	5
CHEMBL3952259	CCC1C2CCCC3C2C(c2c1nc1ccccc1c2)CCN3C	6.72
CHEMBL222287	CCC1CC2CN3C1C(C2)c1[nH]c2c(c1CC3)cc(cc2)OC	6.6
CHEMBL5078652	CCCC(=O)N(c1ccccc1)CC(N1CCC(CC1)Cc1ccccc1)C	6.24
CHEMBL487088	CCCC(=O)OC(Cc1ccccc1)CN1CCN(CC1)CCCN(c1ccc(cc1)F)c1ccc(cc1)F	6.53
CHEMBL109	CCCC(C(=O)O)CCC	5
CHEMBL2170308	CCCC1(OCCC(O1)CCN)c1ccccc1	5
CHEMBL3397617	CCCCCC(NC(=O)C1CCN(CC1)Cc1ccc(cc1Cl)Cl)C	6.9
CHEMBL569344	CCCCCCCCCCN1CCCC2(C1)OC(OC)Cc1c2cccc1	5.52
CHEMBL1165772	CCCCCCCCN(CCCc1ccc(cc1)F)CCCCCCCC	6.18
CHEMBL5192784	CCCCCCN1CCN(CC1)CCC(=O)Nc1sc2c(n1)c(C)ccc2	6.62
CHEMBL1780002	CCCCCN(C1CCC2(CC1)OC(OC)Cc1c2cccc1)Cc1ccccc1	6
CHEMBL1163832	CCCCN(C(=O)CCc1ccc(cc1)F)CCCC	4.49
CHEMBL4216717	CCCCN1CC2OCCN(C2C(C1)N1CCCC1)C(=O)Cc1ccc(c(c1)Cl)Cl	6.72
CHEMBL3309609	CCCCN1CCC2(CC1)OC(OC)Cc1c2cncc1	6.92
CHEMBL1172688	CCCCN1CCCC2(C1)OC(OC)Cc1c2cccc1	6.696
CHEMBL4084922	CCCCN1CCCN(C(C1)Cc1ccccc1)C	6.935
CHEMBL3323513	CCCCN1CCN(C2C1CCCC2N1CCCC1)C(=O)Cc1ccc(c(c1)Cl)Cl	6.175
CHEMBL5192987	CCCCN1CCN(CC1)CCC(=O)Nc1sc2c(n1)c(C)ccc2	6.69
CHEMBL229857	CCCN(CCC)CCCCNC(=O)c1cc(I)c(cc1OC)NC(=O)C	5.11
CHEMBL395005	CCCN(CCC)CCCCNC(=O)c1ccc(cc1)I	5.89
CHEMBL1163916	CCCN(CCc1ccc(c(c1)I)N=[N+]=[N-])CCCc1ccc(cc1)F	5.14
CHEMBL1163915	CCCN(CCc1ccc(cc1)N)CCCc1ccc(cc1)F	5.59
CHEMBL1165644	CCCN(Cc1ccc(c(c1)I)N=[N+]=[N-])CCCc1ccc(cc1)F	4.05
CHEMBL1164056	CCCN(Cc1ccc(cc1)N)CCCc1ccc(cc1)F	6.79
CHEMBL512850	CCCN1CC2C(=O)CCC1CN2Cc1ccc(cc1)OC	6.83
CHEMBL1829663	CCCN1CCC2(CC1)OC(OC)Cc1c2cnn1C	6.46
CHEMBL3897499	CCCN1CCC2C3C1CCCC3C(c1c2cc2ccc(cc2n1)C(F)(F)F)CC	6.37
CHEMBL3935644	CCCN1CCC2C3C1CCCC3CC(=O)C2	6.68
CHEMBL4582146	CCCN1CCN(C2C1CCCC2N1CCCC1)C(=O)Cc1ccc(c(c1)Cl)Cl	5.74
CHEMBL4072304	CCCN1CCN(CC1)c1ccc2c(c1)C1CC2CCN1C(=O)OCc1ccccc1	6.64
CHEMBL1164167	CCCNCCc1ccc(cc1)[N+](=O)[O-]	5.65
CHEMBL4534460	CCCNc1nc(C#Cc2ccc(s2)Cl)nc2c1nc[nH]2	5.82
CHEMBL2435434	CCN(CCCC(NC(c1cc2C=CC(Oc2cc1OC)(C)C)C)C)CC	6.72
CHEMBL230692	CCN(CCNC(=O)c1cc(I)c(cc1OC)NS(=O)(=O)C)CC	6.1
CHEMBL230903	CCN(CCNC(=O)c1cc(I)c(cc1OC)NS(=O)(=O)c1ccc(cc1)C)CC	6.19
CHEMBL3259963	CCN(c1ccc2c(c1)oc(=O)c(c2)/C=C/C1=[N+](CCCCCC(=O)NCCCCCCOc2cccc3c2CCCC3CCCN2CCN(CC2)C2CCCCC2)c2c(C1(C)C)cccc2)CC	6.63
CHEMBL4203694	CCN1CC2OCCN(C2C(C1)N1CCCC1)C(=O)Cc1ccc(c(c1)Cl)Cl	6.41
CHEMBL5185552	CCN1CCN(CC1)CCC(=O)Nc1sc2c(n1)c(C)ccc2	6.27
CHEMBL4593728	CCNc1nc(C#Cc2ccc(s2)Cl)nc2c1nc[nH]2	5.94
CHEMBL1204050	CCOC(=O)C1CCN(CC1)C1Cc2ccccc2CC1O	6
CHEMBL2064196	CCOC(=O)C1OC2(CCN(CC2)Cc2ccccc2)c2c(C1)scc2	6.84
CHEMBL4167697	CCOC(=O)CC1Cc2ccccc2C2(O1)CCC(CC2)N1CCc2c(C1)cc(c(c2)OC)OC	6
CHEMBL4176252	CCOC(=O)CC1Cc2ccccc2C2(O1)CCC(CC2)NCc1ccc(cc1C)C	6.13
CHEMBL1170333	CCOC(=O)CC1Cc2ccccc2C2(O1)CCN(CC2)Cc1ccccc1	6.05
CHEMBL4164801	CCOC(=O)CCN1CCN(CC1)c1ccc2c(c1)C1CC2CCN1C(=O)OCc1ccccc1	5.18
CHEMBL4159034	CCOC(=O)CCN1CCN(CC1)c1ccc2c(c1)CN(CCC2)C(=O)OCc1ccccc1	6.43
CHEMBL5203299	CCOCCN1CCN(CC1)CCC(=O)Nc1sc2c(n1)c(C)ccc2	6.24
CHEMBL62023	CCn1c(=O)n(c2c1cccc2)C(=O)NC1CC2CCC(C1)N2C	5.2
CHEMBL223969	CN(C/C=C(/c1ccc2c(c1)ccc(c2)O)\C)C	6.64
CHEMBL224138	CN(C/C=C(/c1cccc2c1cccc2)\C)C	6.99
CHEMBL1917698	CN(C/C=C(/c1ccccc1)\C)C	6
CHEMBL5200121	CN(C1CCC2CC1N(CC2)C(=O)Cc1ccc(c(c1)Cl)Cl)C	6.77
CHEMBL4781486	CN(C1CCCC2(C1)OCCc1c2cccc1)Cc1ccccc1	6.56
CHEMBL4276754	CN(C1CCc2c(CC1)cccn2)CCCc1ccccc1	6.58
CHEMBL4853884	CN(CCC1CCCC(O1)c1ccccc1)C	6.495
CHEMBL1783453	CN(CCC1CCOC(O1)(c1ccccc1)c1ccccc1)C	6.18
CHEMBL4067949	CN(CCC1OC2OC(C1)c1c(C2)cccc1)C	6
CHEMBL1783462	CN(CCCC1CCOC(O1)c1ccccc1)C	5.91
CHEMBL3805206	CN(CCCOc1ccc(=O)n(n1)c1ccccc1)C	6.97
CHEMBL3786729	CN(CCCOc1nc(nc2c1CCC2)c1ccccc1)C	6.92
CHEMBL5207906	CN(CCN1CCN(CC1)CCC(=O)Nc1sc2c(n1)c(C)ccc2)C	6
CHEMBL12420	CN(CCc1c[nH]c2c1cccc2)C	4.82
CHEMBL3983403	CN(Cc1ccc(cc1)Cl)CCCCN1C(=O)c2c(C1=O)cccc2	5.52
CHEMBL3964306	CN(Cc1ccc(cc1)Cl)CCCCN1CCCCC1=O	6.11
CHEMBL3912537	CN(Cc1ccc(cc1)Cl)CCCCn1ccc2c1cccc2	5.36
CHEMBL3547159	CN(Cc1ccccc1)CCCCN1C(=O)c2c(C1=O)cccc2	6.07
CHEMBL3922582	CN(Cc1ccccc1)CCCCN1CCCCC1=O	5.52
CHEMBL3913581	CN(Cc1ccccc1)CCCCN1c2ccccc2C(=O)C1=O	6.28
CHEMBL396978	CN1CC2CCC(C1CN2Cc1ccccc1)O	5.46
CHEMBL4215892	CN1CC2OCCN(C2C(C1)N1CCCC1)C(=O)Cc1ccc(c(c1)Cl)Cl	6
CHEMBL5198839	CN1CCC(CC1)N1CCN(CC1)CCC(=O)Nc1sc2c(n1)c(C)ccc2	5.22
CHEMBL4069312	CN1CCCN(C(C1)Cc1ccccc1)Cc1ccccc1	6.45
CHEMBL575239	CN1CCN(CC1)C(=O)C	5.3
CHEMBL4793067	CN1CCN(CC1)Cc1nn(c(n1)c1ccc(cc1)C(C)(C)C)C	6.88
CHEMBL4176080	CN1CCN(CC1)c1ccc2c(c1)C1CC2CCN1C(=O)OCc1ccccc1	6.08
CHEMBL4069441	CN1CCN(CC1)c1ccc2c(c1)C1CC2CCN1S(=O)(=O)c1cc(Cl)cc(c1)Cl	6.24
CHEMBL4166883	CN1CCN(CC1)c1ccc2c(c1)CN(CCC2)C(=O)OCc1ccccc1	6.45
CHEMBL1169896	CN1CN(C2(C1=O)CCN(CC2)Cc1coc2c1cccc2)c1ccccc1	6.15
CHEMBL1169728	CN1CN(C2(C1=O)CCN(CC2)Cc1csc2c1cccc2)c1ccccc1	6.48
CHEMBL1783456	CNCCC1CCOC(O1)(CC)c1ccccc1	6.07
CHEMBL1783452	CNCCC1CCOC(O1)(c1ccccc1)c1ccccc1	5
CHEMBL1783461	CNCCCC1CCOC(O1)c1ccccc1	6.49
CHEMBL2409367	CNc1ccc(cc1)C(=O)C1CCN(CC1)C1Cc2ccccc2CC1O	6.225
CHEMBL1774582	COC(=O)C1(CC1CN1C2CCC1C=C(C2)c1ccc(cc1)Cl)c1ccccc1	6.55
CHEMBL3084361	COC(=O)C1(CC1CN1C2CCC1CC(C2)(O)c1ccc(cc1)Cl)c1ccccc1	6.82
CHEMBL222307	COC(=O)C1(CC1CN1CCN(CC1)c1ccccn1)c1ccc(cc1)Cl	6.15
CHEMBL222444	COC(=O)C1(CC1CN1CCN(CC1)c1ccccn1)c1ccc(cc1)[N+](=O)[O-]	6.11
CHEMBL222736	COC(=O)C1(CC1CN1CCN(CC1)c1ccccn1)c1ccccc1	5.88
CHEMBL222394	COC(=O)C1(CC1CN1CCN(CC1)c1ncccn1)c1ccc(cc1)C	6.45
CHEMBL221347	COC(=O)C1(CC1CN1CCN(CC1)c1ncccn1)c1ccc(cc1)Cl	6.46
CHEMBL374814	COC(=O)C1(CC1CN1CCN(CC1)c1ncccn1)c1ccc(cc1)N	5
CHEMBL434385	COC(=O)C1(CC1CN1CCN(CC1)c1ncccn1)c1ccc(cc1)OC	5.69
CHEMBL225653	COC(=O)C1(CC1CN1CCN(CC1)c1ncccn1)c1ccc(cc1)[N+](=O)[O-]	6.21
CHEMBL373686	COC(=O)C1(CC1CN1CCN(CC1)c1ncccn1)c1ccccc1	5.51
CHEMBL3827235	COC(=O)CC1OC(CCN2CCCCC2)c2c(C1)cccc2	6.2
CHEMBL3827274	COC(=O)CC1OC(CN2CCC(CC2)c2ccccc2)c2c(C1)cccc2	6.17
CHEMBL3828277	COC(=O)CC1OC(CN2CCCCC2)c2c(C1)cccc2	6.29
CHEMBL4074313	COC(=O)CCN1CCN(CC1)c1ccc2c(c1)C1CC2CCN1C(=O)OCc1ccccc1	5.67
CHEMBL1095183	COC(=O)N1CC2C(CCC1CN2C(=O)Cc1ccc(c(c1)Cl)Cl)N1CCCC1	6
CHEMBL518434	COC(CN1CCCN(C(C1)CO)Cc1ccccc1)OC	6.49
CHEMBL477037	COC(CN1CCN(C(C1)CO)Cc1ccccc1)OC	5
CHEMBL244450	COC1(OC)CCC2N(CC1N(C)C2)Cc1ccccc1	5.46
CHEMBL242297	COC1CCC2N(CC1N(C)C2)Cc1ccccc1	5.87
CHEMBL2170684	COC1Cc2cc(sc2C2(O1)CCN(CC2)Cc1ccccc1)c1ccc(cc1)c1ccccc1	6.68
CHEMBL1779997	COC1Cc2ccccc2C2(O1)CCC(CC2)N(C)C	6
CHEMBL1780001	COC1Cc2ccccc2C2(O1)CCC(CC2)N(Cc1ccccc1)CC	6.97
CHEMBL4160820	COC1Cc2ccccc2C2(O1)CCC(CC2)N1CCc2c(C1)cc(c(c2)OC)OC	6.095
CHEMBL4174683	COC1Cc2ccccc2C2(O1)CCC(CC2)NC1CCc2c(CC1)cccc2	6.29
CHEMBL4164032	COC1Cc2ccccc2C2(O1)CCC(CC2)NCCCc1cn(c2c1cccc2)c1ccc(cc1)F	6.1
CHEMBL1779996	COC1Cc2ccccc2C2(O1)CCC(CC2)NCc1ccc(cc1)OC	6.765
CHEMBL4167670	COC1Cc2ccccc2C2(O1)CCC(CC2)NCc1ccc(cc1C)C	6.065
CHEMBL4159761	COC1Cc2ccccc2C2(O1)CCC(CC2)NCc1ccccc1	6.535
CHEMBL1172687	COC1Cc2ccccc2C2(O1)CCCN(C2)CCc1ccccc1	6.1725
CHEMBL2035258	COC1Cc2ccccc2C2(O1)CCCN(C2)Cc1ccccc1	5.908
CHEMBL1171724	COC1Cc2n(C)ncc2C2(O1)CCN(CC2)Cc1ccccc1	6.96333
CHEMBL2170672	COC1Cc2sc(cc2C2(O1)CCN(CC2)Cc1ccccc1)c1ccc(cc1)OC	6.95
CHEMBL495310	COC1Cc2sccc2C2(O1)CCNCC2	6.22
CHEMBL1829567	COC1OC2(CCNCC2)c2c(C1)n(nc2)c1ccccc1	6
CHEMBL4458895	COC1OC2(c3c1cccc3)CCC(CC2)NCc1ccccc1	6.94
CHEMBL2035282	COC1OC2(c3c1cccc3)CCN(C2)CCCCn1cncc1	5.82
CHEMBL259941	COC1OC2(c3c1n(nc3)c1ccccc1)CCNCC2	5.92
CHEMBL5087044	COCC(=O)N(c1ccccc1)CC(N1CCC(CC1)Cc1ccccc1)C	6.73
CHEMBL1682081	COc1c(OC)cc(cc1C(=O)NCCCCN1CCc2c(CC1)cc(c(c2)OC)OC)Br	5.29
CHEMBL1682080	COc1c(OC)cc(cc1C(=O)NCCCCN1Cc2c(C1)cc(c(c2)OC)OC)Br	5.84
CHEMBL4759158	COc1c(OC)cc2c(c1OC)CCN(C2)CCC(=O)c1c(C)c(OC)c(c(c1OC)OC)OC	6
CHEMBL4796195	COc1c(OC)cc2c(c1OC)CCN(C2)CCCCC(=O)c1c(C)c(OC)c(c(c1OC)OC)OC	6
CHEMBL1682086	COc1cc(Br)cc(c1OC)C(=O)NCCCCN(CCc1ccccc1)C	6.23
CHEMBL394280	COc1cc(Br)cc(c1OC)C(=O)NCCCCN1CCc2c(C1)cc1c(c2)OCCCO1	5.84
CHEMBL246664	COc1cc(Br)cc(c1OC)C(=O)NCCCCN1CCc2c(C1)cc1c(c2)OCCO1	6.47
CHEMBL1830689	COc1cc(C(=O)NCCCN2CCN(CC2)C2CCCCC2)c(cc1OC)Br	6.57
CHEMBL1830688	COc1cc(C(=O)NCCCN2CCc3c(C2)cc(c(c3)OC)OC)c(cc1OC)Br	5.59
CHEMBL1813593	COc1cc(C)ccc1N1CCN(CC1)CCCCOc1ccc2c(c1)NC(=O)CC2	6.42
CHEMBL3355367	COc1cc(CCN(CCCCc2cn(c3c2cccc3)c2ccc(cc2)F)C)ccc1OC	6.47
CHEMBL391153	COc1cc(CCNCCCCNC(=O)c2cc(Br)cc(c2OC)OC)ccc1OC	6.06
CHEMBL3355364	COc1cc(CCNCCCCc2cn(c3c2cccc3)c2ccc(cc2)F)ccc1OC	6.03
CHEMBL4526748	COc1cc(CCNc2nc(C#Cc3ccc(s3)Cl)nc3c2nc[nH]3)ccc1O	5.86
CHEMBL387647	COc1cc(NC(=O)C)c(cc1C(=O)NCCCCN(C(C)C)C)I	5.28
CHEMBL230693	COc1cc(NC(=O)C)c(cc1C(=O)NCCCCNN1CC2CC1CC2)I	6.17
CHEMBL3354884	COc1cc2CCN(C(=O)c2cc1OC)CCCCc1cn(c2c1cccc2)c1ccc(cc1)F	5.3
CHEMBL4749663	COc1cc2CCN(Cc2c(c1OC)OC)CCC(=O)c1c(C)c(OC)c(c(c1OC)OC)OC	6
CHEMBL4744206	COc1cc2CCN(Cc2c(c1OC)OC)CCCCCC(=O)c1c(C)c(OC)c(c(c1OC)OC)OC	6
CHEMBL4162732	COc1cc2CCN(Cc2cc1OC)CCC(=O)c1c(C)c(OC)c(c(c1O)OC)OC	6
CHEMBL4778965	COc1cc2CCN(Cc2cc1OC)CCC(=O)c1c(C)c(OC)c(c(c1OC)OC)OC	5.5
CHEMBL4778377	COc1cc2CCN(Cc2cc1OC)CCCC(=O)c1c(C)c(OC)c(c(c1OC)OC)OC	6
CHEMBL4744466	COc1cc2CCN(Cc2cc1OC)CCCCCC(=O)c1c(C)c(OC)c(c(c1OC)OC)OC	6
CHEMBL3401453	COc1cc2CCN(Cc2cc1OC)CCCCCCNc1cc(ccc1C(=O)N)n1nc(c2c1CC(C)(C)CC2=O)C	6
CHEMBL3354882	COc1cc2CCN(Cc2cc1OC)CCCCc1cn(c2c1cccc2)c1ccc(cc1)F	6.4625
CHEMBL4169201	COc1cc2CCN(Cc2cc1OC)CCCCn1cnc2c(c1=O)cc(c(c2)OC)OC	6
CHEMBL2437382	COc1cc2CCN(Cc2cc1OC)CCCN1CCc2c(C1=O)cc(c(c2)OC)OC	5.59
CHEMBL4104454	COc1cc2CCN(Cc2cc1OC)CCCNc1ccc(c(c1)C(F)(F)F)[N+](=O)[O-]	6.67
CHEMBL4161270	COc1cc2CCN(Cc2cc1OC)CCCn1cnc2c(c1=O)cc(c(c2)OC)OC	6
CHEMBL4079680	COc1cc2CCN(Cc2cc1OC)CCNc1ccc(c(c1)C(F)(F)F)[N+](=O)[O-]	5.41
CHEMBL3354887	COc1cc2CN(CCCC(=O)n3c4ccccc4c4c3cccc4)CCc2cc1OC	5.3
CHEMBL1830683	COc1cc2CN(CCCC3CCCc4c3cccc4OC)CCc2cc1OC	6.82
CHEMBL4439170	COc1cc2CN(CCCCN3C(=O)CCc4c3cccc4)CCc2cc1OC	6.94
CHEMBL3262520	COc1cc2CN(CCCCNC(=O)c3c[nH]nn3)CCc2cc1OC	4.96
CHEMBL1682083	COc1cc2CN(CCCCNC(=O)c3cc(Br)cc(c3OC)OC)CCCc2cc1OC	5.68
CHEMBL1830682	COc1cc2CN(CCCCNC(=O)c3cc(C)ccc3OC)CCc2cc1OC	5.67
CHEMBL3262784	COc1cc2CN(CCCCNC(=O)c3ccc(cc3)c3nnn(c3)Cc3ccccc3OC)CCc2cc1OC	5.07
CHEMBL3262524	COc1cc2CN(CCCCNC(=O)c3nnn(c3)Cc3ccccc3)CCc2cc1OC	5.35
CHEMBL3262521	COc1cc2CN(CCCCNC(=O)c3nnn(c3)Cc3ccccc3OC)CCc2cc1OC	4.69
CHEMBL3262517	COc1cc2CN(CCCCNC(=O)c3nnn(c3)c3ccccc3OC)CCc2cc1OC	4.88
CHEMBL3401451	COc1cc2CN(CCCCNc3cc(ccc3C(=O)N)n3nc(c4c3CC(C)(C)CC4=O)C)CCc2cc1OC	6
CHEMBL3354886	COc1cc2CN(CCCCn3c4ccccc4c4c3cccc4)CCc2cc1OC	5.66
CHEMBL4164925	COc1cc2CN(CCCCn3cnc4c(c3=O)cc(c(c4)Cl)[N+](=O)[O-])CCc2cc1OC	6
CHEMBL4446009	COc1cc2CN(CCCCn3nc(oc3=O)c3ccccc3)CCc2cc1OC	5.8
CHEMBL2437385	COc1cc2CN(CCCN3CCc4c(C3=O)c(OC)ccc4)CCc2cc1OC	5.79
CHEMBL2437383	COc1cc2CN(CCCN3CCc4c(C3=O)ccc(c4)F)CCc2cc1OC	6.51
CHEMBL1830690	COc1cc2CN(CCCNC(=O)C3CCCc4c3cccc4OC)CCc2cc1OC	6.84
CHEMBL1830686	COc1cc2CN(CCCNC(=O)c3cc(Br)cc(c3OC)OC)CCc2cc1OC	5.36
CHEMBL1830684	COc1cc2CN(CCCNC(=O)c3cc(C)ccc3OC)CCc2cc1OC	6.27
CHEMBL4160449	COc1cc2CN(CCCn3cnc4c(c3=O)cc(c(c4)Cl)[N+](=O)[O-])CCc2cc1OC	6
CHEMBL3262531	COc1cc2CN(CCNC(=O)c3nnn(c3)Cc3ccccc3OC)CCc2cc1OC	4.73
CHEMBL3262529	COc1cc2CN(CCNC(=O)c3nnn(c3)c3ccccc3OC)CCc2cc1OC	4.81
CHEMBL3401449	COc1cc2CN(CCNc3cc(ccc3C(=O)N)n3nc(c4c3CC(C)(C)CC4=O)C)CCc2cc1OC	6
CHEMBL3354878	COc1cc2CN(CCc2cc1OC)C(=O)CCC1CCCc2c1cccc2OC	5.3
CHEMBL3354883	COc1cc2CN(CCc2cc1OC)C(=O)CCCc1cn(c2c1cccc2)c1ccc(cc1)F	5.3
CHEMBL4161557	COc1cc2CN(CCc2cc1OC)C1CCC2(CC1)OC(O)Cc1c2cccc1	6.115
CHEMBL3354879	COc1cc2CN(CCc2cc1OC)CC(=O)NC1CCCc2c1cccc2OC	5.3
CHEMBL3354885	COc1cc2CN(CCc2cc1OC)CC(=O)NCc1cn(c2c1cccc2)c1ccc(cc1)F	5.3
CHEMBL4168354	COc1cc2CN(CCc2cc1OC)CCn1cnc2c(c1=O)cc(c(c2)Cl)[N+](=O)[O-]	6
CHEMBL3401454	COc1cc2CN(CCc2cc1OC)c1cc(ccc1C(=O)N)n1nc(c2c1CC(C)(C)CC2=O)C	6
CHEMBL1682084	COc1cc2N(CCCCN(C(=O)c3cc(Br)cc(c3OC)OC)N)CCCCc2cc1OC	5.59
CHEMBL1682082	COc1cc2N(CCCCNC(=O)c3cc(Br)cc(c3OC)OC)CCc2cc1OC	5.34
CHEMBL2435430	COc1cc2OC(C)(C)C=Cc2cc1C(NC(c1ccccc1)C)C	6.36
CHEMBL2435428	COc1cc2OC(C)(C)C=Cc2cc1C(NCc1ccc(cc1)OC)C	6.78
CHEMBL2435442	COc1cc2OC(C)(C)CCc2cc1C(NCCCCc1ccccc1)C	6.94
CHEMBL3354888	COc1cc2c(cc1OC)CCN(C2=O)CCCCn1c2ccccc2c2c1cccc2	5.3
CHEMBL4164137	COc1ccc(c(c1)C)C(=O)CCCCN1CCc2c(C1)cc(c(c2)OC)OC	6
CHEMBL4159357	COc1ccc(c(c1)C)C(CCCCN1CCc2c(C1)cc(c(c2)OC)OC)O	6
CHEMBL4166174	COc1ccc(c(c1)OC)C(=O)CCN1CCc2c(C1)cc(c(c2)OC)OC	6
CHEMBL3806283	COc1ccc(c(c1)OC)C(=O)N1CC(=O)N(C(=O)C21CCCCC2)C1CCCCC1	6.01
CHEMBL4163828	COc1ccc(c(c1)OC)C(CCCCN1CCc2c(C1)cc(c(c2)OC)OC)O	6
CHEMBL4167283	COc1ccc(c(c1)OC)C(CN1CCc2c(C1)cc(c(c2)OC)OC)O	6
CHEMBL1813592	COc1ccc(c(c1)OC)N1CCN(CC1)CCCCOc1ccc2c(c1)NC(=O)CC2	6.21
CHEMBL1917699	COc1ccc(cc1)/C(=C/CN(C)C)/C	6.09
CHEMBL1917717	COc1ccc(cc1)/C(=C/CN1CCOCC1)/C	6
CHEMBL2047240	COc1ccc(cc1)C(=O)C1CCN(CC1)C1CCN(CC1O)C(=O)c1ccc(s1)C	5.63
CHEMBL1822399	COc1ccc(cc1)C(=O)C1CCN(CC1)C1CCN(CC1O)C(=O)c1ccccc1	5.69
CHEMBL1822400	COc1ccc(cc1)C(=O)C1CCN(CC1)C1CCN(CC1O)C(=O)c1cccnc1	4.57
CHEMBL2047239	COc1ccc(cc1)C(=O)C1CCN(CC1)C1CCN(CC1O)C(=O)c1cccs1	5.87
CHEMBL2047127	COc1ccc(cc1)C(=O)C1CCN(CC1)C1CN(CCC1O)C(=O)c1ccc(cc1)F	4.92
CHEMBL2047235	COc1ccc(cc1)C(=O)C1CCN(CC1)C1CN(CCC1O)C(=O)c1ccc(s1)C	4.4
CHEMBL2047232	COc1ccc(cc1)C(=O)C1CCN(CC1)C1CN(CCC1O)C(=O)c1ccccc1	5.24
CHEMBL2047233	COc1ccc(cc1)C(=O)C1CCN(CC1)C1CN(CCC1O)C(=O)c1cccnc1	5.07
CHEMBL2047234	COc1ccc(cc1)C(=O)C1CCN(CC1)C1CN(CCC1O)C(=O)c1cccs1	4.47
CHEMBL2047236	COc1ccc(cc1)C(=O)C1CCN(CC1)C1CN(CCC1O)C(=O)c1sccc1C	4.82
CHEMBL1822405	COc1ccc(cc1)C(=O)C1CCN(CC1)C1CN(CCC1O)Cc1ccc(cc1)F	6.86
CHEMBL1822407	COc1ccc(cc1)C(=O)C1CCN(CC1)C1CN(CCC1O)Cc1ccccc1	6.68
CHEMBL1822408	COc1ccc(cc1)C(=O)C1CCN(CC1)C1CN(CCC1O)Cc1cccnc1	5.65
CHEMBL1289287	COc1ccc(cc1)C(=O)CCCN1CCc2c(C(C1)O)ccc(c2)OCc1ccccc1	6
CHEMBL4277661	COc1ccc(cc1)C(=O)CCN1CCOCC1	6.52
CHEMBL3805975	COc1ccc(cc1)C(=O)N1CC(=O)N(C(=O)C21CCC(CC2)C(C)(C)C)C1CCCCC1	5.03
CHEMBL2047121	COc1ccc(cc1)C(=O)N1CCC(C(C1)N1CCC(CC1)C(=O)c1ccc(cc1)F)O	6.18
CHEMBL1822395	COc1ccc(cc1)C(=O)N1CCC(C(C1)O)N1CCC(CC1)C(=O)c1ccc(cc1)F	5.65
CHEMBL3933959	COc1ccc(cc1)C(CCN(C)C)C	6.94
CHEMBL1290386	COc1ccc(cc1)C1(CCCN2CCc3c(C(C2)O)ccc(c3)OCc2ccccc2)OCC(CO1)(C)C	6
CHEMBL485929	COc1ccc(cc1)C1CCC(CC1)N1CCN(CC1)c1ccccn1	6.625
CHEMBL3355363	COc1ccc(cc1)CCNCCCCc1cn(c2c1cccc2)c1ccc(cc1)F	6.37
CHEMBL2205825	COc1ccc(cc1)CN1C2C3C4C1(O)C1C2C2C3CC4C12	6.99
CHEMBL1824781	COc1ccc(cc1)CN1C2CC3CC1(O)CC(C2)C3	5.91
CHEMBL479453	COc1ccc(cc1)CN1C2CCCC1CC(C2)OC(=O)Nc1cc(C)ccc1OC	6.49
CHEMBL471014	COc1ccc(cc1)CN1CC2CCC(=O)C1CN2c1ccccc1	5.2
CHEMBL1782986	COc1ccc(cc1)CN1CC2CCCC(C1CN2Cc1ccccc1)N1CCCC1	6.445
CHEMBL2391067	COc1ccc(cc1)CN1CCN(CC1)S(=O)(=O)Cc1ccccc1	6.72
CHEMBL3298899	COc1ccc(cc1)CNC1CCCC2C1NC(=O)C(=O)N2Cc1ccc(cc1)OC	6.43
CHEMBL3262533	COc1ccc(cc1)Cn1nnc(c1)C(=O)NCCN1CCc2c(C1)cc(c(c2)OC)OC	4.07
CHEMBL3262786	COc1ccc(cc1)Cn1nnc(c1)c1ccc(cc1)C(=O)NCCCCN1CCc2c(C1)cc(c(c2)OC)OC	4.9
CHEMBL1813585	COc1ccc(cc1)N1CCN(CC1)CCCCOc1ccc2c(c1)NC(=O)CC2	6.77
CHEMBL5078846	COc1ccc(cc1)OCCN1C(C)(C)CCCC1(C)C	5.3
CHEMBL5083085	COc1ccc(cc1)OCCN1C(C)CCCC1C	6.42
CHEMBL2349442	COc1ccc(cc1)c1sc(c2c1C1(CCN(CC1)Cc1ccccc1)OC2=O)c1ccc(cc1)OC	6.8
CHEMBL3259847	COc1ccc(cc1)n1nnc(c1)C(=O)NCCN1CCc2c(C1)cc(c(c2)OC)OC	4
CHEMBL3262790	COc1ccc(cc1C(=O)NCCCCN1CCc2c(C1)cc(c(c2)OC)OC)n1nnc(c1)CN(C)C	4.65
CHEMBL3262791	COc1ccc(cc1C(=O)NCCCCN1CCc2c(C1)cc(c(c2)OC)OC)n1nnc(c1)c1cncn1C	5.2
CHEMBL3086333	COc1ccc(cc1NC(=O)OC1CC23C(C1)(CCCC2)CC(C3)NCc1ccccc1)C	6.31667
CHEMBL480047	COc1ccc(cc1NC(=O)OC1CC2CCCC(C1)N2CCc1ccc(cc1)N(C)C)C	5.73
CHEMBL516442	COc1ccc(cc1NC(=O)OC1CC2CCCC(C1)N2Cc1ccc(cc1)SC)C	5.69
CHEMBL479260	COc1ccc(cc1NC(=O)OC1CC2CCCC(C1)N2Cc1ccc(nc1)F)C	5.6
CHEMBL480625	COc1ccc(cc1NC(=O)OC1CC2CCCC(C1)N2Cc1ccncc1)C	5.81
CHEMBL3355370	COc1ccc(cc1OC)CNCCCCc1cn(c2c1cccc2)c1ccc(cc1)F	5.57
CHEMBL2409385	COc1ccc(cn1)C(=O)C1CCN(CC1)C1Cc2ccccc2CC1O	6.01
CHEMBL138900	COc1ccc2c(c1)CCC(C2)CN1CCN(CC1)c1ccccn1	6.45
CHEMBL4590193	COc1ccc2c(c1)CCC(CC2O)NCCCc1ccccc1	6.84667
CHEMBL2349071	COc1ccc2c(c1)CCCC2CCCN1C(C)(C)CCCC1(C)C	6.43
CHEMBL2349073	COc1ccc2c(c1)CCCC2CCCN1C(C)CCCC1C	6.96
CHEMBL2437384	COc1ccc2c(c1)CCN(C2=O)CCCN1CCc2c(C1)cc(c(c2)OC)OC	6.4
CHEMBL4457995	COc1ccc2c(c1)CCN(CC2)CC(CCc1ccccc1)F	6.67
CHEMBL4574220	COc1ccc2c(c1)CCN(CC2O)CC(CCc1ccccc1)F	6.23
CHEMBL4463826	COc1ccc2c(c1)CCN(CC2O)CCC#Cc1ccccc1	6.25
CHEMBL4473837	COc1ccc2c(c1)CCN(CC2O)CCC(Cc1ccccc1)F	6.68
CHEMBL4472450	COc1ccc2c(c1)CCN(CC2O)CCCC#Cc1ccccc1	6.79
CHEMBL1289403	COc1ccc2c(c1)CCN(CC2O)CCCCc1ccccc1	6.728
CHEMBL4521578	COc1ccc2c(c1)CCN(CC2O)CCCCc1cccnc1	6.56
CHEMBL4553195	COc1ccc2c(c1)CCN(CC2O)CCCCc1cccs1	6.47
CHEMBL535636	COc1ccc2c(c1)c(CCCN1CCCC(C1)(C)C)ccc2	6.94
CHEMBL2391541	COc1ccc2c(c1)c(CCN(CC=C)CC=C)c[nH]2	6.4
CHEMBL3099035	COc1ccc2c(c1)c(c[nH]2)C(=O)CN1CCC(CC1)(O)c1ccccc1	6.99
CHEMBL456206	COc1ccc2c(c1)c(c[nH]2)C(=O)CN1CCC(CC1)Cc1ccccc1	5.3
CHEMBL3099034	COc1ccc2c(c1)c(c[nH]2)C(=O)CN1CCC(CC1)c1ccccc1	5.72
CHEMBL1170096	COc1ccc2c(c1)c(c[nH]2)CN1CCC(CC1)(O)c1ccc(cc1)Br	6.97
CHEMBL1173778	COc1ccc2c(c1)c(c[nH]2)CN1CCC(CC1)n1c(=O)[nH]c2c1cccc2	5.75
CHEMBL3133866	COc1ccc2c(c1)cc([nH]2)C(=O)NC/C=C/CN1CCN(CC1)c1ccccc1OC	5
CHEMBL3621986	COc1ccc2c(c1)ccc(c2)C1(O)CCN(C1C)C	5.82
CHEMBL2349067	COc1ccc2c(c1)cccc2CCCN1C(C)(C)CCCC1(C)C	6.63
CHEMBL3355375	COc1ccc2c(c1OC)CCC2NCCCCc1cn(c2c1cccc2)c1ccc(cc1)F	6.78
CHEMBL1917718	COc1cccc(c1)/C(=C/CN1CCOCC1)/C	6
CHEMBL4277983	COc1cccc(c1)C(=O)CN1CCC(CC1)Cc1ccccc1	6.88
CHEMBL3951669	COc1cccc(c1)C(CCN(C)C)C	6.62
CHEMBL3954297	COc1cccc(c1)C(CCN1CCOCC1)C	6.86
CHEMBL140287	COc1cccc(c1)C1=CCC(CC1)N1CCN(CC1)c1ccccn1	6.66
CHEMBL487360	COc1cccc(c1)C1CCC(CC1)N1CCN(CC1)c1cccc2c1cccc2	6.62
CHEMBL3355362	COc1cccc(c1)CCNCCCCc1cn(c2c1cccc2)c1ccc(cc1)F	6.82
CHEMBL1824780	COc1cccc(c1)CN1C2CC3CC1(O)CC(C2)C3	5.71
CHEMBL1824787	COc1cccc(c1)CN1C2CC3CC1CC(C2)C3	6.62
CHEMBL3355368	COc1cccc(c1)CNCCCCc1cn(c2c1cccc2)c1ccc(cc1)F	6.26
CHEMBL3262532	COc1cccc(c1)Cn1nnc(c1)C(=O)NCCN1CCc2c(C1)cc(c(c2)OC)OC	4.1
CHEMBL3262785	COc1cccc(c1)Cn1nnc(c1)c1ccc(cc1)C(=O)NCCCCN1CCc2c(C1)cc(c(c2)OC)OC	4.94
CHEMBL4077802	COc1cccc(c1)c1ccc2c(c1)C1CC2CCN1Cc1ccccc1	5.6
CHEMBL3262518	COc1cccc(c1)n1nnc(c1)C(=O)NCCCCN1CCc2c(C1)cc(c(c2)OC)OC	4.69
CHEMBL3262530	COc1cccc(c1)n1nnc(c1)C(=O)NCCN1CCc2c(C1)cc(c(c2)OC)OC	4.12
CHEMBL457722	COc1cccc(c1C1CCC(CC1)N1CCN(CC1)c1ccccn1)OC	5.945
CHEMBL3352842	COc1cccc2c1CCCC2CCC(=O)N1CCC(CC1)C1CCCCC1	5.3
CHEMBL3354877	COc1cccc2c1CCCC2CCC(=O)N1CCC(CC1)c1ccc(cc1)F	5.53
CHEMBL3354875	COc1cccc2c1CCCC2CCC(=O)N1CCC2(CC1)OCc1c2cccc1	6.59
CHEMBL584767	COc1cccc2c1CCCC2CCCCCN1CCC(CC1)C1CCCCC1	6.63
CHEMBL573461	COc1cccc2c1CCCC2CCCN1CCN(CC1)C(=O)C1CCCCC1	5.3
CHEMBL1822596	COc1cccc2c1CCCC2CCCN1CCN(CC1)C1CCN(CC1)CCCCCCNS(=O)(=O)c1cccc2c1cccc2N(C)C	5.3
CHEMBL1822595	COc1cccc2c1CCCC2CCCN1CCN(CC1)C1CCN(CC1)CCCCCCNc1ccc(c2c1non2)[N+](=O)[O-]	5.59
CHEMBL50079	COc1cccc2c1CCCC2CCCN1CCNCC1	6.66
CHEMBL574598	COc1cccc2c1CCCC2CCCN1CC[N+](CC1)(C)C1CCCCC1	6.47
CHEMBL575262	COc1cccc2c1CCCC2CCCNCC(=O)NC1CCCCC1	5.41
CHEMBL573248	COc1cccc2c1CCCC2CCC[N+]1(C)CC[N+](CC1)(C)C1CCCCC1	5.3
CHEMBL1170095	COc1cccc2c1c(c[nH]2)CN1CCC(CC1)(O)c1ccc(cc1)Br	5.59
CHEMBL1173436	COc1cccc2c1c(c[nH]2)CN1CCC(CC1)n1c(=O)[nH]c2c1cccc2	5.38
CHEMBL1813598	COc1ccccc1N1CCN(CC1)CCCCCOc1ccc2c(c1)NC(=O)CC2	5.87
CHEMBL1813599	COc1ccccc1N1CCN(CC1)CCCCCOc1ccc2c(c1)[nH]c(=O)cc2	5.79
CHEMBL3133875	COc1ccccc1N1CCN(CC1)CCCCNC(=O)c1[nH]c2c(c1)cc(cc2)O	5
CHEMBL1688990	COc1ccccc1N1CCN(CC1)CCCCNC(=O)c1ccc(cc1)N(C)C	5.9
CHEMBL1813590	COc1ccccc1N1CCN(CC1)CCCCOc1ccc2c(c1)NC(=O)CC2	5.93
CHEMBL1813597	COc1ccccc1N1CCN(CC1)CCCOc1ccc2c(c1)[nH]c(=O)cc2	5.59
CHEMBL2409386	COc1cccnc1C(=O)C1CCN(CC1)C1Cc2ccccc2CC1O	4.68
CHEMBL3358638	Cc1cc(OC/C=C/CN2CCOCC2)nc(n1)c1ccccc1	6.94
CHEMBL3358636	Cc1cc(OCCCCCN2CCOCC2)nc(n1)c1ccccc1	6.41
CHEMBL3358643	Cc1cc(OCCCN2C(C)(C)CCCC2(C)C)nc(n1)c1ccccc1	6.42
CHEMBL3358651	Cc1cc(OCCCN2CCN(CC2)c2ccccc2)nc(n1)c1ccccc1	5.7
CHEMBL3358646	Cc1cc(OCCCN2CCNCC2)nc(n1)c1ccccc1	6.82
CHEMBL3358633	Cc1cc(OCCN2CCOCC2)nc(n1)c1ccccc1	5.7
CHEMBL3358639	Cc1cc(OCCOCCN2CCOCC2)nc(n1)c1ccccc1	6.37
CHEMBL4636728	Cc1ccc(c(c1)C)CN1CCCN(CC1)C(=O)c1ccccc1	6.07
CHEMBL4638934	Cc1ccc(c(c1)C)CN1CCCN(CC1)C(=O)c1ccco1	6.16
CHEMBL3805259	Cc1ccc(cc1)C(=O)N1CC(=O)N(C(=O)C21CCCC2)C1CCCCC1	6.72
CHEMBL2409378	Cc1ccc(cn1)C(=O)C1CCN(CC1)C1Cc2c(N)cccc2CC1O	4.94
CHEMBL457731	Cc1cccc(c1C1=CCC(CC1)N1CCN(CC1)c1ccccn1)C	6.75
CHEMBL456435	Cc1ccccc1C1CCC(CC1)N1CCN(CC1)c1ccccn1	6.755
CHEMBL3359241	Cc1nc(nc(c1Cl)OCCCN1CCCCC1)c1ccc2c(c1)cccc2	6.99
CHEMBL3359242	Cc1ncnc(c1Cl)OCCCN1CCCCC1	6.73
CHEMBL4216259	Clc1cc(ccc1Cl)CN1CCN(CC1)Cc1c[nH]c2c1cccc2	6.89
CHEMBL3397623	Clc1ccc(c(c1)Cl)CN1CCC(CC1)C(=O)N1CCCc2c1cccc2	6.86
CHEMBL3099052	Clc1ccc(cc1)C1(O)CCN(CC1)CC(=O)c1c[nH]c2c1cc(O)cc2	6.25
CHEMBL4069719	Clc1ccc(cc1)C1(O)CCN(CC1)CC1CC1(C(=O)O)c1ccccc1	6.35
CHEMBL5198792	Clc1ccc(cc1)C1(O)CCN(CC1)CCCCOC(=O)c1ccc(cc1)C(=O)N	6.9
CHEMBL3298900	Clc1ccc(cc1)CNC1CCCC2C1NC(=O)C(=O)N2Cc1ccc(cc1)Cl	6.27
CHEMBL2391074	Clc1ccc(cc1)S(=O)(=O)N1CCC(CC1)Cc1ccccc1	6.26
CHEMBL3805297	Clc1ccc(cc1Cl)n1nc(OCCCN2CCCCC2)c2c(c1=O)CCCC2	6.98
CHEMBL5190189	Clc1ccc2c(c1)C1CC2CCCN1CCc1ccccc1	6.61
CHEMBL2436555	Clc1ccc2c(c1)CNC(=N2)N	5.21
CHEMBL4460262	Clc1ccc2c(c1)n(CCN1CCCCCC1)c(=O)s2	6.74
CHEMBL4591107	Clc1ccc2c(c1)nc(s2)SCCN1CCCCCC1	6.39
CHEMBL2332495	Clc1cccc(c1)CN1C2C3C4C1(O)C1C2C2C3CC4C12	6.73
CHEMBL457720	Clc1ccccc1C1CCC(CC1)N1CCN(CC1)c1ccccn1	6.34
CHEMBL3797704	Cn1c(=O)n(c2c1cc1CC(CCCc1c2)NCCCc1ccccc1)C	5.4
CHEMBL2409382	Cn1ccc(c1)C(=O)C1CCN(CC1)C1Cc2ccccc2CC1O	5.52
CHEMBL4562406	FC(CN1CCc2c(C(C1)O)ccc(c2)OCc1ccccc1)CCc1ccccc1	6.41
CHEMBL4573419	FC(Cc1ccccc1)CCN1CCc2c(C(C1)O)ccc(c2)OCc1ccccc1	6.74
CHEMBL4435229	FC(Cc1ccccc1)CCOc1ccc2c(c1)CCN(CC2)CCC(Cc1ccccc1)F	6.73
CHEMBL2332497	FC(c1cccc(c1)CN1C2C3C4C1(O)C1C2C2C3CC4C12)(F)F	6.57
CHEMBL1163697	FC1(F)CCNC(C1)C1COC(O1)(c1ccccc1)c1ccccc1	6.09
CHEMBL4174291	FCCC1Cc2ccccc2C2(O1)CCC(CC2)N1CCc2c(C1)cc(c(c2)OC)OC	6.045
CHEMBL4159559	FCCC1Cc2ccccc2C2(O1)CCC(CC2)NC1CCc2c(CC1)cccc2	6.44
CHEMBL4162745	FCCC1Cc2ccccc2C2(O1)CCC(CC2)NCc1ccc(cc1C)C	6.01
CHEMBL575127	FCCCC1OC2(c3c1cccc3)CCN(CC2)C(c1ccccc1)c1ccccc1	5.95
CHEMBL480433	FCCN1C2CCCC1CC(C2)OC(=O)Nc1cc(C)ccc1OC	5.7
CHEMBL3597317	FCCOCCOCCOc1ccc(cc1)C(=O)C1CCN(CC1)C1Cc2ccccc2CC1O	5
CHEMBL3133862	FCCOCCOCCOc1ccc2c(c1)cc([nH]2)C(=O)NCCCCN1CCN(CC1)c1ccccc1OC	5
CHEMBL3262792	FCCOCCOCc1nnn(c1)c1ccc(c(c1)C(=O)NCCCCN1CCc2c(C1)cc(c(c2)OC)OC)OC	4.94
CHEMBL3597316	FCCOCCOc1ccc(cc1)C(=O)C1CCN(CC1)C1Cc2ccccc2CC1O	5.8
CHEMBL3133868	FCCOCCOc1ccc2c(c1)cc([nH]2)C(=O)NC/C=C/CN1CCN(CC1)c1ccccc1OC	5
CHEMBL3262535	FCCOCCn1nnc(c1)c1ccc(cc1)C(=O)NCCCCN1CCc2c(C1)cc(c(c2)OC)OC	4.83
CHEMBL226538	FCCOc1c(OC)cc(cc1C(=O)NCCCCN1CCc2c(C1)cc(c(c2)OC)OC)Br	4.82
CHEMBL227071	FCCOc1c(OC)cc(cc1C(=O)NCCCCN1CCc2c(C1)cc(c(c2)OC)OC)I	5.67
CHEMBL4441512	FCCOc1ccc(cc1)C#CCCN1CCc2c(C(C1)O)ccc(c2)OC	6.15
CHEMBL1689004	FCCOc1ccc(cc1)C(=O)NCCCCN1CCN(CC1)c1ccccc1OCCF	5.36
CHEMBL4439555	FCCOc1ccc(cc1)CCCCN1CCc2c(C(C1)O)ccc(c2)O	6.15
CHEMBL3262528	FCCOc1ccc(cc1)Cn1nnc(c1)C(=O)NCCCCN1CCc2c(C1)cc(c(c2)OC)OC	4.67
CHEMBL3262516	FCCOc1ccc(cc1)n1nnc(c1)C(=O)NCCCCN1CCc2c(C1)cc(c(c2)OC)OC	4.33
CHEMBL387741	FCCOc1ccc(cc1C(=O)NCCCCN1CCc2c(C1)cc(c(c2)OC)OC)I	5.89
CHEMBL3262793	FCCOc1ccc(cc1C(=O)NCCCCN1CCc2c(C1)cc(c(c2)OC)OC)n1nnc(c1)CN(C)C	4.66
CHEMBL389261	FCCOc1ccc(cc1C(=O)NCCN1CCc2c(C1)cc(c(c2)OC)OC)C	4.64
CHEMBL2409375	FCCOc1ccc(cn1)C(=O)C1CCN(CC1)C1Cc2ccccc2CC1O	5.67
CHEMBL1173366	FCCOc1ccc2c(c1)c(c[nH]2)CN1CCC(CC1)(O)c1ccc(cc1)Br	6.64
CHEMBL3133779	FCCOc1ccc2c(c1)cc([nH]2)C(=O)NCCCCN1CCN(CC1)c1ccccc1OC	5
CHEMBL3262527	FCCOc1cccc(c1)Cn1nnc(c1)C(=O)NCCCCN1CCc2c(C1)cc(c(c2)OC)OC	4.33
CHEMBL3597321	FCCOc1cccc2c1CC(N1CCC(CC1)C(=O)c1ccc(cc1)F)C(C2)O	5.36333
CHEMBL2437386	FCCOc1cccc2c1CCN(C2=O)CCCN1CCc2c(C1)cc(c(c2)OC)OC	5.51
CHEMBL1173711	FCCOc1cccc2c1c(c[nH]2)CN1CCC(CC1)(O)c1ccc(cc1)Br	5.49
CHEMBL4464273	FCCOc1ccccc1CCCCN1CCc2c(C(C1)O)ccc(c2)OC	6.15
CHEMBL1689012	FCCOc1ccccc1N1CCN(CC1)C/C=C/CNC(=O)c1ccc(cc1)c1cscc1	5.11
CHEMBL1689002	FCCOc1ccccc1N1CCN(CC1)CCCCNC(=O)c1ccc(cc1)N(C)C	5.71
CHEMBL1689006	FCCOc1ccccc1N1CCN(CC1)CCCCNC(=O)c1ccc(cc1)c1cscc1	4.68
CHEMBL1813591	FCCOc1ccccc1N1CCN(CC1)CCCCOc1ccc2c(c1)NC(=O)CC2	4.87
CHEMBL1813595	FCCOc1ccccc1N1CCN(CC1)CCCCOc1ccc2c(c1)[nH]c(=O)cc2	4.68
CHEMBL3262514	FCCOc1ccccc1n1nnc(c1)C(=O)NCCCCN1CCc2c(C1)cc(c(c2)OC)OC	4.77
CHEMBL2409376	FCCOc1cccnc1C(=O)C1CCN(CC1)C1Cc2ccccc2CC1O	4.7
CHEMBL1688991	FCCc1ccc(cc1)C(=O)NCCCCN1CCN(CC1)c1ccccc1OC	5.45
CHEMBL479648	FCCc1ccc(cc1)CN1C2CCCC1CC(C2)OC(=O)Nc1cc(C)ccc1OC	5.77
CHEMBL1171630	FCCn1nnc(c1)CN1CN(C2(C1=O)CCN(CC2)Cc1coc2c1cccc2)c1ccccc1	6.1
CHEMBL3262789	FCCn1nnc(c1)COc1ccc(cc1C(=O)NCCCCN1CCc2c(C1)cc(c(c2)OC)OC)C#N	4.85
CHEMBL3262534	FCCn1nnc(c1)c1ccc(cc1)C(=O)NCCCCN1CCc2c(C1)cc(c(c2)OC)OC	4.14
CHEMBL2332500	Fc1cc(ccc1F)CN1C2C3C4C1(O)C1C2C2C3CC4C12	6.7
CHEMBL1822394	Fc1ccc(cc1)C(=O)C1CCN(CC1)C1CCN(CC1O)C(=O)c1ccc(cc1)F	5.5
CHEMBL1204039	Fc1ccc(cc1)C(=O)C1CCN(CC1)C1Cc2c(N)cccc2CC1O	6
CHEMBL1289955	Fc1ccc(cc1)C(=O)CCCN1CCc2c(C(C1)O)ccc(c2)O	5.98
CHEMBL4777080	Fc1ccc(cc1)C(=O)N1CCC(CC1)NCC[S+](C(c1ccc(cc1)F)c1ccc(cc1)F)[O-]	5.84
CHEMBL3597324	Fc1ccc(cc1)C(=O)c1cccc2c1CC(N1CCC(CC1)c1ccccc1)C(C2)O	6.72
CHEMBL60859	Fc1ccc(cc1)C(CCCN1CCN(CC1)c1ncc(cn1)F)O	6.58
CHEMBL5178450	Fc1ccc(cc1)C(OC(=O)c1ccc(cc1)C(=S)N)CCCN1CCC(CC1)(O)c1ccc(cc1)Cl	6.81
CHEMBL4789139	Fc1ccc(cc1)C(c1ccc(cc1)F)SCCN(C1CCN(CC1)C(=O)c1ccccc1F)C(C)C	6.9
CHEMBL4784884	Fc1ccc(cc1)C(c1ccc(cc1)F)SCCN1CCC(CC1)NCc1ccc(cc1)C(F)(F)F	6.79
CHEMBL4643380	Fc1ccc(cc1)C(c1ccc(cc1)F)SCCN1CCN(CC1)C(=O)CCc1ccccc1	6.53
CHEMBL4742033	Fc1ccc(cc1)C(c1ccc(cc1)F)SCCNC1CCN(CC1)C(=O)c1cc2c([nH]1)cccc2	5.95
CHEMBL4795634	Fc1ccc(cc1)C(c1ccc(cc1)F)SCCNC1CCN(CC1)C(=O)c1cc2c(o1)cccc2	6.52
CHEMBL4781767	Fc1ccc(cc1)C(c1ccc(cc1)F)SCCNC1CCN(CC1)CC1CC1	6.57
CHEMBL4746636	Fc1ccc(cc1)C(c1ccc(cc1)F)SCCNC1CCN(CC1)Cc1cc2c([nH]1)cccc2	6.69
CHEMBL4762414	Fc1ccc(cc1)C(c1ccc(cc1)F)SCCNC1CCN(CC1)Cc1cc2c(o1)cccc2	6.69
CHEMBL4744739	Fc1ccc(cc1)C(c1ccc(cc1)F)SCCNC1CCN(CC1)Cc1ccc(cc1)C(F)(F)F	6.73
CHEMBL3126735	Fc1ccc(cc1)C(c1ccc(cc1)F)SCCNCCCc1ccccc1	6.8
CHEMBL1290496	Fc1ccc(cc1)C1(CCCN2CCc3c(C(C2)O)ccc(c3)OCc2ccccc2)OCC(CO1)(C)C	6
CHEMBL2332501	Fc1ccc(cc1)CN1C2C3C4C1(O)C1C2C2C3CC4C12	6.895
CHEMBL1824779	Fc1ccc(cc1)CN1C2CC3CC1(O)CC(C2)C3	6.19
CHEMBL4438714	Fc1ccc(cc1)CN1CCN(C2C1CCCC2N1CCCC1)C(=O)Cc1ccc(c(c1)Cl)Cl	5.8
CHEMBL4567801	Fc1ccc(cc1)N1CCN(CC1)CCCCn1nc(oc1=O)c1ccccc1	6.42
CHEMBL4293999	Fc1ccc2c(c1)onc2C1CCN(CC1)CCCCC(=O)c1cc2CCC(=O)N3c2c(c1)CC3	6
CHEMBL1824782	Fc1cccc(c1)CCN1C2CC3CC1(O)CC(C2)C3	6.63
CHEMBL5182558	Fc1cccc(c1)CN(C(=O)C1CCCCC1)C1CCN(CC1)CCc1ccccc1	6.26
CHEMBL5181914	Fc1cccc(c1)CN(C(=O)c1cccs1)C1CCN(CC1)CCc1ccccc1	6.86
CHEMBL1824778	Fc1cccc(c1)CN1C2CC3CC1(O)CC(C2)C3	6.06
CHEMBL511507	Fc1cccc(c1C1CCC(CC1)N1CCN(CC1)c1ccccn1)F	6.005
CHEMBL4461774	Fc1ccccc1CCN1CCC2(CC1)CN(c1cccnc1C(F)(F)F)C(=O)C1(O2)CC1	6.76
CHEMBL5181954	Fc1ccccc1CN(C(=O)c1ccco1)C1CCN(CC1)CCc1ccccc1	6.93
CHEMBL2332499	Fc1ccccc1CN1C2C3C4C1(O)C1C2C2C3CC4C12	6.74
CHEMBL1204038	Ic1ccc(s1)C(=O)C1CCN(CC1)C1Cc2ccccc2CC1O	6.71
CHEMBL1189714	Ic1cccc(c1)CNC1C2C3C4C1C1C5(C2C(C3)C41)OCCO5	6.91
CHEMBL3309613	N#CCC1Cc2ccncc2C2(O1)CCN(CC2)Cc1ccccc1	6
CHEMBL2349444	N#Cc1ccc(cc1)c1scc2c1C1(CCN(CC1)Cc1ccccc1)OC2=O	6.72
CHEMBL2436335	N(CCC1CCCc2c1ccs2)CCc1ccccc1	6.9
CHEMBL81602	N=C(Nc1ccc(cc1)C)Nc1ccc(cc1)C	6.75
CHEMBL4744200	NC(=O)C[S+](C(c1ccc(cc1)F)c1ccc(cc1)F)[O-]	4
CHEMBL1201192	NC(=O)C[S+](C(c1ccccc1)c1ccccc1)[O-]	4
CHEMBL335258	NC(=O)c1ccc(cc1)C(=O)O	5
CHEMBL3401446	NC(=O)c1ccc(cc1NC1CC2CCCC(C1)C2NCc1ccccc1)n1nc(c2c1CC(C)(C)CC2=O)C	6
CHEMBL4754599	NC1(CC1(F)c1ccccc1)c1ccccc1	6.34
CHEMBL4741170	NC1CC1(F)c1ccc(cc1)C(F)(F)F	6.805
CHEMBL1190691	NC1CC1(F)c1ccc(cc1)Cl	5.82
CHEMBL4756207	NC1CC1(F)c1ccc(cc1)S(F)(F)(F)(F)F	6.18
CHEMBL1179	NC1CC1c1ccccc1	5.74
CHEMBL1193345	NCC1CC1(F)c1ccccc1	6.37
CHEMBL3633210	NCC1COCC(O1)(C1CCCCC1)c1ccccc1	5
CHEMBL3633207	NCC1COCC(O1)c1ccccc1	5
CHEMBL3633391	NCC1OCC(OC1)(c1ccccc1)c1ccccc1	5.85
CHEMBL3633390	NCC1OCC(OC1)c1ccccc1	5
CHEMBL4795923	NCCC1CCCC(C1)c1ccccc1	6.8075
CHEMBL2170311	NCCC1CCOC(O1)(c1ccccc1)C(C)(C)C	5
CHEMBL1783451	NCCC1CCOC(O1)(c1ccccc1)c1ccccc1	5
CHEMBL2170315	NCCC1CCOC(O1)c1ccccc1	5.445
CHEMBL1783459	NCCC1CCOC2(O1)C1CC3CC2CC(C1)C3	5.9
CHEMBL3633388	NCCC1COCC(O1)(c1ccccc1)c1ccccc1	5
CHEMBL4081063	NCCC1OC2OC(C1)c1c(C2)cccc1	6
CHEMBL3633392	NCCC1OCC(OC1)(c1ccccc1)c1ccccc1	5
CHEMBL1783465	NCCCC1CCOC(O1)(CC)c1ccccc1	5.19
CHEMBL4570472	Nc1ccc2c(c1)CCC(CC2)NCc1ccccc1	6.33
CHEMBL3259961	Nc1ccc2c3c1cccc3c(=O)n(c2=O)CCCCCCOc1cccc2c1CCCC2CCCN1CCN(CC1)C1CCCCC1	6.81
CHEMBL3786461	O1CCN(CC1)CCCOc1nc(nc2c1CCC2)c1ccccc1	6.99
CHEMBL4085658	O1CCN(CC1)c1ccc2c(c1)C1CC2CCN1Cc1ccccc1	5.55
CHEMBL4765081	O=C(C(C)(C)C)N1CCC(CC1)NCCSC(c1ccc(cc1)F)c1ccc(cc1)F	6.79
CHEMBL4756427	O=C(C(C)(C)C)N1CCC(CC1)NCC[S+](C(c1ccc(cc1)F)c1ccc(cc1)F)[O-]	4.95
CHEMBL261482	O=C(C1OC(C(C1O)O)n1cnc2c1ncnc2N)NC1CC1	5.39
CHEMBL4647197	O=C(Cc1ccc(cc1)O[N+](=O)[O-])NC1CCN(CC1)Cc1ccccc1	6.77
CHEMBL5169886	O=C(N(C1CCN(CC1)CCc1ccccc1)Cc1ccccc1)C1CCCC1	6.88
CHEMBL1290606	O=C(N(Cc1ccccc1)C)CN1CCc2c(C(C1)O)ccc(c2)OCc1ccccc1	6
CHEMBL1095520	O=C(N1CC2CCC(C1CN2Cc1ccccc1)N1CCCC1)Cc1ccc(c(c1)Cl)Cl	6.1225
CHEMBL4203850	O=C(N1CC2OCCN(C2C(C1)N1CCCC1)C(=O)Cc1ccc(c(c1)Cl)Cl)Cc1ccc(c(c1)Cl)Cl	6
CHEMBL4068573	O=C(N1CCC2CC1c1cc(ccc21)N1CCN(CC1)C(C)C)OCc1ccccc1	6.33
CHEMBL4060037	O=C(N1CCC2CC1c1cc(ccc21)N1CCN(CC1)C1CCC1)OCc1ccccc1	6.68
CHEMBL4072427	O=C(N1CCC2CC1c1cc(ccc21)N1CCN(CC1)Cc1ccccc1)OCc1ccccc1	6.93
CHEMBL3299002	O=C(N1CCN(C2C1C(CCC2)N1CCCC1)Cc1ccccc1)Cc1ccc(c(c1)Cl)Cl	5.86
CHEMBL2324613	O=C(N1CCN(CC1)C1CCCCC1)CCCCC1SSCC1	6.4
CHEMBL3358650	O=C(N1CCN(CC1)CCCOc1cc(C)nc(n1)c1ccccc1)OC(C)(C)C	5.7
CHEMBL2324618	O=C(N1CCN(CC1)CCCc1ccccc1)CCCCC1CCSS1	5
CHEMBL4218965	O=C(N1CCOC2C1C(CN(C2)C1CCCC1)N1CCCC1)Cc1ccc(c(c1)Cl)Cl	6.74
CHEMBL4206082	O=C(N1CCOC2C1C(CN(C2)Cc1ccccc1)N1CCCC1)Cc1ccc(c(c1)Cl)Cl	6.01
CHEMBL4212604	O=C(N1CCOC2C1C(CNC2)N1CCCC1)Cc1ccc(c(c1)Cl)Cl	6
CHEMBL4173095	O=C(N1CCc2c(C1)cc(cc2)N1CCN(CC1)CC(=C)C)OCc1ccccc1	6.61
CHEMBL1929288	O=C(Nc1nc2c(s1)C(=O)CCC2)CN1CCCC(C1)(C)C	5
CHEMBL5198012	O=C(Nc1nc2c(s1)cccc2C)CCN1CCN(CC1)Cc1cccc2c1cccc2	6
CHEMBL5171428	O=C(Nc1sc2c(n1)c(C)ccc2)CCN1CCN(CC1)C(C)(C)C	6.83
CHEMBL5183248	O=C(Nc1sc2c(n1)c(C)ccc2)CCN1CCN(CC1)C(C)C	5.89
CHEMBL5207817	O=C(Nc1sc2c(n1)c(C)ccc2)CCN1CCN(CC1)CC1CCCO1	6.96
CHEMBL5205006	O=C(Nc1sc2c(n1)c(C)ccc2)CCN1CCN(CC1)CCN(C(C)C)C(C)C	6.09
CHEMBL5193082	O=C(Nc1sc2c(n1)c(C)ccc2)CCN1CCN(CC1)Cc1cc(F)ccc1F	6
CHEMBL5172256	O=C(Nc1sc2c(n1)c(C)ccc2)CCN1CCN(CC1)Cc1ccc(cc1)C(C)(C)C	6.62
CHEMBL5176580	O=C(Nc1sc2c(n1)c(C)ccc2)CCN1CCN(CC1)c1ccc(cc1)C(=O)C	6
CHEMBL5178466	O=C(Nc1sc2c(n1)c(C)ccc2)CCN1CCN(CC1)c1ccccc1C	6
CHEMBL5177298	O=C(Nc1sc2c(n1)c(C)ccc2)CCN1CCN(CC1)c1ccccn1	6
CHEMBL5206534	O=C(Nc1sc2c(n1)c(C)ccc2)CCN1CCN(CC1)c1ccncc1	5.02
CHEMBL5206663	O=C(Nc1sc2c(n1)c(C)ccc2)CCN1CCN(CC1)c1ncccn1	6.3
CHEMBL505059	O=C(OC(c1ccccc1)CCN1CCN(CC1)CCCN(c1ccc(cc1)F)c1ccc(cc1)F)Cc1ccccc1	6.87
CHEMBL2324619	O=C(OC1CCN(CC1)CC1CCCCC1)CCCCC1SSCC1	5.94
CHEMBL2324611	O=C(OC1CCN(CC1)CCCc1ccccc1)CCCCC1CCSS1	4.59
CHEMBL5194121	O=C(c1ccc(cc1)C(=O)N)N1CCN(CC1)Cc1ccccc1	5.3
CHEMBL5190377	O=C(c1ccc(cc1)C(=O)N)NC1CCN(CC1)Cc1ccccc1	6.08
CHEMBL5203238	O=C(c1ccc(cc1)C(=S)N)N1CCN(CC1)Cc1ccccc1	6.18
CHEMBL4294306	O=C(c1ccc(cc1)c1ccccc1)CCCN1CCC(CC1)Cc1ccccc1	6.87
CHEMBL4289312	O=C(c1ccc(cc1)c1ccccc1)CN1CCC(CC1)Cc1ccccc1	6.47
CHEMBL4288252	O=C(c1ccc2c(c1)cccc2)CCN1CCC(CC1)Cc1ccccc1	6.68
CHEMBL2260848	O=C(c1ccc2c(c1)sc(=O)n2CCN1CCCCC1)C1CC1	6
CHEMBL1301346	O=C(c1ccccc1)CCN1CCCCC1	6.77
CHEMBL1588357	O=C(c1ccccc1)CCN1CCOCC1	6.22
CHEMBL1290726	O=C(c1ccccc1)N1CCC(CC1)N1CCc2c(C(C1)O)ccc(c2)OCc1ccccc1	6
CHEMBL4644248	O=C(c1ccccc1)N1CCCN(CC1)Cc1ccccc1	6.94
CHEMBL4636929	O=C(c1ccco1)N1CCCN(CC1)Cc1ccccc1	6.48
CHEMBL4638673	O=C(c1cccs1)N1CCCN(CC1)Cc1ccccc1	6.83
CHEMBL4636240	O=C(c1ccncc1)N1CCCN(CC1)Cc1ccccc1	6.57
CHEMBL3771163	O=C1C(CCC1(c1ccccc1)c1ccccc1)CN1CCC(CC1)Cc1ccccc1	5.95
CHEMBL103	O=C1CCC2(C(=C1)CCC1C2CCC2(C1CCC2C(=O)C)C)C	6.18
CHEMBL1929289	O=C1CCCc2c1sc(n2)NCCN1CCCC(C1)(C)C	5
CHEMBL3358645	O=C1CCN(CC1)CCCOc1cc(C)nc(n1)c1ccccc1	6.5
CHEMBL3805344	O=C1CCN(CC1)CCCOc1ccc(=O)n(n1)c1ccccc1	6.24
CHEMBL3786283	O=C1CCN(CC1)CCCOc1nc(nc2c1CCC2)c1ccccc1	6.72
CHEMBL1813586	O=C1CCc2c(N1)cc(cc2)OCCCCN1CCC(CC1)(O)c1ccc(cc1)Cl	6.38
CHEMBL1813588	O=C1CCc2c(N1)cc(cc2)OCCCCN1CCC(CC1)n1c(=O)[nH]c2c1ccc(c2)Cl	6.8
CHEMBL1813589	O=C1CCc2c(N1)cc(cc2)OCCCCN1CCC2(CC1)N(CN(C2=O)C)c1ccccc1	5.51
CHEMBL4453315	O=C1CCc2c(N1CCCCN1CCN(CC1)c1ccccn1)cccc2	6.92
CHEMBL4463741	O=C1CCc2c(N1CCCCN1CCc3c(C1)cc(cc3)[N+](=O)[O-])cccc2	6.75
CHEMBL4085780	O=C1CCc2c(N1CCCN1CCN(CC1)c1ccccc1)cccc2	6.57
CHEMBL3235445	O=C1CCc2c(N1CCc1ccccc1)ccc(c2)OCCCCN1CCOCC1	6.71
CHEMBL3235450	O=C1CCc2c(N1Cc1ccccc1)cc(cc2)OCCCN1CCN(CC1)c1ccccc1	6.47
CHEMBL3235432	O=C1CCc2c(N1Cc1ccccc1)cc(cc2)OCCN1CCOCC1	5.7
CHEMBL3235440	O=C1CCc2c(N1Cc1ccccc1)ccc(c2)OCCCN1CCOCC1	6.1
CHEMBL3805305	O=C1CN(C(=O)c2ccccc2)C2(C(=O)N1C1CCCCC1)CCC(CC2)C(C)(C)C	5.1
CHEMBL3805661	O=C1CN(C(=O)c2ccccc2)C2(C(=O)N1C1CCCCC1)CCCCC2	6.64
CHEMBL4216136	O=C1COC2C(N1)C(CN(C2)C(=O)Cc1ccc(c(c1)Cl)Cl)N1CCCC1	6
CHEMBL2349457	O=C1Cc2c(scc2C2(O1)CCN(CC2)Cc1ccccc1)c1ccc(cc1)c1ccccc1	6.97
CHEMBL2349452	O=C1Cc2ccsc2C2(O1)CCN(CC2)Cc1ccccc1	6.59
CHEMBL2064191	O=C1Cc2sccc2C2(O1)CCN(CC2)Cc1ccccc1	6.53
CHEMBL2349449	O=C1OC2(c3c1c(sc3)c1ccc(cc1)c1ccccc1)CCN(CC2)Cc1ccccc1	6.11
CHEMBL2349451	O=C1OC2(c3c1c(sc3c1ccc(cc1)c1ccccc1)c1ccc(cc1)c1ccccc1)CCN(CC2)Cc1ccccc1	6
CHEMBL2349450	O=C1OC2(c3c1csc3c1ccc(cc1)c1ccccc1)CCN(CC2)Cc1ccccc1	6.4
CHEMBL2349447	O=C1OC2(c3c1csc3c1cccc3c1cccc3)CCN(CC2)Cc1ccccc1	6.19
CHEMBL2391078	O=S(=O)(N1CCC(CC1)Cc1ccccc1)/C=C/c1ccccc1	6.86
CHEMBL1422857	O=S(=O)(N1CCN(CC1)Cc1ccccc1)/C=C/c1ccccc1	6.7
CHEMBL1172214	O=c1[nH]c2c(n1C1CCN(CC1)Cc1coc3c1cccc3)cccc2	5.75
CHEMBL1169895	O=c1[nH]c2c(n1C1CCN(CC1)Cc1csc3c1cccc3)cccc2	5.73
CHEMBL3804892	O=c1ccc(nn1C1CCCC1)OCCCN1CCCCC1	5.7
CHEMBL3805281	O=c1ccc(nn1c1ccccc1)OCCN1CCCCC1	5.7
CHEMBL4442750	O=c1oc(nn1CCCCN1CCN(CC1)c1ccccn1)c1ccccc1	6.03
CHEMBL4454333	O=c1oc(nn1CCCCN1CCc2c(C1)cc(cc2)[N+](=O)[O-])c1ccccc1	6.08
CHEMBL1469	OC(=O)CCCc1ccccc1	5
CHEMBL4455037	OC(=O)c1cc(C#Cc2ccc(cc2)C(F)(F)F)cc(c1)c1ccc(cc1)C1CCNCC1	5.84
CHEMBL21708	OC(=O)c1ccc(cc1)C	5
CHEMBL3596572	OC(=O)c1ccc(cc1)C(=S)N	5
CHEMBL3352879	OC(CN1CCOCC1)COc1cc(C)nc(n1)c1ccccc1	6.31
CHEMBL4645184	OC(Cc1ccc(cc1)C(F)(F)F)CN1CCN(CC1)CC[S+](C(c1ccc(cc1)F)c1ccc(cc1)F)[O-]	6.83
CHEMBL4750607	OC(Cc1ccccc1)CN1CCC(CC1)NCCSC(c1ccc(cc1)F)c1ccc(cc1)F	6.51
CHEMBL4087925	OC(c1ccccc1)CN1CCCN(C(C1)Cc1ccccc1)Cc1ccccc1	6.96
CHEMBL1824777	OC12CC3CC(C1)CC(N2Cc1ccccc1)C3	5.84
CHEMBL1189234	OC12N(Cc3ccccc3)C3C4C1C1C5C2C3C5C4C1	6.99
CHEMBL4205955	OC1C(C)N(CCc2c1cccc2)Cc1ccccc1	6.58
CHEMBL3769446	OC1C(CCC1(c1ccccc1)c1ccccc1)CN1CCC(CC1)Cc1ccccc1	6.595
CHEMBL4536973	OC1CC(NCCCCc2ccccc2)CCc2c1cccc2	6.85
CHEMBL4513837	OC1CC(NCc2ccccc2)CCc2c1ccs2	6.13
CHEMBL4224939	OC1CC23C(C1)(CCCC2)CN(CC3)Cc1ccccc1	6.69
CHEMBL1204030	OC1CCCCC1N1CCC(CC1)C(=O)c1ccccc1	6.55
CHEMBL3323512	OC1CCN(C1)C1CCCC2C1N(CCN2C)C(=O)Cc1ccc(c(c1)Cl)Cl	6.09
CHEMBL3323508	OC1CCN(C1)C1CCCC2C1N(CCN2Cc1ccccc1)C(=O)Cc1ccc(c(c1)Cl)Cl	6.12
CHEMBL3358644	OC1CCN(CC1)CCCOc1cc(C)nc(n1)c1ccccc1	6.34
CHEMBL2047125	OC1CCN(CC1N1CCC(CC1)C(=O)c1ccc(cc1)F)C(=O)c1ccc(s1)C	5.55
CHEMBL2047123	OC1CCN(CC1N1CCC(CC1)C(=O)c1ccc(cc1)F)C(=O)c1cccnc1	4.86
CHEMBL2047124	OC1CCN(CC1N1CCC(CC1)C(=O)c1ccc(cc1)F)C(=O)c1cccs1	4.65
CHEMBL2047126	OC1CCN(CC1N1CCC(CC1)C(=O)c1ccc(cc1)F)C(=O)c1sccc1C	4.92
CHEMBL1822404	OC1CCN(CC1N1CCC(CC1)C(=O)c1ccc(cc1)F)Cc1cccnc1	5.94
CHEMBL1164041	OC1CCNC(C1)C1COC(O1)(c1ccccc1)c1ccccc1	6.01
CHEMBL1822397	OC1CN(CCC1N1CCC(CC1)C(=O)c1ccc(cc1)F)C(=O)c1cccnc1	5.11
CHEMBL2047237	OC1CN(CCC1N1CCC(CC1)C(=O)c1ccc(cc1)F)C(=O)c1cccs1	5.78
CHEMBL2047238	OC1CN(CCC1N1CCC(CC1)C(=O)c1ccc(cc1)F)C(=O)c1sccc1C	5.24
CHEMBL1289174	OC1CN(CCCC(=O)c2ccc(cc2)C(C)(C)C)CCc2c1ccc(c2)OCc1ccccc1	6
CHEMBL1290270	OC1CN(CCCC2(OCC(CO2)(C)C)c2ccc(cc2)C(C)(C)C)CCc2c1ccc(c2)OCc1ccccc1	6
CHEMBL1290051	OC1CN(CCCCc2ccccc2)CCc2c1ccc(c2)OCc1ccccc1	6.53
CHEMBL3753409	OC1CN(CCCCc2ccccc2)CCc2c1cccc2	6.17
CHEMBL1290160	OC1CN(CCCS(=O)(=O)c2ccccc2)CCc2c1ccc(c2)OCc1ccccc1	6.46
CHEMBL1290159	OC1CN(CCCSc2ccccc2)CCc2c1ccc(c2)OCc1ccccc1	6.42
CHEMBL1290607	OC1CN(CCc2c1ccc(c2)OCc1ccccc1)C1CCC2(CC1)OCCO2	6.74
CHEMBL1290725	OC1CN(CCc2c1ccc(c2)OCc1ccccc1)C1COC(OC1)c1ccccc1	6.73
CHEMBL1289173	OC1CN(CCc2c1ccc(c2)OCc1ccccc1)Cc1ccc(cc1)N1CCCCC1	6.22
CHEMBL1290497	OC1CN(CCc2c1ccc(c2)OCc1ccccc1)Cc1cccc(c1)c1ccccc1	6
CHEMBL1204043	OC1Cc2c(CC1N1CCC(CC1)C(=O)c1ccc(cc1)F)cccc2N	6.3
CHEMBL2409380	OC1Cc2c(CC1N1CCC(CC1)C(=O)c1cccn1C)cccc2N	5.03
CHEMBL2407114	OC1Cc2cccc(c2CC1N1CCC(CC1)C(=O)c1cccnc1)N	4.69
CHEMBL1204041	OC1Cc2cccc(c2CC1N1CCC(CC1)C(=O)c1cccs1)N	6
CHEMBL4172875	OC1Cc2ccccc2C2(O1)CCC(CC2)NCc1ccc(cc1C)C	6.23
CHEMBL1204046	OC1Cc2ccccc2CC1N1CCC(CC1)C(=O)N1CCCCC1	6
CHEMBL1204049	OC1Cc2ccccc2CC1N1CCC(CC1)C(=O)N1CCN(CC1)Cc1ccccc1	6.93
CHEMBL473547	OC1Cc2ccccc2CC1N1CCC(CC1)C(=O)c1ccc(cc1)Br	6.53
CHEMBL2409384	OC1Cc2ccccc2CC1N1CCC(CC1)C(=O)c1ccc(nc1)C	5.67
CHEMBL2409371	OC1Cc2ccccc2CC1N1CCC(CC1)C(=O)c1ccc(nc1)F	6.17
CHEMBL2409370	OC1Cc2ccccc2CC1N1CCC(CC1)C(=O)c1cccc(=O)n1C	5.67
CHEMBL473546	OC1Cc2ccccc2CC1N1CCC(CC1)C(=O)c1ccccc1	6.66
CHEMBL2409381	OC1Cc2ccccc2CC1N1CCC(CC1)C(=O)c1cccn1C	5.89
CHEMBL2409372	OC1Cc2ccccc2CC1N1CCC(CC1)C(=O)c1cccnc1F	5.89
CHEMBL2409369	OC1Cc2ccccc2CC1N1CCC(CC1)C(=O)c1ccn(c(=O)c1)C	5.47
CHEMBL2409368	OC1Cc2ccccc2CC1N1CCC(CC1)C(=O)c1cncc(c1)F	6.15
CHEMBL4550150	OC1Cc2ccccc2CCC1NCCCCc1ccccc1	6.37
CHEMBL3309612	OC1Cc2ccncc2C2(O1)CCN(CC2)Cc1ccccc1	6.75
CHEMBL1829666	OC1Cc2n(C)ncc2C2(O1)CCN(CC2)Cc1ccccc1	6.72
CHEMBL3770593	OCC(OC(c1ccccc1)c1ccccc1)CN1CCC(CC1)Cc1ccccc1	6.7
CHEMBL3233537	OCCC1CN(CCCC)CCN1Cc1ccc(cc1)OC	6.31
CHEMBL3233525	OCCC1CN(CCCC)CCN1Cc1ccccc1	6.55
CHEMBL4168777	OCCC1Cc2ccccc2C2(O1)CCC(CC2)N1CCc2c(C1)cc(c(c2)OC)OC	6
CHEMBL4175566	OCCC1Cc2ccccc2C2(O1)CCC(CC2)NCc1ccc(cc1C)C	6.13
CHEMBL3219068	OCCCC1CN(CCN1CC=C(C)C)Cc1ccc(cc1)OC	6.52
CHEMBL5189158	OCCCN1CCCC2CC1c1cc(ccc21)c1ccc(cc1)C(F)(F)F	5.89
CHEMBL231119	OCCN1CCN(CC1)CCNC(=O)c1ccc(cc1)I	6.85
CHEMBL3401448	OCCNC1C2CCCC1CC(C2)Nc1cc(ccc1C(=O)N)n1nc(c2c1CC(C)(C)CC2=O)C	6
CHEMBL4632707	OCc1ccc(cc1)C(=O)NCCCCN1CCC(CC1)Cc1ccccc1	6.15
CHEMBL4636837	OCc1ccc(cc1)C(=O)O	5
CHEMBL4294991	OCc1ccc2c(c1)CCC(CC2)NCCCc1ccccc1	6.25
CHEMBL480252	OOc1cc2CN(CCCCNC(=O)c3cc(C)ccc3OC)CCc2cc1OO	5.51
CHEMBL4445874	Oc1ccc(cc1)C(C(N1CCC(CC1)Cc1ccccc1)O)C	6.9
CHEMBL4649725	Oc1ccc(cc1)c1cc2c(s1)CCC(CC2)NCCCc1ccccc1	6.74
CHEMBL4284348	Oc1ccc2c(c1)CCC(CC2)NCCCCc1ccccc1	6.68
CHEMBL1289837	Oc1ccc2c(c1)CCN(CC2O)C1CCC(CC1)c1ccccc1	6.805
CHEMBL1289732	Oc1ccc2c(c1)CCN(CC2O)C1CCC2(CC1)OCCO2	6
CHEMBL1289836	Oc1ccc2c(c1)CCN(CC2O)C1CCN(CC1)C(=O)c1ccccc1	6
CHEMBL1289733	Oc1ccc2c(c1)CCN(CC2O)C1COC(OC1)c1ccccc1	6
CHEMBL1289731	Oc1ccc2c(c1)CCN(CC2O)CC(=O)N(Cc1ccccc1)C	6.76
CHEMBL1289626	Oc1ccc2c(c1)CCN(CC2O)CCCCc1ccccc1	6.71
CHEMBL1289627	Oc1ccc2c(c1)CCN(CC2O)CCCOc1ccccc1	6.77
CHEMBL1289628	Oc1ccc2c(c1)CCN(CC2O)CCCS(=O)(=O)c1ccccc1	6
CHEMBL1940599	Oc1ccc2c(c1)[nH]cc2C(=O)C(=O)N1CCC(CC1)Cc1ccccc1	6
CHEMBL558572	Oc1ccc2c(c1)c(CCCN1CCCC(C1)(C)C)ccc2	6.13
CHEMBL3099051	Oc1ccc2c(c1)c(c[nH]2)C(=O)CN1CCC(CC1)(O)c1ccccc1	5.51
CHEMBL518480	Oc1ccc2c(c1)c(c[nH]2)C(=O)CN1CCC(CC1)Cc1ccccc1	5.66
CHEMBL3099050	Oc1ccc2c(c1)c(c[nH]2)C(=O)CN1CCC(CC1)c1ccccc1	5.57
CHEMBL1940484	Oc1ccc2c(c1)c(c[nH]2)C(=O)CN1CCN(CC1)Cc1ccccc1	6.36
CHEMBL537696	Oc1ccc2c(c1)cccc2CCCN1CCCC(C1)(C)C	6.47
CHEMBL2409366	[11CH3]Nc1ccc(cc1)C(=O)C1CCN(CC1)C1Cc2ccccc2CC1O	6
CHEMBL4639000	[O-][N+](=O)OCc1ccc(cc1)C(=O)O	5
CHEMBL4647577	[O-][N+](=O)OCc1cccc(c1)C(=O)NCCCCN1CCC(CC1)Cc1ccccc1	6.83
CHEMBL3259960	[O-][N+](=O)c1ccc(c2c1non2)NCCCCCCCCCCOc1cccc2c1CCCC2CCCN1CCN(CC1)C1CCCCC1	6.59
CHEMBL2332498	[O-][N+](=O)c1cccc(c1)CN1C2C3C4C1(O)C1C2C2C3CC4C12	5.96
CHEMBL4762706	[O-][S+](C(c1ccc(cc1)F)c1ccc(cc1)F)CCN(C1CCN(CC1)C(=O)c1ccccc1F)C	6.29
CHEMBL4757505	[O-][S+](C(c1ccc(cc1)F)c1ccc(cc1)F)CCNC1CCN(CC1)C(=O)c1ccccc1	6.23
CHEMBL458553	c1ccc(cc1)C1CCC(CC1)N1CCN(CC1)c1ccccn1	6.54
CHEMBL3769801	c1ccc(cc1)CC1CCN(CC1)CC1CCC(O1)(c1ccccc1)c1ccccc1	6.76
CHEMBL4280186	c1ccc(cc1)CCCNC1CCc2c(CC1)cccn2	6
CHEMBL3220585	c1ccc(cc1)CCN1CCC2(CC1)CCCc1c2ccs1	6.56
CHEMBL4646841	c1ccc(cc1)CCNC1CCc2c(CC1)ccs2	6.88
CHEMBL4759856	c1ccc(cc1)CCNC1Cc2c(C1)cccc2	6.77
CHEMBL4066462	c1ccc(cc1)CN(Cc1ccccc1)CCC1OC2OC(C1)c1c(C2)cccc1	5.98
CHEMBL4061903	c1ccc(cc1)CN1CCCNCC1Cc1ccccc1	6
CHEMBL3770871	c1ccc(cc1)CN1CCN(CC1)CC1CSC(S1)(c1ccccc1)c1ccccc1	6.52
CHEMBL4469920	c1ccc(cc1)CNC1CCC2(CC1)OCCc1c2cccc1	6.8
CHEMBL4744736	c1ccc(cc1)CNC1CCc2c(C1)cccc2	6.55
CHEMBL3633572	c1ccc(cc1)CNCC1CCOC(O1)(c1ccccc1)c1ccccc1	5.52
CHEMBL3633571	c1ccc(cc1)CNCC1CCOC(O1)c1ccccc1	6.5
CHEMBL3633397	c1ccc(cc1)CNCC1COCC(O1)(C1CCCCC1)c1ccccc1	5.695
CHEMBL3633399	c1ccc(cc1)CNCC1COCC(O1)(c1ccccc1)c1ccccc1	5.31
CHEMBL3633393	c1ccc(cc1)CNCC1COCC(O1)c1ccccc1	6.54
CHEMBL2064194	c1ccc(cc1)CNCC1Cc2sccc2C2(O1)CCN(CC2)Cc1ccccc1	6.71
CHEMBL1783454	c1ccc(cc1)CNCCC1CCOC(O1)(c1ccccc1)c1ccccc1	6.49
CHEMBL3633404	c1ccc(cc1)CNCCC1OCC(OC1)(c1ccccc1)c1ccccc1	6.53
CHEMBL244449	c1ccc(cc1)COC1CCC2N(CC1N(CCc1ccccc1)C2)Cc1ccccc1	6.76
CHEMBL3357789	c1ccc(cc1)N1CCN(CC1)C1CCc2c(CC1)cccc2	6.74
CHEMBL3786749	c1ccc(cc1)N1CCN(CC1)CCCOc1nc(nc2c1CCC2)c1ccccc1	5.7
CHEMBL3359227	c1ccc(cc1)c1cc(OCCCN2CCCC2)nc(n1)c1ccccc1	6.13
CHEMBL3359226	c1ccc(cc1)c1nc(OCCCN2CCCC2)cc(n1)C1CC1	6.56
CHEMBL2391079	Brc1ccc(cc1)/C=C/S(=O)(=O)N1CCC(CC1)Cc1ccccc1	6.07
