# Supplementary material for: SIGMAP: an explainable artificial intelligence tool for SIGMA-1 receptor affinity prediction
Source: RSC Med Chem. 2024 Nov 8;16(2):835–48. doi: 10.1039/d4md00722k (PMC11605305; doi:10.1039/d4md00722k)
Supplement: MD-016-D4MD00722K-s005 [file MD-016-D4MD00722K-s005.xlsx]

## Sheet: default_1
Molecule ChEMBL ID	SMILES	pKi(mean)
CHEMBL517541	FCCc1ccc(cc1)CCN1C2CCCC1CC(C2)OC(=O)Nc1cc(C)ccc1OC	5.58
CHEMBL477036	OCC1CN(CCN1Cc1ccccc1)Cc1ccccc1	7.42
CHEMBL576879	COC1Cc2ccccc2C2(O1)CCCN(C2)CCCc1ccccc1	6.165
CHEMBL1813587	O=C1CCc2c(N1)cc(cc2)OCCCCN1CCC(CC1)n1c(=O)[nH]c2c1cccc2	6.36
CHEMBL1813596	COc1ccccc1N1CCN(CC1)CCCOc1ccc2c(c1)NC(=O)CC2	6.12
CHEMBL1829572	COC1Cc2n(ncc2C2(O1)CCN(CC2)CCCc1ccccc1)c1ccccc1	8.49
CHEMBL1829659	CCCCCCCCN1CCC2(CC1)OC(OC)Cc1c2cnn1c1ccccc1	8.54
CHEMBL537399	COc1ccc2c(c1)CCCC2CCCN1CCCCC1(C)C	6.75
CHEMBL3359215	FC(c1cc(OCCCN2CCCCC2)nc(n1)c1ccccc1)(F)F	7.56
CHEMBL3805989	Fc1ccc(cc1F)n1nc(OCCCN2CCCCC2)ccc1=O	8.1
CHEMBL1645212	CCCCN1CCC2(CC1)OC(c1c2cccc1)CCF	8.41
CHEMBL1672033	COc1cccc2c1CCCC2NCCN1CCN(CC1)C1CCCCC1	7.70667
CHEMBL386002	COC(=O)C1(CC1CN1CCN(CC1)c1ccccn1)c1ccc(cc1)C	6.3
CHEMBL523045	C=CCN1CC2C(CCC1CN2Cc1ccc(cc1)OC)OCc1ccccc1	6.5675
CHEMBL1813594	COc1ccccc1N1CCN(CC1)CCCCOc1ccc2c(c1)[nH]c(=O)cc2	5.58
CHEMBL4284122	c1ccc(cc1)CNC1CCc2c(CC1)cccn2	6.03
CHEMBL4636805	Cc1ccc(c(c1)C)CN1CCCN(CC1)C(=O)c1cccs1	6.47
CHEMBL481418	COc1ccc(cc1NC(=O)OC1CC2CCCC(C1)N2Cc1ccc(cc1)N(C)C)C	5.84
CHEMBL2391075	Clc1ccc(cc1)S(=O)(=O)N1CCN(CC1)Cc1ccccc1	6.01
CHEMBL2437387	COc1cc2CN(CCCN3CCc4c(C3=O)cccc4OC)CCc2cc1OC	5.61
CHEMBL3359234	Cc1ccc(cc1)c1nc(OCCCN2CCCCC2)c(c(n1)C)Cl	8.71
CHEMBL3216524	COc1cc(CCN2CCN(CC2)CCCc2ccccc2)ccc1OC	8.35
CHEMBL141209	COC1Cc2ccccc2C2(O1)CCN(CC2)Cc1ccccc1	8.885
CHEMBL1829669	c1ccc(cc1)CN1CCC2(CC1)OCCc1c2cnn1c1ccccc1	8.77
CHEMBL1829566	COC1Cc2n(ncc2C2(O1)CCN(CC2)Cc1ccccc1)c1ccccc1	8.61333
CHEMBL1829568	COC1Cc2n(ncc2C2(O1)CCN(CC2)Cc1ccc(cc1)F)c1ccccc1	9.03
CHEMBL1939698	FCC1OC2(c3c1cccc3)CCN(CC2)Cc1ccccc1	9.13
CHEMBL4160064	COc1cccc(c1)c1ccc2c(c1)CCN(C2)Cc1ccccc1	8.31
CHEMBL540563	COc1ccc2c(c1)cccc2CCCCN1CCC(CC1)(C)C	8.65
CHEMBL138809	COC1OC2(c3c1cccc3)CCN(CC2)Cc1ccccc1	8.955
CHEMBL4281438	COc1ccc2c(c1)ccc(c2)C(=O)CN1CCC(CC1)Cc1ccccc1	6.54
CHEMBL3220584	c1ccc(cc1)CN1CCC2(CC1)CCCc1c2ccs1	7.98
CHEMBL1682085	COc1cc2N(CCCCNC(=O)c3cc(Br)cc(c3OC)OC)CCCc2cc1OC	5.35
CHEMBL443649	O=C(OC(c1ccccc1)CCN1CCN(CC1)CCCN(c1ccc(cc1)F)c1ccc(cc1)F)CCc1ccccc1	6.63
CHEMBL2170307	CCC1(OCCC(O1)CCN)c1ccccc1	5.255
CHEMBL575994	FCCCC1OC2(c3c1cccc3)CCN(CC2)Cc1ccccc1	8.85
CHEMBL3359228	Cc1nc(nc(c1C)OCCCN1CCCC1)c1ccccc1	7.94
CHEMBL3401452	COc1cc2CCN(Cc2cc1OC)CCCCCNc1cc(ccc1C(=O)N)n1nc(c2c1CC(C)(C)CC2=O)C	6
CHEMBL494782	C=CCN1CC2N(CC1Cc1c2[nH]c2c1cc(cc2)OC)Cc1ccc(cc1OC)OC	5.2
CHEMBL3358640	Cc1cc(OCCCN2CCCCC2)nc(n1)c1ccccc1	7.93
CHEMBL3359224	COc1cc(OCCCN2CCCC2)nc(n1)c1ccccc1	7.71
CHEMBL3359223	CC(c1cc(OCCCN2CCCC2)nc(n1)c1ccccc1)C	6.66
CHEMBL3359211	CCc1cc(OCCCN2CCCCC2)nc(n1)c1ccccc1	7.69
CHEMBL1165436	CCCCCCCCN(C(=O)CCc1ccc(cc1)F)CCCCCCCC	4.27
CHEMBL138083	c1ccc(cc1)CN1CCC2(CC1)OCCc1c2cccc1	9.16
CHEMBL3786259	CCN(CCCOc1nc(nc2c1CCCC2)c1ccccc1)CC	7.18
CHEMBL3352885	c1ccc(cc1)c1nc(OCCCN2CCCC2)c2c(n1)CCCC2	6.95
CHEMBL291439	COc1cc2CN(CCCCNC(=O)c3cc(Br)cc(c3OC)OC)CCc2cc1OC	5.475
CHEMBL4101921	c1ccc(cc1)CCCN1CCCN(C(C1)Cc1ccccc1)Cc1ccccc1	7.37
CHEMBL4174128	CN1CCN(CC1)c1ccc2c(c1)CN(CC2)C(=O)OCc1ccccc1	6.5
CHEMBL4169752	O1CCN(CC1)c1ccc2c(c1)CCN(C2)Cc1ccccc1	8.77
CHEMBL222236	COC(=O)C1(CC1CN1CCC(CC1)Cc1ccccc1)c1ccccc1	8.66
CHEMBL3219069	OCCCC1CN(CCN1CC=C)Cc1ccc(cc1)OC	5.73
CHEMBL3358637	Cc1cc(OCCCCCCN2CCOCC2)nc(n1)c1ccccc1	5.7
CHEMBL3235458	CC1CCN(CC1)CCCOc1ccc2c(c1)N(Cc1ccc(cc1)C)C(=O)CC2	8.83
CHEMBL357179	OCCC1OC2(c3c1cccc3)CCN(CC2)Cc1ccccc1	7.85
CHEMBL4098442	O=C(N1CCC2CC1c1cc(ccc21)N1CCN(CC1)C1CCCCC1)OCc1ccccc1	7.53
CHEMBL3621977	CN(CCC(c1ccc2c(c1)cccc2)(O)C)C	7
CHEMBL3786949	O=C1CCN(CC1)CCCOc1nc(nc2c1CCCC2)c1ccccc1	6.78
CHEMBL3787434	CN(CCCOc1nc(nc2c1CCCC2)c1ccccc1)C	6.86
CHEMBL3785416	CC1CCN(CC1)CCCCCOc1nc(nc2c1CCCC2)c1ccccc1	6.45
CHEMBL3219066	OCCC1CN(CCN1CC=C)Cc1ccc(cc1)OC	5.97
CHEMBL1170094	COc1ccc2c(c1)c(c[nH]2)CN1CCC(CC1)(O)c1ccc(cc1)Cl	6.62
CHEMBL4456267	Clc1ccc2c(c1)nc(o2)SCCCCN1CCCCCC1	8.62
CHEMBL4590308	Clc1ccc2c(c1)n(CCCCN1CCCCCC1)c(=O)o2	8.64
CHEMBL2035281	CCCCCCCCN1CCC2(C1)OC(c1c2cccc1)OC	8.08
CHEMBL3359220	Cc1nc(nc(c1Cl)OCCCN1CCCCC1)c1ccccc1	8.63
CHEMBL4081942	O=C(N1CCC2CC1c1ccc(cc21)N1CCN(CC1)C1CCC1)OCc1ccccc1	8
CHEMBL4094368	O=C(N1CCC2CC1c1ccc(cc21)N1CCN(CC1)C1CCCC1)OCc1ccccc1	8.34
CHEMBL2047122	OC1CCN(CC1N1CCC(CC1)C(=O)c1ccc(cc1)F)C(=O)c1ccccc1	4.42
CHEMBL2047128	COc1ccc(cc1)C(=O)C1CCN(CC1)C1CN(CCC1O)C(=O)c1ccc(cc1)OC	5.28
CHEMBL1917715	C/C(=C\CN1CCOCC1)/c1ccc(cc1)c1ccccc1	7.94
CHEMBL3805216	CC1CCN(CC1)CCCOc1ccc(=O)n(n1)c1ccc(c(c1)F)F	7.82
CHEMBL3805311	CN1CCN(CC1)CCCOc1ccc(=O)n(n1)c1ccccc1	7.5
CHEMBL144662	OCCC1Cc2ccccc2C2(O1)CCN(CC2)Cc1ccccc1	7.66571
CHEMBL3235438	O=C1CCc2c(N1CCc1ccccc1)cc(cc2)OCCCCN1CCOCC1	7.35
CHEMBL3805535	Cc1ccc(cc1)C(=O)N1CC(=O)N(C(=O)C21CCCCC2)C1CCCCC1	6.4
CHEMBL163876	COc1ccc(cc1)CN1CCN(CC1)Cc1ccccc1	9.33
CHEMBL4636336	OC(Cc1ccc(cc1)C(F)(F)F)CN1CCN(CC1)CCSC(c1ccc(cc1)F)c1ccc(cc1)F	6.73
CHEMBL4647914	OC(Cc1ccccc1)CN1CCN(CC1)CCSC(c1ccc(cc1)F)c1ccc(cc1)F	7.87
CHEMBL2069861	COc1ccc(cc1)CN1CCCN(CC1)Cc1cc2c(o1)cccc2	9.27
CHEMBL441909	CCCCN(CCCCNC(=O)c1cc(I)c(cc1OC)NC(=O)C)C	5.8
CHEMBL221370	COC(=O)C1(CC1CN1CCN(CC1)c1ccccn1)c1ccc(cc1)N	5
CHEMBL1774577	COC(=O)C1(CC1CN1CCC(CC1)(O)c1ccccc1)c1ccccc1	8.32
CHEMBL4448528	CN(C1CCc2c(C(C1)O)cccc2)CCCCc1ccccc1	7.48
CHEMBL3360025	COc1cc(CCN2CCN(CC2)CCCc2ccccc2)ccc1OCCCc1ccccc1	7.73
CHEMBL3359240	Cc1nc(nc(c1Cl)OCCCN1CCCCC1)c1ccc(c(c1)Cl)Cl	7.05
CHEMBL3359219	Cc1nc(nc(c1F)OCCCN1CCCCC1)c1ccccc1	8.43
CHEMBL3358649	CN1CCCN(CC1)CCCOc1cc(C)nc(n1)c1ccccc1	7.73
CHEMBL1940482	Oc1ccc2c(c1)[nH]cc2C(=O)CN1CCC(CC1)Cc1ccccc1	6
CHEMBL1479800	Brc1ccc(cc1)CN1CCN(CC1)S(=O)(=O)Cc1ccccc1	7.87
CHEMBL2047120	Fc1ccc(cc1)C(=O)C1CCN(CC1)C1CN(CCC1O)C(=O)c1ccc(cc1)F	5.51
CHEMBL4068690	O=C(N1CCC2CC1c1cc(ccc21)N1CCN(CC1)C1CCCC1)OCc1ccccc1	6.89
CHEMBL2260851	CCCc1ccc2c(c1)sc(=O)n2CCCN1CCCCC1	8.92
CHEMBL3805836	O=c1ccc(nn1c1ccccc1)OCCCN1CCCCC1	7.67
CHEMBL3235441	O=C1CCc2c(N1Cc1ccccc1)ccc(c2)OCCCCN1CCOCC1	7.65
CHEMBL3235446	O=C1CCc2c(N1Cc1ccccc1)cc(cc2)OCCCN1CCCCC1	8.74
CHEMBL3262536	FCCOCCOCCn1nnc(c1)c1ccc(cc1)C(=O)NCCCCN1CCc2c(C1)cc(c(c2)OC)OC	4.8
CHEMBL521031	C=CCN1CC2C(CCC1CN2Cc1ccc(cc1)OC)OC	5.18
CHEMBL553091	COc1ccc2c(c1)cccc2CCCN1CCCCC1	8.11
CHEMBL537842	COc1ccc2c(c1)CCCC2CCCCN1CCCCC1	9
CHEMBL540818	COc1ccc2c(c1)CCCC2CCCCN1CCC(CC1)(C)C	9.52
CHEMBL1822597	[O-][N+](=O)c1ccc(c2c1non2)NCCCCCCOc1cccc2c1CCCC2CCCN1CCN(CC1)C1CCCCC1	7.1
CHEMBL2349441	COc1ccc(cc1)c1scc2c1C(=O)OC12CCN(CC1)Cc1ccccc1	8.05
CHEMBL2064190	N#CCC1Cc2sccc2C2(O1)CCN(CC2)Cc1ccccc1	7.3725
CHEMBL226539	FCCOc1ccc(cc1C(=O)NCCCCN1CCc2c(C1)cc(c(c2)OC)OC)C	6.48
CHEMBL2349070	COc1ccc2c(c1)CCCC2CCCCN1C(C)(C)CCCC1(C)C	7.44
CHEMBL1190213	COc1ccc2c(c1)cccc2CCCN1CCCCC1(C)C	5.97
CHEMBL3912465	CC(c1ccccc1)(CCN1CCC(CC1)Cc1ccccc1)O	7.66
CHEMBL3233528	OCCC1CN(CCN1Cc1ccccc1)CC1CCCCC1	8.55
CHEMBL3233532	OCCC1CN(CCN1Cc1ccc2c(c1)cccc2)CC1CCCCC1	8.33
CHEMBL3352893	c1ccc(cc1)CCCN1CCN(CC1)CCc1ccc2c(c1)OCO2	8.59
CHEMBL2170678	COC1Cc2cc(sc2C2(O1)CCN(CC2)Cc1ccccc1)c1ccc(cc1)C	7.54
CHEMBL2170676	COC1Cc2cc(sc2C2(O1)CCN(CC2)Cc1ccccc1)c1ccccc1	7.8
CHEMBL3235439	O=C1CCc2c(N1Cc1ccccc1)ccc(c2)OCCN1CCOCC1	5.7
CHEMBL226540	FCCOc1ccc(cc1C(=O)NCCCCN1CCc2c(C1)cc(c(c2)OC)OC)Br	5.97
CHEMBL3959852	CCCN1CCC2C3C1CCCC3C(c1c2cc2cccc(c2n1)OC)CC	6.77
CHEMBL1171418	COC1Cc2sc(cc2C2(O1)CCN(CC2)Cc1ccccc1)Cc1ccccc1	8.48333
CHEMBL1170982	OCC1Cc2sccc2C2(O1)CCN(CC2)Cc1ccccc1	8.57333
CHEMBL1171727	OC1OC2(c3c1cccc3)CCN(CC2)Cc1ccccc1	7.98
CHEMBL2349448	O=C1OC2(c3c1c(sc3c1cccc3c1cccc3)c1cccc3c1cccc3)CCN(CC2)Cc1ccccc1	6.11
CHEMBL2349443	N#Cc1ccc(cc1)c1scc2c1C(=O)OC12CCN(CC1)Cc1ccccc1	8.2
CHEMBL2349554	O=C1OC2(c3c1csc3c1ccccc1)CCN(CC2)Cc1ccccc1	6.32
CHEMBL3804973	COc1ccc(cc1)C(=O)N1CC(=O)N(C(=O)C21CCCC2)C1CCCCC1	6.37
CHEMBL1963486	C/C(=C\CN1CCC(CC1)Cc1ccccc1)/c1ccccc1	9.06
CHEMBL2324617	O=C(N1CCN(CC1)CCc1ccccc1)CCCCC1SSCC1	5.08
CHEMBL3597318	Fc1ccc(cc1)C(=O)C1CCN(CC1)C1Cc2c(O)cccc2CC1O	5.06
CHEMBL1782985	COC(=O)N1CC2C(CCCC1CN2C(=O)Cc1ccc(c(c1)Cl)Cl)N1CCCC1	6.17
CHEMBL1917709	C/C(=C\CN1CCC(CC1)Cc1ccccc1)/c1ccc2c(c1)cccc2	7.78
CHEMBL2324621	O=C(OC1CCN(CC1)CCc1ccccc1)CCCCC1SSCC1	4.87
CHEMBL2170305	NCCC1CCOC(O1)(C)c1ccccc1	5
CHEMBL272899	CCCc1ccc2c(c1)sc(=O)n2CCN1CCCCCC1	9.25
CHEMBL495311	COC1Cc2sccc2C2(O1)CCN(CC2)CCCc1ccccc1	8.62
CHEMBL456451	C=CCN1CC2C(CCC1CN2Cc1ccc(cc1OC)OC)OC	5.105
CHEMBL2409383	OC1Cc2ccccc2CC1N1CCC(CC1)C(=O)c1cccnc1	4.89
CHEMBL4062762	O=C(N1CCC2CC1c1ccc(cc21)N1CCN(CC1)CC1CCCC1)OCc1ccccc1	8.25
CHEMBL3951093	CCCN1CCC2C3C1CCCC3C(c1c2cc2cc(Cl)ccc2n1)CC	6.68
CHEMBL3895012	CC(c1ccc2c(c1)cccc2)CCN1CCC(CC1)Cc1ccccc1	8.0875
CHEMBL3935673	CC(c1ccccc1)CCN1CCCCC1	7.34
CHEMBL1609050	CC(c1ccccc1)CCN1CCOCC1	7.07
CHEMBL4280421	COc1ccc(cc1)C(=O)CCN1CCC(CC1)Cc1ccccc1	7.96
CHEMBL4292746	O=C(c1ccccc1)CCCN1CCC(CC1)Cc1ccccc1	8.05
CHEMBL1824783	Fc1ccc(cc1)CCN1C2CC3CC1(O)CC(C2)C3	6.61
CHEMBL2409379	COc1ccc(cn1)C(=O)C1CCN(CC1)C1Cc2c(N)cccc2CC1O	5.25
CHEMBL4096734	[O-][N+](=O)c1ccc(cc1C(F)(F)F)NCCCCCN1CCC(CC1)Cc1ccccc1	7.39
CHEMBL1939704	Cc1ccc(cc1)S(=O)(=O)OCC1OC2(c3c1cccc3)CCN(CC2)Cc1ccccc1	8.54
CHEMBL2409377	OC1Cc2cccc(c2CC1N1CCC(CC1)C(=O)c1cccn1C)N	5.12
CHEMBL4089029	[O-][N+](=O)c1ccc(cc1C(F)(F)F)NCCCN1CCC(CC1)Cc1ccccc1	7.38
CHEMBL1829671	CC(=C)CCN1CCC2(CC1)OCCc1c2cnn1c1ccccc1	9.01
CHEMBL3819437	OC1CC2CN(C1CN2Cc1ccccc1)CC1CCCCC1	8.09
CHEMBL3633400	c1ccc(cc1)CNCCC1COCC(O1)(c1ccccc1)c1ccccc1	6.3
CHEMBL2435441	COc1cc2OC(C)(C)CCc2cc1C(NCCCc1ccccc1)C	7.72
CHEMBL4163428	CN1CCN(CC1)c1ccc2c(c1)CN(C2)C(=O)OCc1ccccc1	6.6
CHEMBL3736502	[O-][N+](=O)c1ccc2c(c1)CCC(CC2)NCCCCc1ccccc1	7.62
CHEMBL128930	CCN(CCNC(=O)c1cc(I)c(cc1OC)NC(=O)C)CC	5.78
CHEMBL493260	CCCCCCCCN1CCC2(CC1)OC(OC)Cc1c2ccs1	8.29
CHEMBL3262515	FCCOc1cccc(c1)n1nnc(c1)C(=O)NCCCCN1CCc2c(C1)cc(c(c2)OC)OC	4.75
CHEMBL3262526	COc1cc2CN(CCCCNC(=O)c3nnn(c3)Cc3ccc(cc3)O)CCc2cc1OC	4.2
CHEMBL3806193	CC1CCN(CC1)CCCOc1ccc(=O)n(n1)c1ccc(c(c1)Cl)Cl	8.3
CHEMBL3806059	O=c1ccc(nn1c1ccccc1)OCCCCN1CCCCC1	6.91
CHEMBL3805341	O=c1ccc(nn1c1ccccc1)OCCCN1CCCC1	7.45
CHEMBL1783448	CNCCC1CCOC(O1)c1ccccc1	6.35
CHEMBL1783460	NCCCC1CCOC(O1)c1ccccc1	6.78
CHEMBL4284165	Oc1ccc2c(c1)c(=O)cc(o2)C(=O)NCCCC1CCN(CC1)Cc1ccccc1	8.46
CHEMBL535363	COc1ccc2c(c1)cccc2CCCCN1CCCCC1C	9.07
CHEMBL3262525	COc1cc2CN(CCCCNC(=O)c3nnn(c3)Cc3cccc(c3)O)CCc2cc1OC	5.09
CHEMBL1929281	CC1(C)CCCN(C1)CCCC1CCCCc2c1cccc2	9.42
CHEMBL1929282	CC1(C)CCCN(C1)CCCCC1CCCCc2c1cccc2	9.85
CHEMBL3735485	[O-][N+](=O)c1ccc2c(c1)CCC(CC2)NCCc1ccccc1	7.7
CHEMBL3218882	OCCC1CN(CCN1Cc1ccccc1)Cc1ccc(cc1)OC	7.7
CHEMBL1290052	OC1CN(CCCOc2ccccc2)CCc2c1ccc(c2)OCc1ccccc1	6.71
CHEMBL1289288	Fc1ccc(cc1)C(=O)CCCN1CCc2c(C(C1)O)ccc(c2)OCc1ccccc1	6.53
CHEMBL3787276	CN1CCN(CC1)CCCOc1nc(nc2c1CCCC2)c1ccccc1	7.56
CHEMBL1169904	COc1cccc2c1c(c[nH]2)CN1CCC(CC1)(O)c1ccc(cc1)Cl	5.3
CHEMBL1822406	COc1ccc(cc1)CN1CCC(C(C1)N1CCC(CC1)C(=O)c1ccc(cc1)OC)O	6.53
CHEMBL4648377	CCN(C1CCc2c(CC1)ccs2)CCCc1ccccc1	7.77
CHEMBL4642875	OCc1cc2c(s1)CCC(CC2)N(CCc1ccccc1)C	7.25
CHEMBL1645214	CCCCCCCCN1CCC2(CC1)OC(c1c2cccc1)CCF	7.82
CHEMBL444690	O=C(OC(c1ccccc1)CCN1CCN(CC1)CCCN(c1ccc(cc1)F)c1ccc(cc1)F)CCCc1ccccc1	6.61
CHEMBL1917700	COc1cccc(c1)/C(=C/CN(C)C)/C	6
CHEMBL4093286	c1ccc(cc1)CN1CCCN(C(C1)Cc1ccccc1)Cc1ccccc1	7.125
CHEMBL2064195	NC(=O)C1Cc2sccc2C2(O1)CCN(CC2)Cc1ccccc1	6.46
CHEMBL4644834	OCc1cc2c(s1)CCC(CC2)NCCCCc1ccccc1	7.08
CHEMBL4640784	C1CCC2(CC1)OCC(O2)CN1CCN(CC1)Cc1ccccc1	9.13
CHEMBL2349445	N#Cc1ccc(cc1)c1sc(c2c1C1(CCN(CC1)Cc1ccccc1)OC2=O)c1ccc(cc1)C#N	6
CHEMBL583580	COc1cccc2c1CCCC2CCCN1CCC(CC1)C1CCCCC1	6.84
CHEMBL3233527	OCCC1CN(CCc2ccccc2)CCN1Cc1ccccc1	7.51
CHEMBL2324616	O=C(N1CCN(CC1)Cc1ccccc1)CCCCC1SSCC1	6.975
CHEMBL3787269	O1CCN(CC1)CCCOc1nc(nc2c1CCCC2)c1ccccc1	6.92
CHEMBL4758774	OC(Cc1ccccc1)CN1CCC(CC1)NCC[S+](C(c1ccc(cc1)F)c1ccc(cc1)F)[O-]	6.45
CHEMBL4744824	Fc1ccc(cc1)C(c1ccc(cc1)F)SCCNC1CCN(CC1)C(=O)c1ccccc1	8.69
CHEMBL3360024	COc1cc(CCN2CCN(CC2)CCCc2ccccc2)ccc1OCCc1ccccc1	7.88
CHEMBL3633387	NCC1COCC(O1)(c1ccccc1)c1ccccc1	5
CHEMBL1782987	O=C(N1CC2CCCC(C1CN2Cc1ccccc1)N1CCCC1)Cc1ccc(c(c1)Cl)Cl	6.71
CHEMBL1822599	CN(c1cccc2c1cccc2S(=O)(=O)NCCCCCCOc1cccc2c1CCCC2CCCN1CCN(CC1)C1CCCCC1)C	8.04
CHEMBL545508	COc1ccc2c(c1)cccc2CCCCN1CCCC(C1)C	9.4
CHEMBL3894565	CN(Cc1ccc(cc1)Cl)CCCCN1c2ccccc2C(=O)C1=O	6.41
CHEMBL4760742	COc1c(OC)cc2c(c1OC)CCN(C2)CCCCCC(=O)c1c(C)c(OC)c(c(c1OC)OC)OC	6
CHEMBL2170666	COC1Cc2c(scc2C2(O1)CCN(CC2)Cc1ccccc1)c1ccc(cc1)c1ccccc1	7.52
CHEMBL2170654	COC1Cc2c(csc2C2(O1)CCN(CC2)Cc1ccccc1)c1ccc(cc1)C	8.57
CHEMBL2170668	c1ccc(cc1)CN1CCC2(CC1)OCCc1c2csc1c1ccccc1	8.35
CHEMBL1172292	COC1Cc2ccccc2C2(O1)CCN(CC2)CCCCc1ccccc1	8
CHEMBL1170683	Brc1ccc(cc1)C1(O)CCN(CC1)Cc1c[nH]c2c1cccc2	7.92
CHEMBL55317	C(NC1Cc2c(C1)cccc2)CCc1ccccc1	7.24
CHEMBL3918282	OC(Cc1ccccc1)CN1CCN(CC1)CC[S+](C(c1ccc(cc1)F)c1ccc(cc1)F)[O-]	6.9725
CHEMBL1173288	COc1ccc2c(c1)c(c[nH]2)CN1CCC(CC1)(O)c1ccc(cc1)I	6.71
CHEMBL3235444	O=C1CCc2c(N1CCc1ccccc1)ccc(c2)OCCCN1CCOCC1	7.4
CHEMBL1688994	FCCOCCOCCOc1ccc(cc1)C(=O)NCCCCN1CCN(CC1)c1ccccc1OC	5.31
CHEMBL4453563	OC1Cc2ccccc2CCC1NCCCc1ccccc1	5.89
CHEMBL570039	COC1Cc2ccccc2C2(O1)CCCN(C2)CCCCc1ccccc1	6.17
CHEMBL569110	CCCCCCCCN1CCCC2(C1)OC(OC)Cc1c2cccc1	5.75
CHEMBL386931	COC(=O)C1(CC1CN1CCN(CC1)c1ccccn1)c1ccc(cc1)OC	5.9
CHEMBL545278	COc1ccc2c(c1)cccc2CCCCN1CCC(CC1)C	10.52
CHEMBL3805101	CC1CCN(CC1)CCCOc1ccc(=O)n(n1)c1ccc(cc1)Cl	8.02
CHEMBL4472927	C1CCC(CC1)CNC1CCC2(CC1)OCCc1c2cccc1	7.78
CHEMBL4562709	CN(C1CCC2(CC1)OCCc1c2cccc1)CC1CCCCC1	8.305
CHEMBL4204621	OC1C(C)N(CCCCc2ccccc2)CCc2c1cccc2	7.34
CHEMBL3358634	Cc1cc(OCCCN2CCOCC2)nc(n1)c1ccccc1	7.44
CHEMBL1822388	OC1CN(CCC1N1CCC(CC1)C(=O)c1ccc(cc1)F)Cc1ccccc1	8.87
CHEMBL144490	COc1ccc(cc1)CCN1CCN(CC1)CCCc1ccccc1	8.89
CHEMBL1204037	Brc1ccc(s1)C(=O)C1CCN(CC1)C1Cc2ccccc2CC1O	6.89
CHEMBL1828651	COc1cc2CN(CCCN3CCc4c(C3=O)cccc4)CCc2cc1OC	6.15
CHEMBL461956	OC1CCC(CC1N1CCC(CC1)c1ccccc1)OCc1ccc(cc1)F	7.51
CHEMBL1829571	COC1Cc2n(ncc2C2(O1)CCN(CC2)CCc1ccccc1)c1ccccc1	8.57
CHEMBL473129	OC1Cc2ccccc2CC1N1CCC(CC1)C(=O)c1ccc(cc1)F	6.5875
CHEMBL569123	CCCCCCN1CCCC2(C1)OC(OC)Cc1c2cccc1	6.67
CHEMBL5092130	CC(N1CCC(CC1)Cc1ccccc1)CN(C(=O)C(C)C)c1ccccc1	6.58
CHEMBL3359217	C1CCN(CC1)CCCOc1cc(nc(n1)c1ccccc1)c1ccccc1	6.02
CHEMBL5082024	CC1CCCC(N1CCCOc1ccc(cc1)Cl)C	8.35
CHEMBL1783464	NCCCC1CCOC(O1)(c1ccccc1)c1ccccc1	6.76
CHEMBL3786998	CC1CCN(CC1)CCCOc1nc(nc2c1CCC2)c1ccccc1	7.49
CHEMBL3785243	c1ccc(cc1)N1CCN(CC1)CCCOc1nc(nc2c1CCCC2)c1ccccc1	5.7
CHEMBL3785238	CC1CCN(CC1)CCCOc1nc(nc2c1CCCC2)c1ccc(cc1)Cl	7.81
CHEMBL3397619	CC(NC(=O)C1CCN(CC1)Cc1ccc(cc1)Cl)C	6.2
CHEMBL1917704	C/C(=C\CN1CCCCC1)/c1ccc2c(c1)cccc2	9.01
CHEMBL3359212	CCCc1cc(OCCCN2CCCCC2)nc(n1)c1ccccc1	7.46
CHEMBL1822391	COc1ccc(cc1)CN1CCC(C(C1)O)N1CCC(CC1)C(=O)c1ccc(cc1)OC	7.59
CHEMBL1822398	COc1ccc(cc1)C(=O)C1CCN(CC1)C1CCN(CC1O)C(=O)c1ccc(cc1)F	5.68
CHEMBL1783449	CN(CCC1CCOC(O1)c1ccccc1)C	5.78
CHEMBL466096	Fc1ccc(cc1)CN1CCC2(CC1)OC(c1c2cccc1)O	8.48
CHEMBL2069864	CCCOc1ccc(cc1)CN1CCCN(CC1)Cc1cc2c(o1)cccc2	9.82
CHEMBL4785770	Fc1ccc(cc1)C(c1ccc(cc1)F)SCCNC1CCN(CC1)Cc1ccc(cc1)Cl	7.34
CHEMBL2170662	COC1Cc2c(scc2C2(O1)CCN(CC2)Cc1ccccc1)c1ccc(cc1)C	8.7
CHEMBL2332503	Ic1cccc(c1)CN1C2C3C4C1(O)C1C2C2C3CC4C12	6.77
CHEMBL3397613	O=C(C1CCN(CC1)Cc1ccc(cc1)Cl)NC1CCCCC1	8.11
CHEMBL3806303	Clc1ccc(cc1Cl)n1nc(OCCCN2CCCCC2)c2c(c1=O)cccc2	6.85
CHEMBL3787177	CC1CCN(CC1)CCCCOc1nc(nc2c1CCCC2)c1ccccc1	6.62
CHEMBL1829577	CCCCN1CCC2(CC1)OC(OC)Cc1c2cnn1c1ccccc1	8.1
CHEMBL1780003	COC1Cc2ccccc2C2(O1)CCC(CC2)N(Cc1ccccc1)Cc1ccccc1	6
CHEMBL1173363	COc1ccc2c(c1)c(c[nH]2)CN1CCC(CC1)(O)c1ccccc1	5.82
CHEMBL1214831	CCOc1ccc(cc1)CN1CCN(CC1)Cc1cc2c(o1)cccc2	9.74
CHEMBL583994	C=CCC1OC2(c3c1cccc3)CCN(CC2)Cc1ccccc1	8.74
CHEMBL2324620	O=C(OC1CCN(CC1)Cc1ccccc1)CCCCC1SSCC1	6.5
CHEMBL1822387	COc1ccc(cc1)CN1CCC(C(C1)O)N1CCC(CC1)C(=O)c1ccc(cc1)F	8.39
CHEMBL1822396	OC1CN(CCC1N1CCC(CC1)C(=O)c1ccc(cc1)F)C(=O)c1ccccc1	5.55
CHEMBL1689009	FCCOc1ccccc1N1CCN(CC1)C/C=C/CNC(=O)c1ccc(cc1)CCF	5.14
CHEMBL480046	COc1ccc(cc1)CCN1C2CCCC1CC(C2)OC(=O)Nc1cc(C)ccc1OC	6.35
CHEMBL555969	CC1(C)CCCN(C1)CCCCn1c2ccccc2c2c1cccc2	6.76
CHEMBL538089	COc1ccc2c(c1)c(CCCN1CCN(CC1)C1CCCCC1)ccc2	9.05
CHEMBL3235435	O=C1CCc2c(N1Cc1ccccc1)cc(cc2)OCCCCCN1CCOCC1	7.05
CHEMBL1173287	COc1cccc2c1c(c[nH]2)CN1CCC(CC1)(O)c1ccc(cc1)I	6.06
CHEMBL479259	COc1ccc(cc1NC(=O)OC1CC2CCCC(C1)N2Cc1cccnc1)C	5.63
CHEMBL575253	COc1cccc2c1CCCC2CCCN1CCN(CC1)CCCC1CCCc2c1cccc2OC	5.3
CHEMBL4745317	c1ccc(cc1)CCNC1CCc2c(C1)cccc2	7.29
CHEMBL608560	Fc1cccc(c1)CN1C2C3C4C1(O)C1C2C2C3CC4C12	6.82
CHEMBL1688992	FCCOc1ccc(cc1)C(=O)NCCCCN1CCN(CC1)c1ccccc1OC	5.32
CHEMBL4636822	[O-][N+](=O)OCc1ccc(cc1)C(=O)NCCCCN1CCC(CC1)Cc1ccccc1	6.6
CHEMBL4169689	CCOC(=O)CCN1CCN(CC1)c1ccc2c(c1)CN(CC2)C(=O)OCc1ccccc1	6.39
CHEMBL4174489	COc1ccc(c(c1)OC)C(CCN1CCc2c(C1)cc(c(c2)OC)OC)O	6
CHEMBL3235436	O=C1CCc2c(N1Cc1ccccc1)cc(cc2)OCCCCCCN1CCOCC1	6.17
CHEMBL4514409	FC(Cc1ccccc1)CCN1CCc2c(C(C1)O)ccc(c2)O	5.85
CHEMBL4536158	FC(CN1CCc2c(CC1)cccc2)CCc1ccccc1	6.97
CHEMBL4580124	Clc1ccc2c(c1)n(CCCN1CCCCCC1)c(=O)s2	8.13
CHEMBL1917701	CN(Cc1ccccc1)C/C=C(/c1ccccc1)\C	7.04
CHEMBL2349069	COc1ccc2c(c1)cccc2CCCN1C(C)CCCC1C	8.13
CHEMBL4165863	O=C(N1CCc2c(C1)cc(cc2)N1CCN(CC1)C1CCCC1)OCc1ccccc1	7.28
CHEMBL2391059	Clc1cccc(c1)CS(=O)(=O)N1CCN(CC1)Cc1ccccc1	7.17
CHEMBL2391062	Cc1cccc(c1)CS(=O)(=O)N1CCN(CC1)Cc1ccccc1	7.44
CHEMBL3827000	COC(=O)CC1OC(CCN2CCCC2)c2c(C1)cccc2	6
CHEMBL222445	COC(=O)C1(CC1CN1CCC(CC1)(O)c1ccccc1)c1ccc(cc1)Cl	8.77
CHEMBL2035275	COC1Cc2ccccc2C2(O1)CCN(C2)CCc1ccccc1	7.6
CHEMBL2035277	CCCCN1CCC2(C1)OC(OC)Cc1c2cccc1	6.98
CHEMBL458155	Oc1ccc2c(c1)c(c[nH]2)C(=O)C(=O)N1CCC(CC1)Cc1ccccc1	6
CHEMBL5179531	Fc1cccc(c1)CN(C(=O)c1ccccc1)C1CCN(CC1)CCc1ccccc1	7.2
CHEMBL4277603	O=C(c1ccc(cc1)c1ccccc1)CCN1CCC(CC1)Cc1ccccc1	6.78
CHEMBL3597322	FCCOc1cccc2c1CC(O)C(C2)N1CCC(CC1)C(=O)c1ccc(cc1)F	5
CHEMBL3931495	CN(Cc1ccccc1)CCCCn1ccc2c1cccc2	6.51
CHEMBL1917286	FCCOc1ccc(cc1)CN1CCN(CC1)Cc1cc2c(o1)cccc2	10.3
CHEMBL2069966	FCCCOc1ccc(cc1)CN1CCN(C1)Cc1cc2c(o1)cccc2	7.68
CHEMBL2069863	FCCOc1ccc(cc1)CN1CCCN(CC1)Cc1cc2c(o1)cccc2	10
CHEMBL1822403	OC1CCN(CC1N1CCC(CC1)C(=O)c1ccc(cc1)F)Cc1ccccc1	6.97
CHEMBL1204031	OC1CCCCC1N1CCC(CC1)C(=O)c1ccc(cc1)F	6.52
CHEMBL1204044	OC1Cc2c(CC1N1CCC(CC1)C(=O)c1cccs1)cccc2N	6
CHEMBL3357785	c1ccc(cc1)CNC1CCc2c(CC1)cccc2	6.97
CHEMBL4287548	COc1ccc2c(c1)c(=O)cc([nH]2)C(=O)NCCC1CCN(CC1)Cc1ccccc1	8.14
CHEMBL4174792	COc1ccc(c(c1)OC)C(=O)CN1CCc2c(C1)cc(c(c2)OC)OC	6
CHEMBL4174189	CCOC(=O)CCN1CCN(CC1)c1ccc2c(c1)CN(C2)C(=O)OCc1ccccc1	6.45
CHEMBL4161503	O1CCN(CC1)c1ccc2c(c1)CN(C2)Cc1ccccc1	8.23
CHEMBL1204042	Brc1ccc(s1)C(=O)C1CCN(CC1)C1Cc2c(N)cccc2CC1O	6
CHEMBL4788794	Fc1ccc(cc1)C(c1ccc(cc1)F)SCCNC1CCN(CC1)Cc1ccccc1	8.42
CHEMBL3806038	COc1ccc(cc1)C(=O)N1CC(=O)N(C(=O)C21CCCCC2)C1CCCCC1	5.86
CHEMBL570269	CCCCCCCCN1CCC2(CC1)OC(OC)Cc1c2cccc1	8.01
CHEMBL1196613	NC1CC1(F)c1ccc(cc1)F	6.37
CHEMBL3401450	COc1cc2CN(CCCNc3cc(ccc3C(=O)N)n3nc(c4c3CC(C)(C)CC4=O)C)CCc2cc1OC	6
CHEMBL3262522	COc1cccc(c1)Cn1nnc(c1)C(=O)NCCCCN1CCc2c(C1)cc(c(c2)OC)OC	4.9
CHEMBL4092498	C=CCN1CCN(CC1)c1ccc2c(c1)C1CC2CCN1C(=O)OCc1ccccc1	6.03
CHEMBL2391065	Ic1cccc(c1)CN1CCN(CC1)S(=O)(=O)Cc1ccccc1	8.74
CHEMBL4085576	C=CCN1CCN(CC1)c1ccc2c(c1)C1CCN(C2C1)C(=O)OCc1ccccc1	7.91
CHEMBL4093323	CCOC(=O)CCN1CCN(CC1)c1ccc2c(c1)C1CCN(C2C1)C(=O)OCc1ccccc1	6.97
CHEMBL3401447	NC1C2CCCC1CC(C2)Nc1cc(ccc1C(=O)N)n1nc(c2c1CC(C)(C)CC2=O)C	6
CHEMBL395027	CCCCNCCCCNC(=O)c1cc(I)c(cc1OC)NC(=O)C	5.6
CHEMBL4065105	COc1ccc(cc1)CN1CCCN(C(C1)C)Cc1ccccc1	9.18
CHEMBL4645707	CN(C1CCc2c(CC1)ccs2)CCCc1ccccc1	8
CHEMBL3235433	O=C1CCc2c(N1Cc1ccccc1)cc(cc2)OCCCN1CCOCC1	7.83
CHEMBL3235434	O=C1CCc2c(N1Cc1ccccc1)cc(cc2)OCCCCN1CCOCC1	7.22
CHEMBL4644682	[O-][N+](=O)OCc1ccc(cc1)C(=O)NCCCN1CCC(CC1)Cc1ccccc1	6.84
CHEMBL3233536	OCCC1CN(CCCC)CCN1Cc1ccc(cc1)c1ccccc1	6.33
CHEMBL4176474	O=C(N1Cc2c(C1)cc(cc2)N1CCN(CC1)C1CCCC1)OCc1ccccc1	7.36
CHEMBL2069862	CCOc1ccc(cc1)CN1CCCN(CC1)Cc1cc2c(o1)cccc2	9.71
CHEMBL3355369	COc1ccc(cc1)CNCCCCc1cn(c2c1cccc2)c1ccc(cc1)F	6.89
CHEMBL4284692	CN(C1CCc2c(CC1)cccn2)CCCCc1ccccc1	6.58
CHEMBL4448336	Clc1ccc2c(c1)nc(o2)SCCCN1CCCCCC1	8.63
CHEMBL4177497	CC(=C)CN1CCN(CC1)c1ccc2c(c1)CN(C2)C(=O)OCc1ccccc1	7.04
CHEMBL5170176	Fc1ccc(cc1)CC1CC2CCC(C1)N2CC(c1ccccc1)O	8.6175
CHEMBL62408	c1ccc(cc1)CCN1CCC2(CC1)CCCc1c2cccc1	8.1
CHEMBL5195784	Fc1ccc(cc1)/C=C/1\CC2CCC(C1)N2CC(c1ccc(cc1)F)O	8.3
CHEMBL3805363	CC1CCN(CC1)CCCOc1ccc(=O)n(n1)c1ccc(cc1Cl)Cl	7.46
CHEMBL3805053	Clc1ccc(cc1n1nc(OCCCN2CCCCC2)ccc1=O)Cl	7.35
CHEMBL1214892	CCCOc1ccc(cc1)CN1CCN(CC1)Cc1cc2c(o1)cccc2	7.99
CHEMBL1214893	FCCCOc1ccc(cc1)CN1CCN(CC1)Cc1cc2c(o1)cccc2	8.79
CHEMBL4247145	c1ccc(cc1)CCN1CC[Si]2(CC1)CCCc1c2cccc1	8.54
CHEMBL2035278	COC1OC2(c3c1cccc3)CCN(C2)CCc1ccccc1	7.66
CHEMBL1645203	Cc1ccc(cc1)S(=O)(=O)OCCC1OC2(c3c1cccc3)CCN(CC2)Cc1ccccc1	8.82
CHEMBL1214830	COc1ccc(cc1)CN1CCN(CC1)Cc1cc2c(o1)cccc2	9.74
CHEMBL4170669	COc1ccc(c(c1)C)C(CCN1CCc2c(C1)cc(c(c2)OC)OC)O	6
CHEMBL4761905	COc1c(OC)cc2c(c1OC)CCN(C2)CCCCCCC(=O)c1c(C)c(OC)c(c(c1OC)OC)OC	6
CHEMBL4765186	COc1cc2CCN(Cc2c(c1OC)OC)CCCCCCC(=O)c1c(C)c(OC)c(c(c1OC)OC)OC	6
CHEMBL4739972	COc1cc2CCN(Cc2cc1OC)CCCCC(=O)c1c(C)c(OC)c(c(c1OC)OC)OC	6.8
CHEMBL4792476	CCC(=O)N(c1ccc(cc1)F)CCN1CCC(CC1)Cc1ccc(cc1)C	7.33
CHEMBL274699	CCCc1ccc2c(c1)sc(=O)n2CCN1CCCCC1	9.22
CHEMBL4782055	Fc1ccc(cc1)C([S+](CCNC1CCN(CC1)C(=O)c1ccc(cc1F)F)[O-])c1ccc(cc1)F	6.77
CHEMBL4790216	CCC(=O)N(c1ccccn1)CCN1CCC(CC1)Cc1ccccc1	6.4
CHEMBL3262519	COc1ccc(cc1)n1nnc(c1)C(=O)NCCCCN1CCc2c(C1)cc(c(c2)OC)OC	4.41
CHEMBL3262787	COc1cccc(c1)Cn1nnc(c1)c1cccc(c1)C(=O)NCCCCN1CCc2c(C1)cc(c(c2)OC)OC	5.76
CHEMBL3357787	C(CCc1ccccc1)CNC1CCc2c(CC1)cccc2	6.67
CHEMBL2435425	COc1cc2OC(C)(C)C=Cc2cc1C(NCCc1ccccc1)C	7.54
CHEMBL148289	N#CCC1Cc2ccccc2C2(O1)CCN(CC2)Cc1ccccc1	7.8
CHEMBL2170652	COC1Cc2c(csc2C2(O1)CCN(CC2)Cc1ccccc1)c1ccccc1	8.27
CHEMBL4078697	CCCCN1CCCN(C(C1)Cc1ccccc1)CCCC	7.71
CHEMBL3262523	COc1ccc(cc1)Cn1nnc(c1)C(=O)NCCCCN1CCc2c(C1)cc(c(c2)OC)OC	5.48
CHEMBL4780832	Cn1nc(nc1c1ccc(cc1)C(C)(C)C)CN1CCN(CC1)Cc1ccccc1	8.26
CHEMBL558980	COc1ccc2c(c1)CCCC2CCCN1CCCCC1	8.92
CHEMBL544343	COc1ccc2c(c1)cccc2CCCCN1CCCC(C1)(C)C	9.44
CHEMBL4632628	CN(C1CCc2c(CC1)ccs2)CCc1ccccc1	7.38
CHEMBL4634358	c1ccc(cc1)CCCNC1CCc2c(CC1)ccs2	6.73
CHEMBL4789321	CCC(=O)N(c1ccc(cc1)OC)CCN1CCC(CC1)Cc1ccc(cc1)F	8.705
CHEMBL4754021	c1ccc(cc1)CCCN1CCCc2c(CC1)cccc2	7.77
CHEMBL3770992	O=C1C(CCC1(c1ccccc1)c1ccccc1)CN1CCN(CC1)Cc1ccccc1	6.19
CHEMBL4643145	Cc1ccc(c(c1)C)CN1CCCN(CC1)C(=O)c1ccncc1	6.6
CHEMBL4782131	CCOC1(CCN(CC1)Cc1ccccc1)c1ncc(s1)c1ccncc1	8.72
CHEMBL4209225	O=C(N1CCOC2C1C(CN(C2)Cc1cccnc1)N1CCCC1)Cc1ccc(c(c1)Cl)Cl	6.54
CHEMBL4747537	COc1cc2CCN(Cc2c(c1OC)OC)CCCCC(=O)c1c(C)c(OC)c(c(c1OC)OC)OC	6
CHEMBL4472505	Clc1ccc2c(c1)n(CCCN1CCCCCC1)c(=O)o2	8.2
CHEMBL5086252	CCC(=O)N(c1ccccc1)CC(N1CCC(CC1)Cc1ccc(cc1)F)C	6.75
CHEMBL4788466	CCC(=O)N(c1ccc(cc1)C)CCN1CCC(CC1)Cc1ccc(cc1)C	7.54
CHEMBL4777042	CCC(=O)N(c1ccc(cc1)OC)CCCCN1CCC(CC1)Cc1ccccc1	7.74
CHEMBL2170674	COC1Cc2sc(cc2C2(O1)CCN(CC2)Cc1ccccc1)c1ccc(cc1)c1ccccc1	6.66
CHEMBL4777040	CCC(=O)N(c1ccc(cc1)OC)CCN1CCC(CC1)CCc1ccccc1	6.43
CHEMBL3958562	CN(Cc1ccc(cc1)Cl)CCCCN1C(=O)CCCc2c1cccc2	7.74
CHEMBL4060828	[O-][N+](=O)c1ccc(cc1C(F)(F)F)NCCN1CCC(CC1)Cc1ccccc1	7.39
CHEMBL3235443	O=C1CCc2c(N1Cc1ccccc1)ccc(c2)OCCCCCCN1CCOCC1	6.07
CHEMBL2435426	COc1cc2OC(C)(C)C=Cc2cc1C(NCCCc1ccccc1)C	7.96
CHEMBL2435439	COc1cc2OC(C)(C)CCc2cc1C(NCc1ccccc1)C	6.92
CHEMBL4084057	COc1cc2CCN(Cc2cc1OC)CCCCNc1ccc(c(c1)C(F)(F)F)[N+](=O)[O-]	7.42
CHEMBL4747068	[O-][S+](C(c1ccc(cc1)F)c1ccc(cc1)F)CCNC1CCN(CC1)C(=O)c1ccccc1F	5.88
CHEMBL4740343	COc1cc2CCN(Cc2c(c1OC)OC)CCCC(=O)c1c(C)c(OC)c(c(c1OC)OC)OC	6
CHEMBL5204934	O=C(Nc1sc2c(n1)c(C)ccc2)CCN1CCN(CC1)CC1CCCCC1	7.46
CHEMBL5194197	CN(CCCN1CCN(CC1)CCC(=O)Nc1sc2c(n1)c(C)ccc2)C	6.24
CHEMBL5094800	CCC(=O)N(c1ccc(cc1)C)CC(N1CCC(CC1)Cc1ccccc1)C	6.66
CHEMBL596	CCC(=O)N(c1ccccc1)C1CCN(CC1)CCc1ccccc1	5.61
CHEMBL5186423	CCC(=O)N(C1CCN(CC1)CCc1ccccc1)Cc1ccccc1	7.55
CHEMBL4286654	Oc1ccc2c(c1)CCC(CC2)NCCCc1ccccc1	6.91
CHEMBL5170944	Fc1ccc(cc1)C(CN1C2CCC1C/C(=C\c1ccccc1)/C2)O	8.12
CHEMBL5189103	C=CCN1CCC2(C(C1Cc1c2cc(cc1)O)C)C	7.01
CHEMBL3360019	I/C=C\COc1ccc(cc1OC)CCN1CCN(CC1)CCCc1ccccc1	7.97
CHEMBL3910100	CC(c1ccc2c(c1)cccc2)CCN1CCCCC1	8.82
CHEMBL5093427	CCC(=O)N(c1ccccc1)CC(N1CCC(CC1)CCc1ccccc1)C	7.38
CHEMBL4649845	[O-][N+](=O)OCc1cccc(c1)C(=O)NCCCN1CCC(CC1)Cc1ccccc1	7.19
CHEMBL4759924	C(CCc1ccccc1)CNC1CCc2c(C1)cccc2	7.34
CHEMBL5192526	O=C(N(C1CCN(CC1)CCc1ccccc1)Cc1ccccc1)C1CCCCC1	8.55
CHEMBL4763056	COc1c(OC)cc2c(c1OC)CCN(C2)CCCC(=O)c1c(C)c(OC)c(c(c1OC)OC)OC	6
CHEMBL4746910	COc1cc2CCN(Cc2cc1OC)CCCCCCC(=O)c1c(C)c(OC)c(c(c1OC)OC)OC	6
CHEMBL3219067	OCCCC1CN(CCN1Cc1ccccc1)Cc1ccc(cc1)OC	6.73
CHEMBL5208252	Fc1cccc(c1)CN(C(=O)C1CC1)C1CCN(CC1)CCc1ccccc1	7.31
CHEMBL5186562	Fc1cccc(c1)CN(C(=O)c1ccc(cc1)F)C1CCN(CC1)CCc1ccccc1	6.51
CHEMBL4564017	Clc1ccc2c(c1)nc(s2)SCCCN1CCCCCC1	8.9
CHEMBL5187144	CCCC(=O)N(C1CCN(CC1)CCc1ccccc1)Cc1ccccc1	7.26
CHEMBL4561134	OC1CC(NCCCc2ccccc2)CCc2c1cccc2	6.8
CHEMBL5173420	O=C(Nc1sc2c(n1)c(C)ccc2)CCN1CCN(CC1)Cc1ccccc1F	5.77
CHEMBL4785048	CCC(=O)N(c1ccc(cc1)F)CCN1CCC(CC1)Cc1ccccc1	8.39
CHEMBL4797005	CCC(=O)N(c1ccc(cc1)OC)CCCN1CCC(CC1)Cc1ccccc1	8.66
CHEMBL5194022	Fc1ccc(cc1)C(OC(=O)c1ccc(cc1)C(=O)N)CCCN1CCC(CC1)(O)c1ccc(cc1)Cl	6.76
CHEMBL5185196	O=C(N1CCC2CC1C(C2)N1CCCC1)Cc1ccc(c(c1)Cl)Cl	7.625
